# Supplementary material for: Use Of Online Structured Oral Examinations For Postgraduate Specialist And Subspecialist Certification Examinations During The COVID-19 Pandemic In South Africa
Source: Research Square preprint supplement (doi:10.21203/rs.3.rs-1351525/v1), 2022-03-07
Supplement: Supplementary file 1 [file be4601c73f6110269daff86c.xlsx]

## Sheet: Form Responses 1
Timestamp	I agree to participate in this survey	Please select the examination you were invited to participate in from the drop down menu below	Please select the location/venue of your examination	The exam adequately tested my clinical reasoning, judgement, insight, and decision-making.	The case scenarios (examination questions) were appropriate to assess an entry-level specialist /– subspecialist.	The total length of the examination was:	The average time for each station/case was	The examination material was clearly presented.	The use of a larger number of case scenarios rather than the historically smaller number of cases gave me a better chance to show my capability.	Having real patients would have improved the quality of the examination.	Did you experience any technical problems with the way the examination material was presented?	If YES: please provide details	In my opinion, this was a fair examination.	I found it acceptable to have examiners conduct the examination using Zoom.	It would have been preferable to have a local examiner present with me to ask the questions.	I could see the examiners clearly on the computer screen.	Examiners and moderators were visible to you on the screen. Would you have preferred to only have the examiners voice only and no visual of the examiners?	I could hear the examiners clearly on the Zoom call.	Images and videos used were of adequate definition/quality for the process to be considered a fair examination.	The personal “cost saving” to me of having the exam locally using Zoom was worth it.	The “time saved” by being able to participate in the exam locally using Zoom was worth it.	Conducting oral examinations using Zoom is a fair examination technique.	The CMSA should continue to run the exams using Zoom as opposed to a face to face process.	Did you experience any technical problems during the Zoom examination?	If YES: please provide details and explain how it was resolved/managed.	How could the CMSA improve examinations conducted using Zoom?	What were the positive experiences for you as a candidate in this examination?	What were the most negative experiences for you as a candidate in this examination?	Would you like to provide any other feedback that may assist the CMSA with regards to conducting Structured Oral Examinations using Zoom?
2020-07-07 11:06:38	Yes	FC Rad Onc(SA) Part II	Cape Town	3	3	Too short	Too short	2	3	3	No		2	3	3	3	Yes	3	3	3	3	3	3	No		none	none	none	no
2020-07-07 14:58:19	Yes	FC Rad Onc(SA) Part II	Johannesburg	5	5	Appropriate	Appropriate	4	4	2	No		5	5	2	5	No	5	5	5	5	5	5	No		the zoom orals were fine; I had a problem with the computer exam before hand- I think that can improve	not needing to travel; one day of exams	I found the computer written osce part tricky - much more so than paper based osce would have been	I think the computer osce written part needs to be able to save onto the device first - we did not think its fair that a candidate could redo that part because of a glitch; it would have been better that there could not be a loss of the written paper or submit error if it was possible to save a local copy on the device that the invigilator then submits/deletes or whatever. I also found that the w…
2020-07-07 15:01:59	Yes	FC Rad Onc(SA) Part II	Polokwane	5	4	Appropriate	Too short	3	3	3	Yes	I found some of the pictures unclear, and the plan evaluation station time allocated to it was too short.	4	5	4	5	No	4	5	5	5	5	5	Yes	My first 2 patient zoom cases the volume was a bit low	Perhaps with bigger screen	I liked the convenience of not having to travel, and although it was very stressful, I imagine it was less so than it would have been if it was done face-to-face.	Nothing related to exam conduct, I just forgot couldnt recall somethings I know.	Nothing else
2020-07-07 15:06:05	Yes	FC Rad Onc(SA) Part II	Port Elizabeth	3	4	Appropriate	Too short	2	3	5	No		4	4	4	4	No	4	3	4	4	4	4	No		N/A	No travel time . Very professional staff and excellent sanitation protocols	Some images not clear	no
2020-07-07 15:33:50	Yes	FC Rad Onc(SA) Part II	Johannesburg	5	5	Appropriate	Appropriate	2	5	1	No		5	5	3	5	No	5	5	5	5	5	5	No		It is very good the way it is.	Less anxiety.	None.	Yes, the OSCE was stressful because there were no hard copies of the palns that we had to compare so time was wasted going back and forth between the plans screen and the google forms screen. The plans OARs were not clear because the colours used were very much shades of pink for the critical organs like heart and spine which wasted a lot of time.
2020-07-07 15:36:03	Yes	FC Rad Onc(SA) Part II	Bloemfontein	3	3	Too short	Appropriate	3	4	3	No		3	3	3	5	No	5	5	4	4	4	3	No		-	Being in fa,iliar enviroment	-	-
2020-07-07 15:44:32	Yes	FC Rad Onc(SA) Part II	Cape Town	3	3	Too short	Too short	3	3	3	No		2	3	5	5	No	5	5	5	5	3	5	No		Zoom the entire exam	None	The OSCE	The OSCE should be incorporated orally
2020-07-07 15:45:48	Yes	FC Rad Onc(SA) Part II	Cape Town	4	4	Appropriate	Appropriate	4	3	4	No		3	4	3	4	No	4	3	3	3	4	2	Yes	disruption in connectivity	it was adequate	nil	OSCE - timing poor for typing an exam	no
2020-07-07 15:47:11	Yes	FC Rad Onc(SA) Part II	Cape Town	4	4	Too long	Much too short	4	3	3	Yes	Didnt completely understand questions in portfolio oral	3	3	3	5	No	4	4	4	4	3	4	No		Much more time needed for written component	Clinic judgement and decision making under pressure	Oral Portfolio - didnt understand sarcoma question. Written was too long with too little time to answer questions	No
2020-07-07 15:51:31	Yes	FC Rad Onc(SA) Part II	Cape Town	5	5	Appropriate	Appropriate	5	5	2	No		5	5	1	5	No	5	5	5	5	5	5	No		Everything flowed well, there is nothing to improve	there was flow in the exam and backup for hiccups	I had to re do the OSCE component because it disappeared from the screen	It was well structured and can be considered for future exams
2020-07-07 16:14:49	Yes	FC Rad Onc(SA) Part II	Johannesburg	4	4	Much too long	Appropriate	2	4	4	No		4	5	3	5	No	5	2	5	5	5	5	No		nil	the OSCE station should be done physical and not google forms. Its easy to miss images and difficult to compare when needed. The colours were not clear for the DVH and I misinterpreted them. Suggest that we answer and papers scanned to examiners.	see above	see above
2020-07-07 16:18:06	Yes	FC Rad Onc(SA) Part II	Durban	4	5	Too short	Much too short	2	3	2	No		3	5	1	5	No	5	5	5	5	4	5	No		some imaging on station like stain 5 was not clear especially is dose line	all over exam was ok expect some written staion	time was very short for written osce station	no
2020-07-07 16:22:34	Yes	FC Rad Onc(SA) Part II	Polokwane	5	5	Too short	Too short	4	4	1	No		5	5	4	5	Yes	5	5	5	5	5	5	No		zoom meetings were without problems	financial implications of not travelling were worth it	n/a	n/a
2020-07-07 19:31:35	Yes	Cert Rheumatology(SA) Phys	Durban	4	4	Appropriate	Appropriate	4	5	2	No		4	4	1	5	No	5	4	5	5	5	4	No		No suggestions	Professional and well organized examination	None	None
2020-07-07 19:34:12	Yes	Cert Pulmonology(SA) Paed	Durban	5	5	Appropriate	Too short	5	5	1	Yes	There was a lot of echos and feedback from the laptop microphone.	5	5	5	5	No	4	5	5	5	5	5	Yes	Interruptions from technical staff as they were trying to sort out voice feedback from microphones	Use projectors and bigger screens instead of laptops	Moderator was friendly, staff at CMSA offices extremely friendly especially before the exam	None	Can’t think of anything.
2020-07-07 19:49:51	Yes	Cert Cardiology(SA) Paed	Durban	5	5	Appropriate	Appropriate	5	5	1	No		5	5	1	5	No	5	5	5	5	5	3	No		I was fine for me...they must jeep up the great work.	I slept at home prior to exam, drove a short distance to the venue and costs saving for not travelling long distances was the best experience for me.	None.	None.
2020-07-07 19:55:07	Yes	FCORL(SA) Final	Johannesburg	5	5	Appropriate	Appropriate	4	4	3	No		4	4	2	5	No	5	4	5	5	5	4	No		Nil	No traveling	Nil	No
2020-07-07 20:00:50	Yes	FCORL(SA) Final	Johannesburg	3	3	Too short	Much too short	3	5	3	Yes	Patient image was not clear, could not run through diagnostic imaging in real time	4	4	3	4	No	4	3	4	4	3	2	No		More clinical case scenarios- better images	The majority of the examiners where clear and provided enough time for weighted response	Length of time for each case was too short	Perhaps mock examination - with candidates prior to actual exam 2 weeks before as a mandatory
2020-07-07 20:04:22	Yes	Cert Gastroenterology(SA) Phys	Cape Town	5	5	Appropriate	Appropriate	5	5	1	Yes	Internet connection	5	5	2	4	No	4	5	5	5	5	4	Yes	Internet connection	High speed internet, using microsoft team meeting	The college employees were very helpful	Using laptop because the volume of the voice was not great	None
2020-07-07 20:12:09	Yes	Cert Gastroenterology(SA) Phys	Cape Town	5	5	Appropriate	Appropriate	5	5	1	Yes	Internet connection	5	5	2	4	No	4	5	5	5	5	4	Yes	Internet connection	High speed internet, using microsoft team meeting	The college employees were very helpful	Using laptop because the volume of the voice was not great	None
2020-07-07 20:29:08	Yes	FC Path(SA) Chem Part II	Johannesburg	3	3	Much too long	Too short	2	3	1	Yes	The was a glitch for 15 minutes before oral whilst I was sitting in the exam room. And secondly after 45minutes the CMSA time keeper kept interjecting my exam	3	5	2	5	Yes	5	5	5	5	4	4	Yes	The PowerPoint presentation couldn’t start and the timer per question wasn’t working intially	Make sure to technical issue	Standardized oral questions	The cases and calculations where too long. Not possible to finish in 2 hours.	None
2020-07-07 20:29:37	Yes	Cert Rheumatology(SA) Phys	Johannesburg	4	4	Appropriate	Appropriate	4	4	5	Yes	Volume of speaker was too soft. Pop ups came up during the exam and I couldnt see the pictures on the screen. No paper was provided. The case scenarios were too long and wordy in some cases.	4	2	5	2	Yes	3	4	5	5	5	2	Yes	Low volume speaker. Pop ups on screen. No paper provided. Too long wordy cases.	I would prefer having another OSCE or theory paper. The zoom session with time limit was very stressful, if I was given 2 hours to answer the questions at my own pace, would of been better. Dont really see the point of a zoom session with examiner if its paper based cases. It mimics the osce.	Excellent standardisation. All candidates had same examiners, same questions, same experience. Removed all bias from exam	Writing an exam during a Pandemic. The additional pressure of knowing you may not be able to do the exam if you had a fever or symptoms of Covid19, which is beyond our control.	I felt the structured oral exam using Zoom was a repetition of the OSCE and theory paper....didnt see the point when we had an intensive theory component of the exam. Is it really necessary to have the structured oral exam via zoom? I guess the CMSA did their best during the pandemic to ensure we had the opportunity to complete our exams, I appreciate this. Thank you
2020-07-07 20:31:39	Yes	FCORL(SA) Final	Bloemfontein	2	2	Too long	Too short	2	1	4	Yes	Images are not clear on scans and audio skips out sometimes.	2	3	5	4	Yes	4	2	3	3	3	4	Yes	The audinwent off the technical support sorted it quickly	Use better quality scans	I was in Bloemfontein	The time per case was very short The scan images I didnt see well Feedback was not always present and questions didnt lead down a clinical pathway but many	No
2020-07-07 20:32:39	Yes	Cert Gastroenterology(SA) Paed	Cape Town	5	5	Appropriate	Appropriate	4	4	3	No		5	4	3	5	No	5	5	5	5	4	3	No		Screen could be bigger	Well organized , well behaved staff members of CMSA	NO	No specific suggestion
2020-07-07 20:38:37	Yes	FC Path(SA) Viro	Johannesburg	4	4	Too short	Too short	3	4	2	Yes	Delays in sound	4	2	3	1	No	2	4	5	5	4	2	No		Face to face oral examination allow for candidates to engage in discussions which are not feasible with zoom.	None	The oral was intended to be structured however no stationery available for candidates to structure answers before putting forth an answer	None
2020-07-07 20:46:35	Yes	Cert Pulmonology(SA) Phys	Johannesburg	3	3	Too long	Too short	2	3	4	Yes	Unable to see images clearly Blurry image	3	3	4	3	Yes	3	2	2	2	3	2	No		Have the slides on a local monitor rather than over zoom	Decreased risk of infection in the current climate	The waiting for stations The way in which questions were rushed to complete in allocated time - not a real life situation	No
2020-07-07 21:47:01	Yes	Cert Pulmonology(SA) Paed	Johannesburg	5	5	Appropriate	Appropriate	5	5	1	No		5	5	5	5	No	5	5	5	5	5	5	No		It was appropriate.	It is less stressful as there is no physical contact with the examiners. Less nerve weecking.	The waiting for an hour in a chair. Would have preferred a couch.	Well done for coming up with a working solution under the covid circumstances. Bravo!!
2020-07-07 21:58:29	Yes	Cert Dev Paed(SA)	Cape Town	5	4	Appropriate	Appropriate	5	5	5	No		5	5	2	4	No	4	4	3	3	4	4	No		Candidate must be given more time to systematically comment on the video	First successful zoom examination .	The Small computer screen was quite challenging at time	Use a large computer screen
2020-07-07 22:08:22	Yes	Cert Pulmonology(SA) Paed	Johannesburg	5	5	Appropriate	Appropriate	5	4	5	No		5	5	3	5	No	5	5	5	5	5	5	No		I think the exam went very well .	The examiners were quite organised and gave me an opportunity to speak without interruption.	None	None
2020-07-08 00:25:46	Yes	Cert Gastroenterology(SA) Paed	Cape Town	4	4	Appropriate	Appropriate	4	3	2	No		4	5	2	5	No	5	4	5	4	4	4	No		Allow a 1-2min break between cases to allow student to breathe and gather themselves.	Less intimidating than walking into an awkward room full of examiners.	Nil	Waiting for all the candidates before and after the exam to complete versus just arriving only for your allocated time slot could be relooked at, but was understandable with this pilot session to prevent hacking attempts etc
2020-07-08 01:20:53	Yes	Cert Rheumatology(SA) Phys	Cape Town	5	5	Appropriate	Appropriate	5	5	3	No		5	5	3	4	No	5	5	5	5	5	5	No		Incresase the cases to 10	Ability to be examined in more cases and the include of imaging	It was the first experience, there wad a little tension before starting	No
2020-07-08 06:33:34	Yes	Cert Pulmonology(SA) Phys	Johannesburg	3	3	Too long	Too short	2	3	4	Yes	Unable to see images clearly Blurry image	3	3	4	3	Yes	3	2	2	2	3	2	No		Have the slides on a local monitor rather than over zoom	Decreased risk of infection in the current climate	The waiting for stations The way in which questions were rushed to complete in allocated time - not a real life situation	No
2020-07-08 06:45:33	Yes	FCORL(SA) Final	Cape Town	5	5	Appropriate	Appropriate	4	5	2	No		5	4	2	4	No	4	4	5	5	4	5	No		Because there are no real patients perhaps show pictures of not only the positive findings that the examiner needs to candidate to comment on, but also important negative clinical findings. For example, if the main pathology is in the external ear, it would be helpful to show a picture of a normal TM. When the candidate now interpretes the scan, it helps to know that the middle ear was normal.	Massive cost and time saving. It was good to have a wider range of cases including peadiatric and emergency cases that we normally would not be examined on. I found the experience of virtual presence of the examiners less intimidating	It was a new experience, which obviously created anxiety. But once the exam was under way, this quickly subsided	I think it was a fair process
2020-07-08 07:47:54	Yes	Cert Paediatric Neurology(SA)	Cape Town	5	5	Appropriate	Appropriate	4	5	3	No		4	5	4	5	No	5	5	5	5	5	5	No		more questions, more videos	well supportive examination	non	its very nice well structured oral exam
2020-07-08 08:53:44	Yes	Cert Cardiology(SA) Paed	Cape Town	5	5	Appropriate	Too short	4	4	2	Yes	presented videos covered some of the ECG, but this was easily resolved	4	5	2	4	No	5	4	5	5	5	4	Yes	one or to delays becuase of examiners video blocking some of the ECG and one of the examiners audio could not be heard in one of the stations, but this was easily resolved. It did however result in going over time which was a little bit disruptive	have a person in the room at the same time to help with Zoom (doesnt have to be a doctor, could be a examination co -ordinator)	went smoothly mostly. Was less intimidating looking at a screen than sitting infront of a panel of examiners	had to leave the room on 2 or 3 occasions to call for help. would be better to have a person in the room a the same time	no
2020-07-08 08:57:10	Yes	Cert ID(SA) Paed	Cape Town	5	5	Appropriate	Appropriate	4	4	3	No		4	5	1	5	No	5	5	5	5	5	5	No		Online videos demonstrating how it works for Registrars	Was able to complete training despite travel restrictions and covid19 tension	Am slow at typing and the keyboard was not very familiar since I use Mac-Pro	Add extra time to online clinical exams where information had to be typed in
2020-07-08 10:02:12	Yes	FCORL(SA) Final	Cape Town	3	4	Appropriate	Much too short	3	2	4	Yes	I am concerned that not all my answers were heard. A specific case was when I gave an answer/diagnosis and then continued. About 3-5 mins later the same diagnosis was then confirmed by the examiner - I’m not sure if it wasn’t heard or perhaps missed	3	4	3	4	No	4	3	3	4	3	4	No		The feedback during the exam was minimal and the time very short. There were multiple cases in which I had asked many questions on history, but then didn’t know what the answers from a prospective patient would have been. I was asked to move on to examination so then stated things to cover on clinical exam. By this stage, already stated by multiple examiners that “in the interest of time we need …	It’s an excellent platform and should be continued. There were stations led by more senior examiners that were very well conducted and I felt handled well.	Insufficient time and clinical feedback on history examination so a lot of time wasted on this aspect. Insufficient time for management/controversies etc	The clinical images and videos were not all clear. One was a spot diagnosis on a syndromic child and could only see half of the child’s face. It may also be beneficial for the examiners to go through the exam questions beforehand in order to see they are all on the same page and adequately put forward to candidates.
2020-07-08 11:51:42	Yes	Cert Dev Paed(SA)	Cape Town	4	5	Appropriate	Too short	5	5	4	No		5	4	4	5	No	5	5	5	5	5	5	Yes	The sound disappeared for like 10 minutes, but this was rectified and extra time given at the end of the station.	Provide more time for internalizing the scenario, before questions are asked.	All the examiners were very courteous, and I felt at ease. Settings were well organized with adequate back-up. Well done!	The videos could not be replayed if one missed to see something. This is not what goes on in real life. One can always go back to the patient to confirm what they may have missed.	The couselling sessions are rather artificial, like a scripted play, and do not capture a clinician's routine face-to-face patient interactions. The feedback took rather too long, leaving the candidates anxious.
2020-07-08 15:54:57	Yes	Cert Gynaecological Oncology(SA)	Durban	4	4	Too long	Appropriate	4	5	1	No		4	4	2	5	No	5	4	4	4	4	4	No		no suggestions at the moment	new experience and cost saving.	none	nothing for now
2020-07-08 16:03:21	Yes	Cert Gynaecological Oncology(SA)	Durban	4	4	Too long	Too long	4	4	3	No		4	5	4	5	No	5	5	5	5	5	5	No		well run	friendly staff	the long wait between cases	it was very good
2020-07-09 07:28:15	Yes	Cert Pulmonology(SA) Phys	Johannesburg	5	5	Too long	Appropriate	5	5	2	No		5	5	1	5	No	5	5	5	5	5	5	No		They should have paper in the rooms for candidates to write on	The exam process was seamless	It took too long and the waiting areas were cold	None
2020-07-09 14:17:30	Yes	FC Derm(SA) Part II	Durban	4	5	Appropriate	Appropriate	4	3	3	No		4	4	3	4	No	3	3	4	4	4	3	No		More pictures and history	I coped - wasnt so difficult to see pics	New setting takes getting used to	No
2020-07-10 09:09:10	Yes	Cert Critical Care(SA) Paed	Johannesburg	4	4	Appropriate	Appropriate	4	4	1	No		4	5	2	5	No	5	5	5	5	5	5	No		It was a fair exam	Exam at local venue, the exam process ran smoothly	None	None
2020-07-10 10:33:56	Yes	Cert Pulmonology(SA) Phys	Durban	2	4	Appropriate	Much too short	1	1	3	Yes	Imaging: poor quality with distortion appearing as pathology. Videos too small, not projected in a slideshow. Videos played as thumbnails and not projected across screen. Screen was obscured screen during the first case of the exam	1	3	5	3	No	2	1	1	1	1	1	Yes	Examiner could not hear me. I was asked to talk into the microphone, but there wasn't a visible microphone present. Lead to unnecessary repetition of questions and answers. I didn't finish the exam as a result. Poor image quality projection: not corrected by examiner Only told after the exam was completed that technician was present to assist with difficulties. Did not help to know this during th…	Print out images to ensure the same projection of image to every candidate. Provide outline of exam prior to exam. Prior email mentioned only 4 cases, which was double in the actual exam. Have printed questions ready at the center should there be difficulty in connection to not waste the candidates examination time Explain the role of the technician prior to examination. Waited 8 hours for a 1 ho…	Minimal travel cost	Inability to hear and completely see some questions being asked, and trying to give an answer without all the information, leads to frustration and disappointment during the exam that you have thoroughly prepared for	Possibility of reducing the cost of the examination as costs involved in arranging examiners is no longer taken into account. Mock examination two days prior to actual examination does not allow enough time to prepare for the actual examination. Moderator should be present at each institution to ensure integrity of examination
2020-07-10 12:02:03	Yes	FC Derm(SA) Part II	Johannesburg	5	5	Appropriate	Appropriate	5	5	1	Yes	camera issues with zoom call	4	5	1	4	No	4	5	5	5	5	5	Yes	camera. mouse. promptly resolved	more sound isolation in rooms	well planned and executed	some sound disturbances during sessions. people on phone calls can be heard	no thanks
2020-07-10 12:05:35	Yes	FC Derm(SA) Part II	Johannesburg	4	4	Appropriate	Too long	2	2	3	Yes	some pictures were cut	3	5	4	5	No	5	4	5	5	4	3	No		balance the cases and time required according to the history	easy to attend	cases not balanced	its a good exercise just needs balancing time according to questions
2020-07-10 12:09:37	Yes	FC Derm(SA) Part II	Johannesburg	5	3	Too short	Too short	3	5	1	Yes	some patient details/history was vague	5	5	1	4	No	5	3	5	5	5	5	Yes	voice / sound problems	candidates should be asked to answer the questions listed on the slide show. DAY 2 was better organised. Thanks to CMSA for organising the exams in this trying times.	Examiners guiding candidates to	Time constraints	Extra time to prepare and to present cases to the Examiner
2020-07-10 12:34:39	Yes	FC Derm(SA) Part II	Johannesburg	4	4	Appropriate	Too short	4	3	4	No		4	4	5	5	Yes	5	4	5	4	4	4	Yes	microphone problem quickly resolved	streamlining the time slots of candidates to avoid timing issues and overlaps	questions are more focussed from the onset	the time to prepare was too short for some cases with longer scenarios. at times a more comprehensive history or information would've assisted in that it would more closely simulate a real scenario of having actually clerked a patient. also deviations from the initial questions result in running out of time to fully answer all that is planned to be said...the time pressure also impacts on candida…	the provision of this exam at this difficult time of a pandemic is much appreciated and overall worked well. thank you for conducting this format in benefiting candidates after the unprecedented delays this year.
2020-07-15 12:40:35	Yes	FCMFOS(SA) Final	Cape Town	4	4	Appropriate	Too short	4	4	3	No		4	5	3	4	No	4	4	5	5	5	5	No		Was fair	Not adding to the cost by limited travel and accommodation	Long waiting time between written and oral. Uncertainty about when orals would happen.	I feel it is definitely something to consider for future examinations .
2020-07-15 13:15:32	Yes	FCMFOS(SA) Final	Cape Town	5	5	Too short	Too short	5	5	5	Yes	image assessment	5	5	3	5	Yes	5	5	5	5	3	1	Yes	images	n/a	interactive	time and no of stations	no rest stations rather have test station instead
2020-07-15 13:19:45	Yes	FCMFOS(SA) Final	Cape Town	4	5	Too short	Too short	5	5	1	No		5	5	1	5	No	5	5	5	5	5	5	No		I cant think of any	saves time and cost with efficiency	time (in some stations)	No
2020-07-15 13:22:29	Yes	FCMFOS(SA) Final	Cape Town	4	4	Appropriate	Appropriate	3	3	3	No		3	3	4	4	No	3	3	4	3	3	3	Yes	struggling to hear and lose of connection	high resolution connection	none	examiner struggling to understand what i was saying(	no
2020-07-22 12:51:05	Yes	FC Path(SA) Haem Part II	Cape Town	5	4	Appropriate	Appropriate	5	3	2	No		4	5	2	5	No	5	5	4	4	4	5	No		I think it went very well. In light of the possibility that examiners want to discuss a candidate's assessment or any delay (which often happens with Zoom and completely out of CMSA's control) I think it would be wise to give candidates approximate examination times on the schedule, to allow some flexibility and make them aware from the beginning that, here and there, a case might take a bit long…	Excellent support staff at the CMSA examination centre. Seamless logistics, starting and finishing on time, no IT issues at all with electronic answering of papers or Zoom sessions.	Perhaps minor and something I should have solved myself, but I found time management difficult for the written papers answered on the PC. You have a long list of questions on the screen and it's difficult to plan where you should be when half your time is left, for example. Time is often a big issue with our exams - a simple solution would be to provide a single sheet of paper that summarises the…	no. well done!
2020-07-23 10:16:50	Yes	Cert Medical Oncology(SA) Paed	Cape Town	3	4	Too short	Too short	4	4	1	No		4	4	4	4	No	5	4	5	4	3	2	No	none	none	none	There was rush of time..no enough time to think.	none
2020-07-23 11:37:43	Yes	Cert Medical Oncology(SA) Paed	Cape Town	4	4	Appropriate	Appropriate	4	4	2	No		4	4	3	4	No	4	4	5	5	5	4	No		ensure that invigilator is in the same room as candidate.	did not need to travel and incur further expenses for the exam	no invigilator in the room while performing exam	no
2020-07-24 11:25:31	Yes	Cert Neonatology(SA)	Johannesburg	5	5	Appropriate	Appropriate	4	5	1	No		5	5	1	1	No	5	5	5	5	5	2	No		i could not see examiners	it was well structured	not seeing examiners	please make sure we can see examiners
2020-07-27 10:32:09	Yes	Cert Neonatology(SA)	Cape Town	5	5	Appropriate	Appropriate	3	4	1	No		5	5	1	5	No	5	5	5	5	3	3	No		Prepare candidates adequately	Adequate preparation and well organized	Lack of clarity from one of the examiners as regards what the examiner was asking	None
2020-07-27 10:35:31	Yes	Cert Neonatology(SA)	Cape Town	5	5	Appropriate	Appropriate	4	3	1	No		5	5	1	3	Yes	5	5	5	5	3	3	No		Training Candindates on structure of exam	Well structured	One question was unclear	None
2020-07-29 10:57:29	Yes	FCA(SA) Part II	Cape Town	4	4	Too short	Appropriate	3	4	3	No		4	3	2	4	No	4	4	4	4	3	3	Yes	some delays with logging in	maybe more time for some stations that have more slides	none	none	no
2020-07-29 10:59:00	Yes	FCA(SA) Part II	Cape Town	5	5	Appropriate	Too short	5	5	5	No		3	2	5	2	No	2	2	2	2	2	1	Yes	The Echo image frame rate was slow and interrupted, making it difficult to make an accurate and realistic assessment. As a result I may have missed pathology/ problems.	Provide a paper copy of the case scenario and questions. Increase the time allowed for answering.	.	Poor image quality. Therefore easy to misinterpret and miss findings.	Let us see the slide overview on the side of the screen so that we can see how quickly we need to move through all questions in order to get through everything. Some of the examiners are not good at guiding the time management aspect.
2020-07-29 10:59:32	Yes	FCA(SA) Part II	Cape Town	3	3	Appropriate	Too short	1	4	5	Yes	I was unable to visualise the x-ray and video adequately in the slides. They were very poor quality. Of the examiners were not able to share the correct slide which meant we ended up going through the exam haphazardly and because of the lack of sequence I wasn't able to follow exactly what the examiner wanted from me. I also found that because the examiners were writing they didn't necessarily he…	2	1	5	4	No	4	1	4	4	1	1	Yes	The invigilator helped the one examiner to log on to zoom. However, the examiner just told me to read the scenario and ignore the video in one exam and the other exam she just continued to jump through the slides, going back and forth whilst I was trying to answer.	The examiners need adequate training in the use of the zoom platform and they should have practiced this the day before to ensure that all of the slides are working correctly and how to change from one to the other or alternatively have the slides printed before hand as a back up.	Not having to travel across country.	It is very disturbing when the examiners are struggling to login or use zoom. The candidates are anxious enough as is.	NO
2020-07-29 11:09:19	Yes	FCA(SA) Part II	Durban	4	4	Appropriate	Much too short	2	4	2	Yes	Big side screens are good to project full case information in terms of text (but then this means that there is too much text to read as well before beginning to answer your station with your time ticking away). If an image is projected onto the entire big screen, it ends up being blurry (videos, detail in ultrasound ends up lost, etc.) - unable to zoom out to get better resolution of the images	3	4	4	4	No	4	1	3	3	3	2	Yes	As stated, regarding image and video quality - poor when enlarged to a big screen. Also with only 10mins for the OSCE station, an examiner reading the question to you too slowly eats into your time to answer (we're able to read the question much faster and want to start answering as the text is available on-screen). Need at least 3 mins of preparation for each OSCE station to organize out thought…	Ability to zoom in and out of screen images and videos or have additional smaller screen available to see unblurred details in images. The big screens are good for lots of information/text to project onto one screen without having to scroll back and forth, but if the whole screen is full of text, that's alot of text to go through and eats into exam time!	Home location	Unfamiliar examination style, technical errors highlighted above - unsettling for the rest of the stations if you start of with a bad experience on your first station	As above. We understand it's a huge undertaking by CMSA to organize this, and we're grateful (we know the logistics would've been a nightmare!), but the issues above highlight our experience. Thank you.
2020-07-29 11:19:50	Yes	FCA(SA) Part II	Durban	3	3	Appropriate	Much too short	2	2	5	Yes	Unable to display images when required, some lag in transmission	2	2	3	4	No	3	2	2	2	2	1	Yes	inadequate time to review slides and prep, many stations required you time to grasp the concepts and integrate the information. it was difficult to do in the time frame provided. difficult to read the slides and process information and feedback.	require prep time before cases	staff at the college was extremely helpful	constantly stressing about the time restraints	no
2020-07-29 11:22:34	Yes	FCA(SA) Part II	Johannesburg	2	3	Appropriate	Too short	1	3	4	Yes	The Bronchopleural fistula station sound was not clear. Also, screens did not project x-rays clearly.	2	3	4	3	No	2	1	1	2	2	3	Yes	Bronchopleural fistula station Day 2 was poorly run/sound poor quality	Examiners must guide candidates if they have gone down the wrong path of interpreting a question and not simply continue blindly (like the bronchopleural fistula station day 2).	Being able to get this exam out of the way	Examiners not guiding candidates or allowing us to re-visit previous answers answered incorrectly.	2 minutes of preparation time on day 2 oral would have helped us to gather thoughts before being hit with questions.
2020-07-29 11:29:46	Yes	FCA(SA) Part II	Durban	5	4	Appropriate	Appropriate	4	4	3	Yes	1. screen sharing interrupted with examiners video needing to pause and correct, time not compensated 2. background wall distracting if using a backdrop 3. prefer reading own questions vs read by examiner as it takes time	4	4	1	2	Yes	3	2	3	3	3	1	Yes	visual issues, video was poor quality and not clear screen sharing interrupted	technical management and time compensation	Calibre of examiners was on par and professional	Technical interruption and time affected	Holding area was not up to standard, waiting time at the venue before an dafter exa was too long
2020-07-29 11:47:25	Yes	FCA(SA) Part II	Durban	1	1	Much too short	Much too short	1	3	3	Yes	There was a connection problem with some of the stations, at some stations I could not hear the examiner because there was a lag and small break. The video that was displayed to us with the rotameters were not clear and the video also didn't play out in sequence (there was a lag). There was NO prep time at all! So you had 10 minutes to read long essays, with a number of slides with reading materi…	1	2	3	2	No	1	2	3	3	1	1	Yes	Connection lags : ? wifi connection in approptiate ?too many participants on at the same time? Videos and pictures not projection well. No prep time... we need at least 3 minutes to read the case and conceptualise the scenario. Previously the crux of the scenario was given to you on a page and you could refer back to it if you needed to remind yourself of something, now you only had 1 chance to v…	Have prep time. Have the scenario printed out to have to refer back to. Print out investigations.	The CMSA invigilators were always trying their best to assist us. Excellent invigilators and Co-ordinator.	The 1 day was better, but the 2nd day had many issues.	Mentioned above.
2020-07-29 12:26:32	Yes	FCA(SA) Part II	Johannesburg	2	2	Appropriate	Too short	3	4	4	No		3	3	5	4	No	4	4	3	3	3	2	No		Longer exam time at stations	Nothing	Not being able to explain a practical skill in words.	The exam needs more clinical stations
2020-07-29 12:26:53	Yes	FCA(SA) Part II	Johannesburg	2	2	Too short	Too short	3	3	3	No		2	3	3	3	No	3	3	4	4	3	3	No		Allow more time for paper cases, use full screen for videos with examiners, have less time between stations waiting	not having to travel for exam	poor quality imagine of some special investigations, difficulty in demonstrating answers for some of the stations without having actual props/ equipment	no
2020-07-29 12:27:01	Yes	FCA(SA) Part II	Johannesburg	2	3	Appropriate	Appropriate	4	3	3	No		3	5	1	5	No	5	2	4	4	4	4	No		The materials depicted in the stations could be made available, such as a laryngoscope and double lumen tube for ease of demonstration.	College staff was very professional in managing the calls and keeping everything running smoothly and on time.	The station with the foreign body -the quality of the chest xray was poor quality. The proposed ball valve effect is unlikely given the clinical scenario of an aspirated foreign body being a piece of lego. The station with the requirement to do one lung ventilation was made overly complicated and not well suited to this type of exam. Having a double lumen tube and being able to demonstrate/identi…	.
2020-07-29 12:30:40	Yes	FCA(SA) Part II	Johannesburg	2	2	Appropriate	Too short	2	4	5	Yes	Flickering screen	2	3	3	4	Yes	4	2	4	4	3	2	Yes	Not resolved	Tailor the questions to the time allocation	Staff at CMSA were professional and made an effort to assist us	-The content of the questions did not lend itself to a virtual examination - for example if a demonstration of a device was required, then the device should be in the room. -The length of the questions and the vignette for the questions needs to be tailored to a ten minute station.	-The examination should have either a model or a device with which the candidate could demonstrate their skills (if the candidate is being asked to demonstrate use of such device) -Adequate resolution of images is also a necessity
2020-07-29 12:34:50	Yes	FCA(SA) Part II	Johannesburg	2	2	Much too short	Much too short	2	1	5	Yes	technical issues regarding flickering videos for the foreign body station the CXR was not clearly visible double lumen tube station: too long explanation by examiner regarding the labeling of DLT which wasted time to answer questions the examiner for the obstetric station was not easy to follow with her questions	2	3	5	3	Yes	3	2	2	2	2	1	Yes	technical issues regarding flickering videos for the foreign body station the CXR was not clearly visible double lumen tube station: too long explanation by examiner regarding the labeling of DLT which wasted time to answer questions the examiner for the obstetric station was not easy to follow with her questions	enlarge videos on the screen instead of some small square frame allow 2 minutes of reading the question on the door prior to entering the room like in the previous osce stations	none	technological problems questions were too long for allocated time theory covered does not reflect the full range of actual knowledge possessed	no
2020-07-29 12:36:35	Yes	FCA(SA) Part II	Johannesburg	1	1	Too short	Much too short	1	1	5	Yes	Sound was very bad in 2 stations from both the examiner and the candidate side. it was difficult to complete the exams in 10 minutes with technical challenges. I feel that it will contribute badly to exam mark because there was not enough time to answer all questions	1	1	5	5	Yes	1	1	1	1	1	1	Yes	The sound was very bad, it became clearer later with no need to call a technician	The College should just conduct the exams face-to-face with real patient to test the anesthetic skill. the virtual exams arenot working, technical problems, and some examiners were not helping at all to direct or probe further to help the candidate pass. some questions that were asked were not clear, and the some examiners were irritated or not interested to the candidate.	no positive experience at all, especially Day 2 exams were conducted unfairly.	The debriefing station, the teaching and the bronchopleural fistula station was conducted poorly. to do a clinical station, we need to demonstrate eg how to insert a DLB and clamping need to do it practical during exams	the Zoom exams did not test us the anaesthetic skills. it was unfair that the exams were postponed and rescheduled while we are frontlines and still expect us to do this exams
2020-07-29 12:42:16	Yes	FCA(SA) Part II	Johannesburg	2	2	Appropriate	Too short	1	2	4	Yes	The whole powerpoint presentation format is not suitable for this exam. One has to be able to assess special investigations and questions at your own pace and go back for review (ie. with a paper in front of you) which is impossible while the examiner is controlling the powerpoint. Sound quality was sometimes poor too. The examiner in bronchopleural fistula station today did not guide me or direc…	1	2	4	2	No	2	1	1	1	2	3	Yes	The CMSA invigilators were most helpful, although... The exam stations and content was not clearly presented in most cases including the communication station with Dr Reed not guiding what he wanted yesterday and the examiners from the stations today - bronchopleural fistula, shoulder surgery NIRS, TCI, Foreign body aspiration all rushing and interrupting me and pushing to finish as the questions…	Time appropriate questions (ie. not too many questions and info squeezed into 10 minutes). NOT EXPECTING US TO DISPLAY CLINICAL SKILLS AND TEACHING, WHICH ARE PRACTICAL, BY TALKING THROUGH IT! I'll never teach someone to intubate over a zoom call or telephone! Totally irrational.	That this is over.	The fact that the CMSA delayed our oral exam, changed the rules, changed the format and venue and keeping us in the dark for such a long time before formal communication in a time of Covid-19. International standards during this pandemic were to accept competence statements from HOD's and waive oral examinations. This approach by the CMSA to delay exams into a pandemic and then cancel the second …	Be careful. Litigation shall find you.
2020-07-29 14:09:43	Yes	FCA(SA) Part II	Cape Town	4	4	Appropriate	Appropriate	5	5	2	No		4	5	3	5	No	4	5	5	5	5	5	No		some stations require more time	Helped to be in the same room for every case.	Questions where one interpretation affects multiple answers.	no
2020-07-29 14:11:07	Yes	FCA(SA) Part II	Johannesburg	4	4	Appropriate	Too short	3	2	4	Yes	it was hanging at points	3	4	2	2	No	5	5	5	5	5	5	Yes	it was hanging	did it well though	was ok	time	good experience
2020-07-29 14:14:03	Yes	FCA(SA) Part II	Cape Town	4	4	Much too long	Too short	3	3	3	Yes	could not clearly hear the examiner at times	4	4	3	3	Yes	3	2	4	4	3	3	Yes	could not hear the examiner clearly	increase the time or limit clinical information to process	it was good to go through the exam	not visualizing some images clearly and some stations were too long so the examiner had to rush through the stations in order for us to finish ..we needed some maybe minute or 2 read through the clinical scenario and to prepare the answers	no
2020-07-29 14:14:05	Yes	FCA(SA) Part II	Cape Town	4	4	Appropriate	Appropriate	4	4	3	Yes	sound interruptions	4	5	3	5	Yes	3	4	5	5	5	5	No	sound breaks	less delays	its over	long waiting times	no
2020-07-29 14:15:37	Yes	FCA(SA) Part II	Durban	5	4	Appropriate	Appropriate	4	5	3	No		4	5	3	4	No	5	3	4	4	4	4	No		I thought it was good.	Less stressful over zoom than in person.	Short time in station. Long time between stations.	Very well done for first attempt.
2020-07-29 14:15:47	Yes	FCA(SA) Part II	Cape Town	3	4	Too short	Too short	3	4	1	Yes	disconnection in one station, poor quality images in some stations	3	3	4	4	No	3	2	4	4	3	3	Yes	disconnections, it was managed promptly	more time during exams as hearing the examiners at times is difficult, and some of them cannot hear us as well	good experience, well conducted	some technical glitches but were addressed promptly	no
2020-07-29 14:16:20	Yes	FCA(SA) Part II	Cape Town	3	2	Too short	Too short	2	5	5	Yes	connection problems, pictures and videos weren't always clear	2	2	5	2	No	2	1	2	2	1	1	Yes	frequent connection problems	better internet connection. have physical copies of the pictures and aids for us to take closer and clearer looks	examiners were friendly	frequent problems with the sound	no
2020-07-29 14:17:01	Yes	FCA(SA) Part II	Johannesburg	3	5	Too short	Too short	4	3	2	No		4	5	1	5	No	4	4	4	5	4	4	No		preparation time please,at least 5 minutes	it was pleasurable	long waits	nothing
2020-07-29 14:18:24	Yes	FCA(SA) Part II	Johannesburg	4	4	Appropriate	Appropriate	4	4	4	Yes	Osce station froze a few times, could not hear the examiner	4	4	3	4	Yes	4	4	4	3	3	3	Yes	ocse 1 the session froze afew times	nil to add	process was cost saving	none	none.
2020-07-29 14:19:16	Yes	FCA(SA) Part II	Johannesburg	4	4	Appropriate	Appropriate	5	4	4	No		3	3	3	3	No	3	4	4	3	3	2	No		less time spent in between cases.	most of the examiners were encouraging and pleasant.	One examiner was just interruptive and not give candidates a fair chance of speaking.	Dr Reed was not pleasant.
2020-07-29 14:19:53	Yes	FCA(SA) Part II	Johannesburg	4	4	Appropriate	Too short	4	4	3	Yes	the examiners froze at times and could not hear me	3	4	3	5	Yes	5	3	3	3	4	4	Yes	the examiners froze at certain times	more time if there are interruptions	well planned	question not clear	no
2020-07-29 14:20:16	Yes	FCA(SA) Part II	Durban	4	3	Too short	Too short	4	4	4	Yes	sation 6	3	4	4	5	Yes	5	4	4	4	4	4	Yes	sation 6	by more prepare canditate	see examiner on zoom	no	no
2020-07-29 14:23:18	Yes	FCA(SA) Part II	Johannesburg	3	4	Appropriate	Much too short	4	3	3	No		1	4	4	3	Yes	4	4	4	4	4	4	No		Lomger time	No	The laryngoscopy station was very confusing	No
2020-07-29 14:28:01	Yes	FCA(SA) Part II	Durban	4	4	Appropriate	Much too short	2	5	1	Yes	Signal loss, poor connection	4	3	5	4	No	3	3	5	5	3	3	Yes	Poor connection. Too long scenarios, especially the teaching station, lost time reading all the instructions. I felt it wasn't very clear exactly what I was expected to do and the given instruction I found confusing.	As above	Great Hosts	Technical glitches, examination time felt very short.	Nothing other than the above
2020-07-29 14:31:29	Yes	FCA(SA) Part II	Durban	4	4	Appropriate	Too short	4	4	2	No		4	4	3	4	Yes	4	4	5	4	4	4	No		Paper cases available at the station to refer back to the scenario	The representatives of the college hosting he exam were friendly and compassionate, easing the burden of the stress of the exam	Some examiners were abrupt, and did not direct the questions very well	No
2020-07-29 17:30:25	Yes	FCA(SA) Part II	Cape Town	4	4	Appropriate	Too short	4	4	2	No		4	4	5	3	No	3	3	3	3	3	2	No		More thorough preparation of the examiners. There was a very large discrepancy with the digital platform comfort between examiners.	-	For most of the cases, the time allocated was far too short. There should have been more time allocated to allow for the increased time taken for introductions, case explanation and reading over the digital platform.	Training, training, training. Inconsistent examination with different examiners doing the same questions leads to an enormously different station experience.
2020-07-29 17:30:32	Yes	FCA(SA) Part II	Cape Town	3	3	Appropriate	Too short	4	2	1	No		4	5	5	5	No	5	4	5	5	4	3	No		bit longer station times.	Local exam with no travel and accommodation issues	Feeling unable to give a proper account of my knowledge. There is no room for clinical discussion or arguments when answering against a rubrick all the time. Maybe one or two stations would be valuable where there's no rubrick and just a discussion around a topic or a case etc.	No
2020-07-29 17:30:37	Yes	FCA(SA) Part II	Cape Town	4	4	Appropriate	Too short	3	5	2	No		3	2	5	3	Yes	4	2	4	3	2	2	No		time should be increased for each station	i cant think of any	misinterpreting the questions based on pictures which were not adequate	time is limited so information or questions need to be limited. questions need to be direct and not broad and confusing
2020-07-29 17:32:00	Yes	FCA(SA) Part II	Durban	4	4	Too long	Appropriate	3	3	4	Yes	internet connection	3	3	3	3	No	3	3	4	3	3	3	Yes	internet connection	have prep time for cases	nil	no prep time	no
2020-07-29 17:35:11	Yes	FCA(SA) Part II	Johannesburg	5	5	Appropriate	Appropriate	5	5	5	No		5	5	2	5	No	5	5	5	5	5	5	No		long waiting hours , some sweets and something to drink would help	less anxiety as examiners are not present with me	long waiting hours	none
2020-07-29 17:35:28	Yes	FCA(SA) Part II	Durban	5	5	Appropriate	Appropriate	4	3	3	Yes	Dr Jacob internet connection was not good - i had to repeat some answers	5	3	1	4	No	4	4	3	3	4	3	Yes	D Jacob station	Nil, The CMSA admin staff were excellent and super friendly	CMSA facilitators were excellent	Stress:)	No
2020-07-29 17:36:35	Yes	FCA(SA) Part II	Cape Town	5	4	Appropriate	Too short	4	4	4	No		4	4	3	4	No	5	5	4	3	3	3	No		choose examiners well	finally finished the exam	sometimes I had to repeat myself	no
2020-07-29 17:37:55	Yes	FCA(SA) Part II	Johannesburg	5	4	Appropriate	Appropriate	5	5	1	No		5	5	1	5	No	5	5	5	5	5	5	No		Have typed physical copies of the scenarios	It was well run and very smooth. There was no moving around to different rooms which reduced stress	Not having the printed copies	no
2020-07-29 17:38:22	Yes	FCA(SA) Part II	Durban	5	5	Appropriate	Appropriate	2	4	2	No		4	5	2	4	No	5	3	5	5	5	5	No		No	No travel	None	No
2020-07-29 17:38:58	Yes	FCA(SA) Part II	Johannesburg	4	1	Appropriate	Appropriate	4	4	1	No		5	5	1	5	No	5	5	3	3	4	1	No		some scenarios were very long and needing a single word answer	no need for face to face	none	none
2020-07-29 17:39:38	Yes	FCA(SA) Part II	Johannesburg	5	5	Too short	Too short	5	5	5	No		5	5	1	5	No	5	5	5	5	5	5	No		larger visuals	the smoothness of proceedings	nil	no
2020-07-29 17:44:05	Yes	FCA(SA) Part II	Durban	3	3	Appropriate	Appropriate	3	3	3	Yes	internet connection was very poor, interruptive during the exam	3	2	3	2	No	1	2	3	3	3	3	Yes	poor internet connection	better internet connection	invigilators	poor internet connection - very disruptive	improve internet
2020-07-29 18:15:14	Yes	FCA(SA) Part II	Johannesburg	3	2	Appropriate	Much too short	3	5	5	No		1	3	4	2	No	4	3	4	4	4	4	No		Longer time for answering	We could do the exam durung this time	No clear guidance on some stations as to what was really need..Specifically laryngoscpe where we has to teach a nurse and also for the debriefing station in a patient that had myasthenia gravis..The time was not enough to discuss what went wrong in the case and debrief at the same time.	Longr time for answering
2020-07-29 18:40:45	Yes	FCA(SA) Part II	Johannesburg	4	5	Appropriate	Appropriate	5	5	1	No		5	5	1	5	No	5	5	3	5	5	5	No		Was good	No technical problem, good quality examination	Waiting	No
2020-07-29 19:12:32	Yes	FCA(SA) Part II	Port Elizabeth	4	4	Much too short	Much too short	3	3	2	Yes	Signal breakdown on Wednesday with a lag and break in communication with examiner	4	4	4	4	No	3	3	3	4	3	4	Yes	Continued with exam. Time ran out	Time warning. Some questions were vague	Most examiners were friendly.	Felt a bit intimidating and under pressure	Timer visible on screen.
2020-07-29 21:09:27	Yes	FCA(SA) Part II	Bloemfontein	4	5	Appropriate	Appropriate	4	4	2	No		4	4	4	5	No	4	4	5	5	4	3	No		If a piece of equipment needs to be discussed or demonstrated to maybe have that physically available instead of pictures with many labels	Examiners were neutral but friendly. Sets ones nerves at ease.	One of my zoom calls were delayed from the examiners side. It does affect ones nerves, but the invigilator and tech support sorted it out promptly	No
2020-07-29 23:01:01	Yes	FCA(SA) Part II	Johannesburg	2	3	Appropriate	Appropriate	3	3	3	No		3	4	2	5	No	4	3	4	3	3	5	No		It was well organized	Saving time and cost	Waiting for long time	No
2020-07-30 08:19:02	Yes	FCA(SA) Part II	East London	5	4	Appropriate	Too short	5	5	5	Yes	time delays in starting the next station but the team tackled it quickly so went well after	5	5	5	4	No	4	4	5	5	4	5	Yes	time delay in starting but the technical team was very helpful	i think it was conducted well overall	i got to do the exam at our center so cost effective and time efficient	nothing really	i think you guys did well ... and thank you for thinking about us in these hard times and being able to do the exam for us...i personally truly appreciate
2020-07-30 14:56:39	Yes	FCA(SA) Part II	Cape Town	2	2	Much too short	Much too short	2	1	5	Yes	1. Question slides did not show. 2. Examiners had technical issues which wasted time- time which was not given back to the candidate for answering. 3. Examiners asked questions only. Many were repetitive and did not take into account that you had possibly answered the following questions with your first answer. 4. No discussion what so ever in any of the stations. No adjustment of questioning to …	1	1	5	2	No	1	1	1	1	1	1	Yes	Slides didn't show. Momentary skips in audio- had to waste time by asking the examiner to repeat the question (this wasted time is not given back to the candidates)	please don't use Zoom for future exams. This was a very disappointing and poor assessment of a specialist.	none	10 minutes to answer 7 complex questions! Being a very strong candidate there simply was not sufficient time for me to give them all the knowledge I had. Despite talking quickly and keeping as much to the point as possible. The one station (Paper case with CHD patient/ child)- we spent the full 10 minutes of preparation time navigating through the 5 very dense slides of patient information. With …	Extra time needs to be provided. 10 minutes to answer multiple dense topics and account for technical glitches or having to repeat your answers to the examiners means we cannot answer to the best of our abilities.
2020-08-01 11:31:26	Yes	FCA(SA) Part II	Durban	3	4	Too short	Too short	3	5	5	Yes	In one station to try share slide but about minute	3	4	4	5	No	4	4	5	4	5	5	Yes	Only in one station to try share zoom	One with you in the room to sort any technique problem	Improve my technique skills	Examiners not with you in same room	One with you in the room to sort any technique problem
2020-08-03 15:08:22	Yes	Cert Reproductive Medicine(SA)	Cape Town	5	5	Appropriate	Appropriate	5	5	5	Yes	poor network in the library rooms but we survived	5	5	1	5	No	3	5	5	5	5	5	Yes	technical issues with freezing screening but i will still choose zoom or personal examination	i was satified	my examiners were very nice people and friendly	norhing	no
2020-08-03 15:44:15	Yes	Cert Reproductive Medicine(SA)	Cape Town	5	5	Too long	Appropriate	5	5	1	No		5	5	3	5	No	5	5	5	5	4	4	Yes	Could not log on several times. Delayed exam by 30-40 minutes	maybe keep examiners logged into on room, and move candidates in rooms	good coverage of material	time delays.
2020-08-03 16:19:23	Yes	Cert Reproductive Medicine(SA)	Johannesburg	5	5	Too long	Appropriate	5	3	1	No		4	5	3	5	No	5	5	5	5	5	4	No		Keep it up	Everything technical went well	overall duration of the exam	no
2020-08-04 10:53:01	Yes	FCOG(SA) Part II	Cape Town	5	5	Appropriate	Appropriate	5	4	3	No		4	4	3	4	No	4	4	5	4	4	3	No		training of the candidates on how to use zoom	calm environment & not being pressured by the examiners	there was a confusion on time allocation for preparation and zoom meeting	no
2020-08-04 11:16:09	Yes	FCOG(SA) Part II	Cape Town	3	3	Appropriate	Appropriate	4	3	1	No		3	4	3	5	Yes	4	4	5	5	5	5	No		more time for preparation	reflection on 4 years of training	covid	no
2020-08-04 14:27:45	Yes	FCOG(SA) Part II	Cape Town	3	3	Too long	Too short	4	4	1	Yes	interruption during the examiner meeting on one occassion and unable to slide share at a second station	3	3	3	4	No	4	3	5	5	4	3	Yes	IT support on standby	more practise	didnt need to travel out of Cape Town	IT technical difficulties	No
2020-08-04 14:44:34	Yes	FCOG(SA) Part II	Cape Town	4	4	Appropriate	Appropriate	4	4	2	No		4	4	1	4	No	4	4	5	5	4	3	No		I don't see the need to make any improvements	Being local was nice. IT for me was working well.	No negatives	Well done in these times!
2020-08-04 14:47:15	Yes	FCOG(SA) Part II	Cape Town	4	4	Appropriate	Appropriate	4	4	2	No		4	4	2	4	No	4	4	4	4	4	4	No		none	none	none	none
2020-08-04 17:59:15	Yes	FCOG(SA) Part II	Cape Town	4	4	Appropriate	Appropriate	4	4	2	Yes	During one of my ospes I think the sound was not adequate - I was worried that the examiner could not hear me properly as I had to repeat myself and noted that he heard me wrong. This made me very anxious.	4	3	4	5	No	4	4	4	4	4	3	Yes	My 1st examiner had difficulty hearing me. It seemed to improved during the session. I mentioned it to the assistent and she said I must try speak into the microphone. The other sessions went fine	It was well done. XR image was a bit small - would have liked to be able to zoom in in order to see better.	It was not as bad as I anticipated.	Being worried and anxious about technical things.	It went ok. Great assistents.
2020-08-04 18:21:18	Yes	FCOG(SA) Part II	Cape Town	5	5	Appropriate	Appropriate	4	3	3	Yes	Lots of disruption in my connection, unstable internet connection. Also delay in getting examiners online in 2 out of 4 of the cases	4	4	4	4	No	4	4	4	4	4	3	Yes	Call interrupted by poor quality internet connection multiple times	Improve quality of call	Not having to travel and stay in a strange place for my exam	Delays in getting the examiners online, after I had had my time to prepare for it. It definitely added to my anxiety and made the experience more stressful.	No
2020-08-05 10:52:18	Yes	FCOG(SA) Part II	Durban	4	4	Appropriate	Appropriate	4	3	1	No		4	4	2	5	No	4	4	4	4	5	5	No		Nil suggestions	Nil	Certain examiners provide absolutely no guidance or prompting and merely stare at candidates. Unacceptable approach	nil
2020-08-05 10:56:05	Yes	FCOG(SA) Part II	Durban	5	5	Appropriate	Appropriate	5	5	4	Yes	in my third case yesterday ( malposition case- OP ) there were some question asked to some colleagues and i never been asked this question ( although i finished before the end of my time , so there was extra time i left )	4	5	3	5	No	5	5	3	4	4	4	No		NIL	questions are fair	nil	nil
2020-08-05 11:01:28	Yes	FCOG(SA) Part II	Cape Town	4	4	Appropriate	Appropriate	4	4	3	Yes	first station was sound issue, last station was delay in the connection	4	4	4	4	Yes	3	4	4	4	4	4	Yes	sound and connection to zoom	training	the environment is friendly	connection issues	no
2020-08-05 11:11:07	Yes	FCOG(SA) Part II	Durban	5	4	Appropriate	Appropriate	5	5	2	No		4	5	1	5	No	5	5	5	5	5	5	No		perfect as they are	less anxiety, less cost	the prolonged stay after the examination is complete	no
2020-08-05 11:15:47	Yes	FCOG(SA) Part II	Durban	4	4	Appropriate	Appropriate	5	5	1	No		4	4	2	4	No	5	5	5	4	5	4	No		Due to lack of in person examiners, examiners need to be engaging and acknowledge the participants response. Not guide or prompt, but make it clear to the participant that they could be heard. Examiners should have their phones off and not be distracted by other factors if examining form home.	IT support and Durban office staff were very helpfull and calming	One examiner did not look at me, did not acknowledge me throughout, so it was difficult to know if i was heard, she only spoke and looked at the screen to ask a question, also after discussion with fellow students, she had asked questions to them that I did not get the opportunity to be asked. There was enough time left to ask that question	No
2020-08-05 11:17:53	Yes	FCOG(SA) Part II	Cape Town	3	5	Appropriate	Appropriate	4	4	1	No		3	5	4	4	Yes	4	4	5	5	5	5	No		Some questioning by examiners is ambiguous, and some are threatening	new format and was comfortable taking exam cape town	intimidating questions from some examiners, makes candidate loss focus during the exam	no
2020-08-05 11:34:37	Yes	FCOG(SA) Part II	Johannesburg	3	3	Appropriate	Appropriate	5	5	1	No		3	5	1	5	No	5	5	5	5	5	5	No		well run	good experience	does lose some of the interpersonal contact. Can be distracting if the examiner doesn't look at the camera/interact	No
2020-08-05 11:36:57	Yes	FCOG(SA) Part II	Johannesburg	5	4	Appropriate	Appropriate	5	5	1	No		5	5	1	5	No	5	5	5	5	5	5	Yes	There was some miscommunication about the time allocation (20/15 min) and 1 of my examiners went slowly as she thought that we had longer than we did	Streamline the system so that we can stay in the room between prep and exam	I was more comfortable at home, it was very fair	The breast cancer question did not feel like a general obstetrics questions	Try to have more candidates examined at one time to avoid the first group having to sit in quarantine for 3.5 hours after the exam
2020-08-05 11:36:59	Yes	FCOG(SA) Part II	Johannesburg	5	5	Appropriate	Appropriate	5	5	1	No		5	5	2	5	Yes	5	5	5	5	5	5	No		So far so good	Conducting the examination without the stress of travelling far.	None	Congratulations to CMSA for coming up with plan B during this difficult time.
2020-08-05 11:37:37	Yes	FCOG(SA) Part II	Johannesburg	4	5	Appropriate	Appropriate	5	5	3	No		4	5	3	5	No	4	4	1	5	4	3	Yes	Sometimes it would appear as though an examiner has frozen on the screen where their broadband signal had become temporarily weak. This did not disturb the call entirely given we had the buffer 5 minutes in case of technical glitches	Ensure all examiners have strong wifi signals	Having the examination scheduled this year and not next year after COVID. Time for preparation and the examination were adequate.	Having to travel to johannesburg for the exam, when it could potentially have been administered all over.	The CMSA staff were very helpful thank you
2020-08-05 11:37:54	Yes	FCOG(SA) Part II	Johannesburg	2	2	Appropriate	Appropriate	2	3	2	No		2	3	3	4	Yes	4	4	3	3	3	3	No		some questions were to vaque	the experince	question outline	no
2020-08-05 14:21:54	Yes	FCOG(SA) Part II	Durban	4	4	Appropriate	Appropriate	5	5	1	No		4	4	2	4	No	5	5	5	4	5	4	No		Due to lack of in person examiners, examiners need to be engaging and acknowledge the participants response. Not guide or prompt, but make it clear to the participant that they could be heard. Examiners should have their phones off and not be distracted by other factors if examining form home.	IT support and Durban office staff were very helpfull and calming	One examiner did not look at me, did not acknowledge me throughout, so it was difficult to know if i was heard, she only spoke and looked at the screen to ask a question, also after discussion with fellow students, she had asked questions to them that I did not get the opportunity to be asked. There was enough time left to ask that question	No
2020-08-05 14:21:58	Yes	FCOG(SA) Part II	Johannesburg	5	5	Appropriate	Appropriate	5	5	5	No		5	5	5	5	Yes	5	5	5	5	5	5	No		As a first i think this was smooth and well run	The amount of time for preparation was enough	None	The examiners were not confrantational in their approach
2020-08-05 14:23:55	Yes	FCOG(SA) Part II	Johannesburg	5	5	Appropriate	Appropriate	5	5	1	No		5	4	4	5	Yes	4	4	4	4	4	3	No		combine zoom and personal stations	broad spread of topics	difficult examiner without prompting to guide direction in one case	nil
2020-08-05 14:24:11	Yes	FCOG(SA) Part II	Johannesburg	3	4	Appropriate	Appropriate	4	2	1	No		4	5	2	5	Yes	5	5	5	5	5	5	No		all the questions should be presented at the begining	the zoom meeting was less stressful, i am generally anxious, i was less anxious	once the audio was not good, but it was a matter of positioning, otherwise technically it was smooth	no
2020-08-05 14:24:31	Yes	FCOG(SA) Part II	Cape Town	2	2	Much too long	Too short	3	3	3	No		2	3	3	3	No	3	3	4	4	3	3	No		more time with the examiner	no travel out of Cape Town in a COVID pandemic	no rapport with the examiner	no
2020-08-05 14:30:56	Yes	FCOG(SA) Part II	Durban	5	5	Appropriate	Appropriate	5	5	1	No		5	4	4	5	Yes	5	5	5	5	5	5	No		i dont have idea , my was good	it was ok	statist question two tablet too long	no
2020-08-05 14:34:15	Yes	FCOG(SA) Part II	Durban	5	5	Appropriate	Appropriate	5	4	1	No		5	5	1	5	No	5	5	5	5	5	5	No		it is a matter of practicing and improving	time saved from travelling and the setup is well organized	nil	no
2020-08-05 14:45:10	Yes	FCOG(SA) Part II	Johannesburg	3	4	Too long	Appropriate	4	3	1	No		4	5	1	4	No	4	4	4	4	5	5	No		Well done	Everything was clearly presented	Three long days.	Generally well done
2020-08-05 14:45:28	Yes	FCOG(SA) Part II	Johannesburg	5	3	Appropriate	Appropriate	5	5	3	No		4	5	2	5	No	5	5	5	5	5	3	No		x	x	x	x
2020-08-05 14:50:00	Yes	FCOG(SA) Part II	Johannesburg	4	4	Appropriate	Appropriate	4	4	4	No		3	5	1	5	No	5	3	5	5	3	5	No		N/a.	not spending money travelling	anxiety	n/a
2020-08-05 14:51:34	Yes	FCOG(SA) Part II	Cape Town	4	3	Appropriate	Appropriate	3	3	3	Yes	link breaking in between	3	4	3	4	No	4	3	4	4	4	4	Yes	line breaking inbtween	none	none	none	no
2020-08-05 14:52:18	Yes	FCOG(SA) Part II	Durban	5	4	Too long	Appropriate	4	5	1	No		4	4	3	5	No	4	4	5	5	5	4	No		subminimals should be scrapped off	friendly examiners	nil	nil
2020-08-05 14:55:37	Yes	FCOG(SA) Part II	Johannesburg	1	5	Too long	Appropriate	4	4	3	No		4	5	2	4	No	5	5	3	3	4	4	No		allow candidates to take the exam from all the centers they are based	zoom environment was relaxing	having to type my answers on the computer.	none
2020-08-05 15:12:14	Yes	FCOG(SA) Part II	Cape Town	4	3	Appropriate	Appropriate	4	4	3	Yes	Call dropped due to power failure at examiners side	4	4	1	4	No	4	4	5	5	4	4	Yes	Dropped call with subsequent rescheduling of station ,and next station was delayed also	I dont think there is a way to improve	Being local, cost saving, IT department worked well	I was a bit flustered today with the shuffling of cases	No
2020-08-05 17:46:21	Yes	FCOG(SA) Part II	Durban	5	4	Too long	Appropriate	4	5	1	No		4	4	3	5	No	4	4	5	5	5	4	No		subminimals should be scrapped off	friendly examiners	nil	nil
2020-08-05 17:49:01	Yes	FCOG(SA) Part II	Johannesburg	4	4	Appropriate	Appropriate	4	4	2	No		4	4	2	4	No	5	4	5	5	5	5	No		well done	invigilators were helpful, examiners were kind, there was enough time to prepare	none	none, thank you
2020-08-05 17:49:24	Yes	FCOG(SA) Part II	Johannesburg	5	5	Appropriate	Appropriate	5	5	2	No		5	4	2	5	No	5	5	5	5	5	5	No		I found everything well planned considering that it's the first time we do this	everything was well organised so that alleviated my anxiety	no	no
2020-08-05 17:49:27	Yes	FCOG(SA) Part II	Johannesburg	5	5	Appropriate	Appropriate	5	5	5	No		5	5	1	5	Yes	5	5	5	5	5	5	No		provide food for us	good time keeping	No food	no
2020-08-05 17:50:01	Yes	FCOG(SA) Part II	Johannesburg	3	3	Appropriate	Appropriate	4	3	2	No		4	3	3	5	No	4	4	5	4	4	4	No		nil	relaxed	non	non
2020-08-05 17:54:28	Yes	FCOG(SA) Part II	Durban	4	3	Appropriate	Appropriate	5	4	1	No		4	5	2	5	Yes	5	5	5	5	4	4	No		The set up was good	NIL	NIL	NO
2020-08-05 17:57:55	Yes	FCOG(SA) Part II	Cape Town	4	4	Appropriate	Appropriate	4	4	2	No		3	3	4	4	No	4	3	4	4	3	3	No		Shorter waiting time between questions.	It was possible doing it on zoom.	It sometimes felt as if the examiners did not hear everything that I said or misheard me. That makes me anxious about whether they hear me correctly.	Extremely stressful due to the added stress re potential and actual technical difficulties. But a very good effort and appreciate that the exams was not postponed. Thank you.
2020-08-05 18:02:29	Yes	FCOG(SA) Part II	Durban	1	1	Too long	Too long	1	5	1	No		1	5	5	5	No	5	5	5	5	5	5	No		.	.	.	.
2020-08-05 18:08:20	Yes	FCOG(SA) Part II	Durban	4	3	Much too long	Appropriate	4	2	4	No		3	4	3	5	No	5	4	4	4	4	4	No		no need for improvement	no need to travel far for the exam	waiting for long time to start exam	no
2020-08-05 18:13:33	Yes	FCOG(SA) Part II	Cape Town	4	4	Appropriate	Appropriate	4	3	3	No		3	4	5	4	No	4	4	4	4	4	3	No		Ensure bandwidth is enough for exam to proceed smoothly. Ensure examiners log in on time for sessions	Being able to stay at home during the exam	It took very long, the process inbetween prep and exams felt tedious	No
2020-08-05 18:14:34	Yes	FCOG(SA) Part II	Johannesburg	3	4	Appropriate	Appropriate	3	4	1	No		3	5	2	5	No	5	4	1	1	3	3	No		possibly offer it in other countries	smooth	travelling from my country , quarantine	consider offering in other country centre . why travel to be on a computer if there are no live stations
2020-08-05 18:16:48	Yes	FCOG(SA) Part II	Johannesburg	4	5	Appropriate	Appropriate	4	3	1	No		4	4	2	5	No	5	5	5	5	5	5	No		continue with zoom exam	less stress	nothing	continue with zoom
2020-08-05 18:19:45	Yes	FCOG(SA) Part II	Johannesburg	5	5	Appropriate	Too long	5	4	1	No		5	5	1	5	No	5	5	5	5	5	5	No		The waiting period between my third and fourth case was WAY too long on both days	The examiners were friendly :)	Having to adjust from asking for all the details during the conversation, versus having it on the case already. Took mental adjustment. one case they want you to ask vitals next one they dont. it was confusing. i lost marks in some places	No i just hope i passed lol... Thank you for this experience. thank you for your hard work, we appreciate it
2020-08-06 15:13:04	Yes	Cert Cardiology(SA) Phys	Johannesburg	4	4	Much too long	Too short	3	4	3	No		3	4	3	4	No	3	2	4	4	4	4	Yes	Some of the angiogram images were not very clear.	Better quality images and some questions were a bit unclear	Nil	Too little time during the written component, especially the angiography parts where you cannot write short answers when the questions are that broad- Like discuss coronary lesions seen. Its basically asking for a full angio report in a few minutes. We were also advised that during the oral it would not be interpretation, but clinical approach, which I feel was not the case.	n
2020-08-06 15:18:13	Yes	Cert Cardiology(SA) Phys	Cape Town	3	4	Too short	Appropriate	2	3	2	Yes	The was bad feedback in one of the sessions and then for last session the examiners didn't seem to be well co-ordinated and the cases were not printed out and numbering was confusing as well as the pace of questioning	2	3	1	4	Yes	3	2	4	4	4	5	Yes	I have mentioned them above	make the zoom calls be done at CMSA centres to adequately control for sound and projection	I could do exam locally and did not have to deal with examiners face to face	The feedback and having such a long OSCE before the oral exam it is like having 2 written papers in a day	Make sure the exams are adequately moderated and make sure centres teach their candidates and not such use them as cheap labour (I am a supernumerary and have to struggle to make it)
2020-08-06 16:40:46	Yes	Cert Cardiology(SA) Phys	Cape Town	4	3	Much too long	Appropriate	2	3	1	No		2	3	2	5	No	5	5	5	5	2	5	No		moderators avail themselves	less intimidating	examiners facial expression were blunt	we need to get a way where we eliminate human nature biasness and embark on MCQ
2020-08-06 17:05:22	Yes	Cert Cardiology(SA) Phys	Johannesburg	5	5	Appropriate	Too short	4	5	4	No		4	5	3	5	No	5	4	5	5	4	4	No		I think the exam was conducted well	Written part was very fair	The echo images in AS patient could have been better.	No
2020-08-06 17:09:45	Yes	Cert Cardiology(SA) Phys	Cape Town	5	5	Appropriate	Appropriate	5	3	3	No		4	5	2	5	No	5	5	3	3	5	4	No		It was pretty well conducted.	Fair cases, good visuals.	Nothing specific.	The structured oral was done well.
2020-08-06 17:10:19	Yes	Cert Cardiology(SA) Phys	Johannesburg	5	4	Too short	Too short	5	5	4	No		4	5	3	5	No	5	4	5	5	5	3	No		Shorten the exam day	Written part was very fair and the oral not bad at all	Time allocation for the written component was a bit short. Especially taking into account the time it takes to review angiogram	Well done. But day too long.
2020-08-06 17:13:36	Yes	Cert Cardiology(SA) Phys	Johannesburg	2	4	Much too long	Much too short	5	3	1	No		3	4	1	5	No	5	4	5	4	4	5	No		time should be managed better for candidates. we should not be expected to function like robots. high certificate examinations should be cente.red more on discussion	it should be the future of examinations	That i was not able to finish my written examination due to time	no
2020-08-07 10:05:27	Yes	FC Path(SA) Micro Part II	Johannesburg	3	3	Much too long	Much too short	2	3	2	Yes	The Gantt chart was too broad, scrolling left and right to see the whole chart wasted time for me. It would have been better to have printed it out as short sighted people like myself had to zoom into the document from a screen that was big but a bit far therefore leading to scrolling left and right constantly to view the entire chat	3	4	3	5	No	5	4	3	4	4	4	No		The exam was well conducted. The time to analyze final day results was short though.	Cutting the number of days of having the practical exam, Time allocated to day 1 was very short though and the time allocated to the OSCE was too long. Day2 processing was also a bit long, could have shared the time from the OSCE and Day 2 to allocate more time for day 1 work.	Day 1 time too short, Asking for material or information to work on the cases and the response time was delayed.	Generally the Oral exam was well conducted. It would have been nice to allow electronic devices to be used before the exam and in between breaks. Not everyone scribbles notes in books.
2020-08-07 10:08:30	Yes	FC Path(SA) Micro Part II	Johannesburg	3	5	Too short	Much too short	3	4	1	No		2	5	1	5	No	4	3	5	5	5	5	No		please give us more time for the preparation.	2 day exam is better than 3 day but time for completing lab processing is and issue. I suggest 3 hour for Day 1 and 2 hours for day 2.	Delay in getting thing that i requesting in the Laboratory .e.g: reagents i needed(catalase) assist in making the decision	No
2020-08-07 11:06:11	Yes	FC Path(SA) Micro Part II	Johannesburg	4	5	Too short	Too short	4	5	3	Yes	We had a few delays on day 1 of the laboratory exam. Also, the time allocated for day 1 of the laboratory cases was too short, an extra 1 hour would have helped me to write down enough information needed to answer the questions.	4	5	1	5	No	5	5	5	5	5	5	Yes	One examiner joined late due to connectivity problems but the second examiner was able to ask all questions for both cases.	Ensure uniformity in the background of every examiner (some backgrounds are distracting). Maybe also have a set criteria for how close or far from the camera each person must be, so that it is uniform for all examiners.	I was comfortable having the oral in a Zoom meeting in a neutral venue that is outside the laboratory. I felt less anxiety than for face to face interactions. The OSCE on day 1 was done very well within COVID19 regulations and the questions were clear and the equipment was functional and the time was too long. We finished 1 hour before the allocated time for OSCE day 1.	Delays when asking for specimens or details about a case during the laboratory day of the test.	Nothing more.
2020-08-10 12:15:48	Yes	Cert Gastroenterology(SA) Phys	Johannesburg	4	4	Appropriate	Much too short	5	4	2	Yes	The timing of the stations were somewhat discrepant. There was ample time in the first 2 stations but the last 2 were much longer and allocated the same amount of time	4	4	4	4	No	5	4	4	4	4	3	Yes	Connectivity issues led to a delay in the exam	Work on the timing of stations. Ask examiners to provide a brief overview of the length of the station/number of questions in order to plan answers/timing accordingly	Besides the timing, otherwise well organized	It was an extremely long day as there were delays due to connectivity and candidates are not allowed to leave the venue	N/A
2020-08-10 12:23:29	Yes	Cert Gastroenterology(SA) Phys	Cape Town	5	5	Appropriate	Appropriate	5	5	2	Yes	Internet connection	5	5	2	4	No	5	5	5	5	5	3	Yes	Internet connection issues	Improve computer set up	Staff was very friendly and very helpful	Internet connection and audio ( speaker sound of laptop was very low)	None
2020-08-10 12:37:33	Yes	Cert Paediatric Neurology(SA)	Cape Town	5	4	Appropriate	Appropriate	5	5	3	No		5	5	4	4	No	5	4	4	4	4	3	No	no problem	More case scenarios	fair and good exam	no	no, alright
2020-08-10 12:41:30	Yes	Cert ID(SA) Paed	Cape Town	5	5	Appropriate	Appropriate	4	4	2	No		4	5	2	5	No	5	5	5	5	5	4	No		The exams centres should demonstrate use before exams	No need to travel outside exams centre	Opened extra online form and had to alert the local examiner	No
2020-08-10 12:41:30	Yes	Cert Gastroenterology(SA) Phys	Durban	2	3	Too long	Much too short	4	5	5	Yes	Words were covered with examiner feed.	4	4	2	1	No	3	4	5	5	1	1	Yes	I had to wait 5 hours before being examined the second half of the exam. This constituted 50% of the exam. This was a result of examiners dropping signal and decision by invidulators and examiners to carry on with all other candidates and coming back to my examination last. This had a significant negative impact on my performance. In my opinion in it was not managed fairly.	Allow more time to answer questions. Possibly by decreasing question numbers a little. Have adequate troubleshooting . Eg. Examiners should also be examining from exam centers. Thus if they drop signal then there is appropriate tech support available. Have back up internet providers and back up exam platforms so that if signals drops or systems do it work there is no time lag between exam questio…	I did not have to travel out of province.	The unacceptable time of approximately 5 hours that I had to wait between questions. This is not possible for any human being to endure.	There should be time available for candidates to go back to questions they may have completed. Tech support should be available for both candidates and examiners. Do not examine too many candidates on the same day.
2020-08-10 12:44:28	Yes	Cert Gastroenterology(SA) Paed	Cape Town	5	5	Appropriate	Appropriate	5	5	3	No		5	5	4	5	No	5	5	5	5	5	4	No		Continue the same practice	Friendly environment	No	No
2020-08-10 12:52:54	Yes	FCA(SA) Part II	Johannesburg	5	4	Appropriate	Appropriate	5	5	3	No		4	4	3	4	No	4	4	5	5	3	3	No		To try shorten the time between the long Day 1 cases	The examiners were clear and pleasant.	The laryngoscopy examiner interjected most of the time. It didn't help with staying focused but derailed train of thought.	A 5minutes prep time before the osce on day two may be beneficial.
2020-08-10 13:54:13	Yes	Cert Neonatology(SA)	Johannesburg	5	5	Appropriate	Appropriate	5	5	2	No		5	5	1	5	No	5	4	5	5	5	5	No		It was well conducted.	Less stress	None	No. I was completed satisfied
2020-08-10 14:44:04	Yes	FCORL(SA) Final	Cape Town	4	3	Appropriate	Appropriate	4	4	3	No		4	4	5	5	No	5	5	5	5	4	4	No		More videos	Less stressful	Having an extremely rare cases	No
2020-08-10 15:46:41	Yes	Cert Medical Oncology(SA) Paed	Johannesburg	5	4	Appropriate	Appropriate	4	4	1	No		4	5	1	5	Yes	5	5	5	5	5	5	No		I was not given paper to write on for my exam. The waiting area didn’t have a desk for me to wait on. Waited in the entrance hall of the CMSA.	The CMSA staff were kind. Found me a better waiting area that the entrance hall.	The waiting area	No
2020-08-10 15:56:14	Yes	FC Derm(SA) Part II	Cape Town	3	3	Appropriate	Too short	4	1	3	No		3	4	1	5	Yes	5	3	5	5	5	5	No		Increase time to view cases	Examiners were fair	Some of the cases were uncommon	No
2020-08-10 19:48:45	Yes	Cert Critical Care(SA) Paed	Cape Town	4	3	Appropriate	Appropriate	3	4	2	No		4	4	2	3	No	5	5	5	5	5	3	No		My one problem was that I had to choose between seeing the examiner or seeing the power point question as the examiner view would block the question. Consequently it felt more like a telephonic exam as I could hear the voices but not see them.	Not having to travel to a strange location saved both time and money.	The long wait prior to the exam.	No
2020-08-10 21:00:29	Yes	FC Path(SA) Haem Part II	Johannesburg	4	4	Appropriate	Appropriate	4	4	1	No		4	4	3	5	No	5	5	4	4	4	4	No		some of the cases were too detailed with too much information such as lab results. it was difficult to remember all the details and put together a differential in 5 minutes in the cases that had a lot of detain in the history . The shorter simpler cases were easier to digest. it would be better to get one case scenario at a time. towards the end, it became difficult to separate the cases in my mi…	great not having to travel and not having to worry about language barriers with a real patient.	non	fewer details on the slides would help if possible
2020-08-10 23:27:21	Yes	Cert Paediatric Neurology(SA)	Cape Town	5	5	Appropriate	Appropriate	5	5	4	No		5	5	3	5	No	5	4	5	5	4	2	Yes	some parts of the patient were hidden from view due to having only one camera angle	better video set up of longer cases and allow more time for viewing long cases	examiner interaction	lack of a physical patient	N/A
2020-08-11 12:25:09	Yes	Dip Obst(SA)	East London	5	5	Too long	Appropriate	5	4	3	No		5	5	4	5	No	5	5	5	5	5	5	No		decrease the waiting time in between the examiners if possible.	It was well organised	Waiting after finishing the exam for other people	No
2020-08-11 12:31:16	Yes	FC Rad Onc(SA) Part II	Cape Town	5	5	Appropriate	Appropriate	5	5	1	No		5	5	1	5	No	5	5	5	5	5	5	No		I was happy with the running of the Zoom exam	I found that having the examiners visible but not face-to-face made the exam less intimidating. Material was clearly presented	Not having a counter so I know how much time I had left during the examination	I hope this becomes the new standard, it is a good substitute for Face-to-face exams, it saves money and time and makes the exam less intimidating
2020-08-11 12:36:26	Yes	Dip Obst(SA)	Polokwane	5	5	Appropriate	Appropriate	5	4	1	No		4	5	1	3	No	3	4	5	5	5	5	Yes	first examiner was not audible and at one point the screen froze, but we resumed thereafter	improve the signal	saving on travel cost	none	no, everything was well organised
2020-08-11 12:47:38	Yes	Dip Obst(SA)	Polokwane	5	5	Appropriate	Appropriate	5	5	5	No		5	5	1	5	No	5	5	5	5	5	5	Yes	network	none	it was straight to the point	none	no
2020-08-11 12:56:38	Yes	Dip Obst(SA)	Bloemfontein	5	5	Appropriate	Appropriate	5	5	5	No		4	4	3	5	No	4	5	5	4	4	5	No		please do mock test to prepare candidates if posible	fair exam	none	continue the good work
2020-08-11 13:22:21	Yes	Dip Obst(SA)	Bloemfontein	5	5	Appropriate	Appropriate	5	5	4	No		5	4	4	4	No	5	5	5	5	5	3	No		If possible to have all 4 OSPE and the OSCE examination on the same day if logistically possible	Good organisation and management with friendly staff and invigilators	We were not fully sure what to expect with this examination given the circumstances but it was well provided and managed	Personally prefer live examinations but Zoom is an acceptable alternative
2020-08-11 13:48:20	Yes	Dip Obst(SA)	Bloemfontein	5	5	Appropriate	Appropriate	5	4	4	No		5	4	2	4	No	4	5	4	4	4	5	No	Not Applicale	Keep this format of examination but add a little more time for people who are not familiar with Zoom or online Material.	It takes off the examination stress	You have no idea if you are giving corrects or wrong answerers	It is fairly acceptable as we are moving towards digital.
2020-08-11 16:11:59	Yes	Dip Obst(SA)	Polokwane	5	4	Appropriate	Appropriate	5	4	2	No		5	4	2	5	Yes	5	4	5	5	5	5	No		invite more examiners	Easy and simple	waiting for too long before my turn comes	none
2020-08-11 16:36:35	Yes	Dip Obst(SA)	Bloemfontein	5	5	Appropriate	Appropriate	5	5	5	No		5	5	3	5	No	5	5	5	5	5	5	No		ensure that there are more examiners, the waiting is killing us	using the zoom for the exam was excellent experience in keeping with technology	none	everything went well but the number of examiners should be increased
2020-08-11 16:38:53	Yes	Dip Obst(SA)	Polokwane	5	5	Appropriate	Appropriate	5	5	3	No		5	4	2	5	Yes	5	5	4	4	4	3	No		none	to express my clinical skill	none	None
2020-08-11 16:59:39	Yes	Dip Obst(SA)	Bloemfontein	5	5	Appropriate	Appropriate	5	5	1	No		5	5	3	5	No	5	5	5	5	5	5	No		improved time table waiting time was long for the last candidate	get more confidence	waiting time for candidates was long	no
2020-08-11 17:05:57	Yes	Dip Obst(SA)	Cape Town	5	5	Appropriate	Appropriate	4	3	3	No		4	5	3	4	No	4	4	5	5	5	4	Yes	Only disconnected briefly but no great delay	Was good	Less daunting than having an examiner in front of you.	Unsure sometimes when to stop talking and allow time for questions as social ques are difficult to pick up	No
2020-08-11 17:34:03	Yes	Dip Obst(SA)	Cape Town	4	4	Too long	Too short	4	4	4	No		4	4	3	4	No	4	4	4	4	4	4	No		Allocate more time for the candidate	Improve the computer skills	Waiting too long	None
2020-08-12 11:14:42	Yes	FC Rad Onc(SA) Part II	Johannesburg	4	5	Appropriate	Appropriate	3	3	1	Yes	in previous examination candidates had the opportunity to review the information and gather their thoughts after seeing a real patient; now with scenarios there was no time given to review the information presented and think about it before the zoom oral	3	5	2	5	No	5	5	4	4	5	5	No		I think that for case orals candidates should get the case scenarios and documents for 10 minutes before the zoom oral with the examiners to formulate their assessment. This will better mimic the real life scenario	I did not need to travel anywhere	Not having time to review the case material and think about the case as in a real life patient	The written part was also not clear- gave feedback for that on a different link
2020-08-12 13:24:44	Yes	Dip Obst(SA)	Bloemfontein	4	5	Appropriate	Appropriate	5	4	3	No		5	5	3	5	No	5	5	5	5	5	5	No		continue Zoom exams as it is	exams virtual be than personal	none	continue good work
2020-08-12 13:28:48	Yes	Dip Obst(SA)	Bloemfontein	5	3	Appropriate	Appropriate	5	5	4	Yes	Mild problem with sound delays on the last oral but resolved on its own	5	4	4	5	No	5	5	4	4	4	3	Yes	Mild sound/signal issues with the last oral session that resolved on its own	If possible to increase the amount of examiners, I had no personal problems with bias but more examiners or combinations of them may contribute to making the process even more fair	It was convenient for me to remotely access the examination without having to travel far distances. The technology was reliable and the staff very friendly and helpful and the process moved well and with no problems	I feel that a diploma such as obstetrics requires a physical practical aspect with regards to demonstration of skills to ensure competence (oral methods are less effective than a real patient or doll to work on)	I feel it as an acceptable method in terms of covid-19 but I would still prefer a live practical aspect with an examiner
2020-08-12 13:49:13	Yes	Dip Obst(SA)	Cape Town	4	4	Appropriate	Appropriate	5	4	2	No		5	4	3	3	No	5	4	4	4	4	4	Yes	Brief interruptions	None	Well execute	None	None
2020-08-12 13:51:14	Yes	Dip Obst(SA)	Bloemfontein	5	5	Appropriate	Appropriate	4	4	3	No	None	4	4	1	4	No	4	4	4	5	4	5	Yes	Freezing at time	CMSA should continue running the exams in Zoom mode ; improve technical components.	Able to realize all relevant information pertaining to exam without fears / stress of real exams time	Freezing network at time	Keep it up it is an exciting innovation
2020-08-12 14:10:52	Yes	Dip Obst(SA)	Durban	5	5	Appropriate	Appropriate	5	5	3	No		5	5	2	5	No	5	5	5	5	5	4	No		nil	less anxiety from face-to-face exams	waiting period between exams, but understandable	nil
2020-08-12 14:15:53	Yes	Dip Obst(SA)	Durban	5	4	Appropriate	Appropriate	3	3	5	Yes	One examiner - Dr Molowane (excuse the spelling) had poor connectivitty. On my first OSPE she actually got dropped out of the call and returned later which was very stressful for both of us. Poor bandwith leads the screen to freeze and then you dont know if you should repeat or continue talking	5	4	3	5	No	4	5	3	4	4	4	Yes	As mentioned prior in both OPSES with Dr molokwana there was poor connectivity. The first she even got dropped out of the call, the second one had a lot more frozen frames and issues with continuous audio.	One OPSE in particular I though was very vague. The PPH station. The examiner and the way the question was phrased let you down a PPH management and not a maternal resuscitation in extremisis. management is different. I found the feedback and direction from the examiner more confusing and not contiguous with previous information ALSO OPSE 3 confused me because it was written as 100 marks where al…	Professional (always) friendly, courteous, always a pleasure	Connectivity issues and vague scenarios that felt a bit locked into a checklist rather than an appreciation for an approach which might be different than the marking algorithm	I think it would be more convienet to have the examiner show you a slide with the information you requested or show you the updated problems incase of poor connection or poor audio. Example: You asked for vitals and bloods, I will show the slide now with your results, how do these changes affect you diagnosis/managament?
2020-08-12 14:22:14	Yes	Dip Obst(SA)	Johannesburg	5	4	Appropriate	Appropriate	4	4	5	Yes	the zoom afternoon session i could not hear properly the examiner on the other side unfortunately he was also no patient and understandable which affect my concentration during his examination.	4	3	5	2	No	2	3	4	3	3	1	Yes	as mentioned the afternoon session , the examiner was not patient was difficult to hear him or to concentrate on the question	we only had problem with one examiner only one the rest was super excellent	the morning session examiner was very reliable , understanding	hearing the examiner in the afternoon session on both days	no
2020-08-12 14:31:00	Yes	Dip Obst(SA)	Johannesburg	4	4	Appropriate	Appropriate	4	3	5	No		4	4	3	3	No	3	3	4	4	4	4	Yes	examiner volume	better video	invigilators were friendly	one examiner was a bit intimidating	no
2020-08-12 14:42:12	Yes	Dip Obst(SA)	Johannesburg	5	5	Too long	Appropriate	4	4	2	Yes	Some of the examiners' internet connections were faulty, which caused a delay and difficulty in communicating the answers during the interview. The digital format as a whole was nice, but the lapse in connection made for a somewhat frustrating experience.	5	4	3	4	No	1	3	3	3	3	2	Yes	The connection to one of the examiners was very bad and the delay/ breaks in the call made for a difficult examination. It was also unclear how much of the information he received and therefore difficult to know exactly how to carry on. The call was reconnected but all in all the quality of the connection remained poor.	Ensuring adequate connection of the examiners during the zoom calls - perhaps providing a router to them if they do not have a reliable connection, or by setting up the examiners in one of the rooms at the venue and still conducting the exam via Zoom.	Seeing the examiner's face during the exam was helpful in terms of non-verbal feedback. The socially distant setup also made me feel safer.	Connection problem as mentioned above	All in all a very good idea in my opinion, the execution just needs to be smoothed out a but. The effort that was put in to make this experience safe and possible is highly appreciated!
2020-08-12 14:42:13	Yes	Dip Obst(SA)	Durban	5	5	Appropriate	Appropriate	5	5	1	No		5	5	2	5	No	5	5	5	5	4	4	No		cant really think of any now	it makes see the need to learn how to type on the computer fast	typing put some people at advantage... despite extra time given	none
2020-08-12 14:47:06	Yes	Dip Obst(SA)	Durban	5	4	Appropriate	Appropriate	5	2	3	Yes	The system went off line at some point approximately 2mins	5	4	3	5	No	5	5	5	5	5	5	Yes	went off line for approximately 2mins	Reduce the waiting time	a new experience is always a good one.	long wait time ...get drained and hypoglycemic	all stated above
2020-08-12 16:40:38	Yes	Dip Obst(SA)	Bloemfontein	5	5	Appropriate	Appropriate	4	5	4	No		5	4	3	5	No	5	5	5	5	5	5	No		increase examination time a little bit	carrying an exam in zoom was a great experience	none	increase the number of examiners so that there will less waiting
2020-08-12 17:03:37	Yes	Dip Obst(SA)	Cape Town	4	4	Appropriate	Appropriate	4	4	3	No		5	4	2	4	No	4	4	4	4	4	4	No		well done	all good	waiting time to be examined	good experience and fair examination
2020-08-12 17:26:14	Yes	Dip Obst(SA)	Durban	5	5	Appropriate	Appropriate	5	5	1	No		5	5	2	5	No	5	5	5	5	5	5	No		reduce waiting time on Day 1 of the exam	we were well taken care of and constantly updated on any changes	waiting times on day1	no
2020-08-12 17:28:52	Yes	Dip Obst(SA)	Durban	5	5	Appropriate	Appropriate	5	5	1	No		4	4	1	5	No	5	5	5	5	4	3	No		no improvement	everything was clear	none	no
2020-08-12 17:31:53	Yes	Dip Obst(SA)	Cape Town	4	4	Appropriate	Appropriate	4	4	3	No		4	4	3	4	Yes	4	4	4	4	4	4	No		More training at the different hospital before exam	Easy time of preparation	None	Improve system
2020-08-12 17:46:35	Yes	Dip Obst(SA)	Durban	2	2	Appropriate	Appropriate	2	2	3	No		1	3	2	2	No	2	2	2	2	2	2	No		Less waiting time between examinations. more examiners available. On day 1 i waited the whole day to be examined after 5pm sitting on a chair, it was exhausting	Close to home	Waiting for long periods on a chair for my exam, more comfortable settings can be used, ie maybe a couch, tv to relax us	no
2020-08-12 17:56:52	Yes	Dip Obst(SA)	Durban	4	4	Appropriate	Appropriate	4	4	2	No		4	4	2	4	No	4	4	4	4	4	4	No		keep up the good work.	the relief of not being intimidated by the examiner if he/she was in the room with me.	long waiting hours between 0SCEs and 0SPEs in very uncomfortable conditions.	provide adequate venue with areas of relaxation between exams
2020-08-12 18:17:18	Yes	Dip Obst(SA)	Johannesburg	5	5	Much too long	Appropriate	5	5	1	No		5	4	4	4	No	3	3	4	4	4	3	No		Improve video quality	precise timing of exams	Having to wait 3-6hours per day to complete my exams.	Please space candidates more logically and perhaps having 2 exams after each other and not having a 2-3hour delay between them
2020-08-13 08:34:33	Yes	Cert Critical Care(SA) Paed	Johannesburg	4	4	Appropriate	Appropriate	5	3	2	No		4	4	4	4	No	4	4	3	3	4	3	Yes	Having the two screens set up meant that whilst you were supposed to look in front of you, so the examiners then got the frontal view of your face meant that you couldn't look at the examiners or see the questions as they were projected on the screen to your right. So in my exam, the examiners could only see the side of my face as I was trying to look at the questions.	The "holding area" was completely inadequate. We were left to sit in the foyer with only chairs, not even desks. All candidates who are asked to be at the venue an hour before the start of an exam are going to bring material with to revise. A desk and a chair should have been made available. It was also freezing, I feel there should have been heaters provided so at least the candidates weren't so…	Communication from the invidulators was good when there were technical problems which resulted in a delay of our start	No desk provided whilst waiting for exam to start. The freezing cold rooms we were made to wait in	Desks and heater
2020-08-14 14:15:12	Yes	Cert Maternal and Fetal Medicine(SA)	Johannesburg	5	5	Appropriate	Appropriate	5	5	1	No		5	5	1	5	No	4	5	5	5	5	5	No		Very good process	Technical help was always available	None	None
2020-08-14 15:22:44	Yes	Cert Maternal and Fetal Medicine(SA)	Johannesburg	4	4	Appropriate	Appropriate	4	3	3	No		4	4	3	4	Yes	4	4	4	5	4	4	No		There was some difficulty with the examiner hearing some of my answers	Being on Zoom is less stressful than face to face	not being able to read the examiners body language	The various medical schools should offer trial/mock exams to get candidates used to this forum
2020-08-14 16:06:53	Yes	Cert Maternal and Fetal Medicine(SA)	Cape Town	5	5	Appropriate	Appropriate	4	4	3	No		4	4	3	4	No	5	4	5	4	4	4	No		appropriate	Having the exams locally	ADDITIONAL time for typing in OSCE not enough	ok
2020-08-17 21:45:35	Yes	FC Derm(SA) Part II	Durban	4	5	Appropriate	Appropriate	3	3	3	No		4	4	2	3	No	3	3	5	4	4	3	No		More structured questioning	Less stressful than face to face	Having to interpret pictures rather than live patient	No
2020-08-19 12:58:03	Yes	Cert Clin Haematology(SA) Path	Durban	5	4	Appropriate	Appropriate	4	4	3	No		5	5	2	5	No	5	5	5	5	5	5	No		n/a	i could write in my home town	nil	no
2020-08-19 13:37:53	Yes	Cert Clin Haematology(SA) Phys	Johannesburg	4	5	Appropriate	Too short	5	5	4	Yes	At times the examiners found it difficult to hear me. The examiners/moderators had episodes when they lost connection and went offline for a few minutes.	4	5	1	5	No	5	5	4	4	4	3	Yes	Please see responses on first page re: examiners not be able to hear me at all times and thier connections being lost on occasion.	Better connections on the examiners point of view, if possible.	Sitting, in a calmer environment than the usual stressful clinical environment. However, this does take away from the clinical component in that clinical skills assessment is made more difficult and this focusses mush more on interpretation and management.	Time issues. Felt like there was insufficient time to get through all that I wanted to say at times.	No
2020-08-20 12:44:57	Yes	FCNP(SA) Part II	Johannesburg	4	3	Appropriate	Appropriate	3	4	2	Yes	Some issues with audio in the third session	4	4	3	5	No	5	3	4	4	4	4	Yes	Audio issues in the third session	Better powerpoints from the examiners - use bigger images (use the whole slide)	I could do the exam this year	Uncertainty about the outcome	No
2020-08-20 13:00:50	Yes	FCNP(SA) Part II	Durban	3	3	Too long	Appropriate	3	3	4	Yes	Inability to interact with images, absence of dynamic imaging modalities on screen, upcoming questions are not known during the preparation time	3	4	2	5	No	4	4	4	5	4	4	Yes	The audio was at times unstable and this is challenging during question time.	The two day system be zoom instead of a single day would benefit the candidiate as all topic coverage can be overwhelming.	I am thankful that the final oral exams were not deferred completely due to the pandemic thenks to this teleconferencing modality.	Inability to interact with images and unavailability of dynamic acquisitions. There was no timer in the preparation room, so it was challenging to accurately allocate time to each case by candidate..	None
2020-08-21 15:54:26	Yes	Cert ID(SA) Phys	Cape Town	4	4	Appropriate	Appropriate	4	4	2	No		3	4	2	3	Yes	4	4	4	4	4	4	No		It is well organised	Structured questions	None	No
2020-08-24 17:22:02	Yes	FC Derm(SA) Part II	Cape Town	4	5	Appropriate	Too short	3	5	3	No		5	4	2	4	No	4	4	5	5	5	5	No		The quality of our histology slides were inadequate. The cmsa should moderate this	The cmsa staff were helpful and professional	The quality ofthe histology slides were inadequate. The medicine long case had 22 slides to read through in 20 min. This should have been moderated by the cmsa	Cmsa Cape Town branch was exceptional in their support on the day!
2020-08-24 19:59:07	Yes	FC Derm(SA) Part II	Cape Town	5	5	Appropriate	Appropriate	5	5	5	No		5	5	5	5	No	5	5	5	5	5	5	No		Well organized	Fair exam	Nil	no
2020-08-24 21:04:34	Yes	FCORL(SA) Final	Durban	3	4	Too long	Appropriate	2	4	3	No		4	4	1	5	No	5	4	5	5	3	2	No		Please read out the questions to the candidate because I was nervous and I was told this was my next case scenario and then there was silence and I was expected to read the scenario. I became more nervous and couldn't concentrate to read the scenario and that threw me off balance.	I felt that the examiners engaged with you more during the zoom meeting because there were no patients.There were a few stations were it was confusing to understand what the examiner was actually asking but I believe that is based on character traits or experience of that examiner.	Having seen my moderator and knowing that there was a 3rd person felt scary and nerve wrecking. Also being asked if I wanted to go back and change my answer and told I could do so, made me doubt what I had said. The nerves are same whether oral with patient or Zoom but the uncertainty of the Zoom exam content and execution was extremely nerve wrecking because this was the first time for an exam a…	Some examiners should practice their delivery of the case content as it comes across disjointed and confusing.
2020-08-24 22:09:57	Yes	Cert Cardiology(SA) Paed	Durban	5	5	Appropriate	Appropriate	5	5	3	No		5	5	2	5	No	5	5	5	5	5	3	No		I was happy with everything. Nothing to be improved.	Waking up at home prior to exam, familiar surroundings and cost cutting	Lack of round table contact with examiners	None.
2020-08-25 08:40:09	Yes	FC Path(SA) Chem Part II	Johannesburg	3	3	Too short	Too short	3	3	1	Yes	Sat in front of examiners for 15 minutes with a system that wasn’t working	2	4	3	5	Yes	5	5	5	5	4	3	Yes	The convenor’s had the glitch so he had to sort out his laptop	Not have exams on examiners laptop	Structured oral no interjections	Sitting in front of a computer with people looking at me and interruption from college stuff that my time was up	Cases paper should be allocated more time. Even provide paper . It hard to read 2 pages of a case from a screen and answer within 10 minutes
2020-08-25 09:26:32	Yes	Dip For Med(SA) Path	Cape Town	5	4	Appropriate	Appropriate	5	5	1	No		4	5	3	1	No	5	5	5	5	5	5	No		No problems experienced.	Questions were clear, sound was great. Timing was good. There were no delays or technical issues.	None	None
2020-08-25 09:36:59	Yes	Dip For Med(SA) Path	Johannesburg	5	5	Appropriate	Appropriate	5	5	5	No		5	5	3	5	Yes	5	5	5	5	5	3	No		There is nothing to improve, everything went well.	It was exciting	none	no
2020-08-25 10:08:53	Yes	Dip For Med(SA) Path	Johannesburg	5	5	Appropriate	Appropriate	5	4	4	No		4	2	2	4	Yes	4	4	2	2	3	2	No		N/A	The zoom meeting was run very smoothly	During the written in January, we experienced load shedding and the room was subsequently dark. This should have been anticipated and dealt with accordingly. I also think that since we had a practical examination yesterday in full PPE, dragging out the exam to another day was very inconvenient to me. It should have been done yesterday. Now I have had to expose myself and the staff members of the …	No
2020-08-25 10:19:52	Yes	Dip For Med(SA) Path	Cape Town	5	5	Too short	Appropriate	5	2	2	No		5	5	4	1	Yes	4	5	5	5	5	4	No		wider examiner panel	Cost saving, travel time saved, convenience	Time spent waiting in post-exam location, no specific arrival time given for oral exam	No
2020-08-25 10:48:58	Yes	Dip For Med(SA) Path	Johannesburg	4	5	Appropriate	Appropriate	5	5	2	No		5	2	4	3	No	5	5	5	5	5	5	No		No suggestions	The time for the exam was sufficient and well kept to. The staff were efficient.	Doing the oral examination and the practical examination over two days.	No additional feedback.
2020-08-25 10:56:35	Yes	FC Path(SA) Viro	Johannesburg	5	5	Appropriate	Appropriate	5	5	2	No		4	4	4	5	No	5	4	5	4	3	3	No		Hard copies of the data (and perhaps with associated questions) should be provided during the exam.	The examination was well organised; it has been a new enjoyable way of taking an examination.	The venue (particularly the waiting area) at which the examination was written was freezing cold! The last session was a matter of being there to complete the examination process - I just could not wait to be out of the venue - focusing and applying my mind to the questions and scenarios was just a nightmare. In addition, the time allocated was not adequate to attempt the questions to my satisfac…	With regard to the zoom oral exam, I think the candidate should know upfront how many questions s/he should expect to be asked, and roughly how many marks allocated to each question so s/he can be able to time him/herself.
2020-08-25 11:46:10	Yes	Dip For Med(SA) Path	Johannesburg	3	4	Appropriate	Appropriate	3	3	4	Yes	With the written part of the exam, the was load shedding which made it difficult for me to see what I was writing and no additional time was granted. The set up was not ideal for a 3 hours WRITTEN paper in that the venue was an auditorium and consisted of non mobile benches and desks. The height and the distance between the desk and the chair caused me physical exhaustion. By the time I was half …	3	3	3	1	Yes	5	4	1	3	3	3	No		Nothing in particular	The examiners were considerate and the communication from the college was clear.	The technical issue previously stated about the venue set up.	None
2020-08-25 12:22:00	Yes	Dip For Med(SA) Path	Johannesburg	5	4	Too short	Too short	4	3	3	No		4	2	5	1	No	5	5	3	3	1	1	No		we were promised a trial run which never happened.	We had already met with the examiners they should have continued.	ZOOM	None
2020-08-25 13:20:44	Yes	Dip For Med(SA) Clin/Path	Johannesburg	5	5	Too long	Appropriate	5	5	1	No		4	5	1	1	Yes	4	4	5	5	4	4	No		make it optional to use video	much more relaxed being alone in the room	none	none
2020-08-26 12:16:11	Yes	Cert Pulmonology(SA) Phys	Cape Town	5	4	Appropriate	Too short	5	5	1	No		5	5	1	5	No	5	4	5	4	4	4	No		The pandemic certainly put a spin on things and the CMSA has done well to have these exams under trying circumstances - so well done to the CMSA. For my exam, zoom was appropriate as there was no change in the format except the number of cases, but the format remained the same. CMSA could maybe improve the zoom quality , however for most people this was the first time it was done, so it will get …	I really enjoyed that the examination was recorded.I really enjoyed that the number of cases in the examination was increased as i think that one is able to get a good impression of a candidate if they are examined over broader spectrum rather that certain cases as depicted by the examiners, so that if a candidate does badly in one case they still have a shot at redemption.I think it was also gre…	The waiting at the exam venue until the last candidate was admitted into the exam.	Structured oral exam via zoom i think is appropriate for certificate exam if it doesn't affect the format. However, personally , i think for clinical examinations - this still needs patient interaction with external examiners. External examiners are crucial as this will limit bias and ensure transparency. It is a difficult terrain that CMSA is embarking on, however as much as it's difficult to ac…
2020-08-26 15:06:13	Yes	FC Urol(SA) Final	Johannesburg	5	5	Appropriate	Appropriate	5	3	3	No		4	4	2	5	No	4	5	3	4	4	4	No		examiners should be patient with the candidates because not everyone is used to this kind of communication	most exams were very helpful and friendly	not having food by the venue	it is a good initiative, must continue for the future
2020-08-26 15:06:34	Yes	FC Urol(SA) Final	Bloemfontein	4	4	Appropriate	Much too short	2	2	4	No		4	4	1	4	No	4	2	4	4	3	2	No		Unable to control the images, only snippets and snapshots instead of dynamic images.	Depth of knowledge examined.	Short time in OSCE	N/A
2020-08-26 15:07:14	Yes	FC Urol(SA) Final	Cape Town	5	5	Appropriate	Appropriate	5	5	4	Yes	Occasional difficulty with hearing the examiner. Very rarely interruption of the video feed	5	5	3	5	No	4	5	3	5	4	4	Yes	Resolved easily: video feed resumed without a long delay	No suggestions	Opportunity to be examined by many examiners	Not always being able to hear clearly. Not having the personal interaction	No
2020-08-26 15:56:11	Yes	FC Urol(SA) Final	Cape Town	5	5	Appropriate	Appropriate	3	5	2	Yes	Zoom picture was covering the one CT of the kidney. Comments by exmaintor to look at him when i spoke to him ( there is 2 screen to look at).	4	4	1	5	Yes	3	3	5	5	5	5	No		Have single computers with large screens with camera in one unit	To be finished	Not any	no
2020-08-26 16:05:57	Yes	FC Urol(SA) Final	Johannesburg	5	5	Too long	Appropriate	5	5	5	Yes	low signal at some point with poor sound quality	5	4	3	5	No	3	3	5	5	4	3	Yes	poor sound quality at times	better picture and sound quality	evrything	none	yes
2020-08-26 16:08:10	Yes	FC Urol(SA) Final	Johannesburg	5	5	Much too long	Appropriate	5	4	1	No		5	4	4	5	Yes	5	5	2	3	5	5	No		nil	not being in the same room as the examiners was calming	the exam was too long	they need to have refressments
2020-08-26 16:09:11	Yes	FC Urol(SA) Final	Durban	3	3	Appropriate	Appropriate	2	3	4	No		3	3	4	3	Yes	2	3	4	4	4	4	No		bigger screen and better sound system	Cost benefit	interaction between candidate and examiner	no
2020-08-26 16:11:16	Yes	FC Urol(SA) Final	Johannesburg	4	5	Appropriate	Appropriate	3	5	4	No		4	4	5	4	No	4	3	4	4	3	3	Yes	The examiner could not hear me during one OSCE case...Audio failure which IT fixed	More dynamic imaging provided (CT) instead of single images	Two day examination. More comprehensive testing of knowledge.	Time at a few stations was short and as such responding under pressure comprised knowledge communicated.	This model is definitely a workable model with some modifications. Thank you for the opportunity to partake in the exams and study.
2020-08-26 16:11:20	Yes	FC Urol(SA) Final	Durban	5	5	Appropriate	Appropriate	5	5	3	No		5	4	3	5	No	4	4	5	5	5	4	No		make it virtual reality poosibly	more relaxed atmosphere	none	nil
2020-08-27 12:17:43	Yes	FCMG(SA) Part II	Cape Town	3	4	Appropriate	Appropriate	4	4	4	No		4	4	4	4	No	4	4	5	5	5	4	No		was well run	very well organised	was stressful	no
2020-08-27 12:26:21	Yes	FCMG(SA) Part II	Cape Town	4	4	Appropriate	Appropriate	4	2	1	No		4	4	1	5	Yes	5	4	5	5	5	5	No		n/a	It was a positive experience	n/a	n/a
2020-08-27 12:26:47	Yes	FCMG(SA) Part II	Cape Town	3	4	Appropriate	Appropriate	3	4	2	No	some examinors were a bit uncertain reagridng the slide sequence and where questions go in relation to the slides. Sometimes a bit uncertain where what information is wanted.	4	4	5	4	No	4	3	5	5	4	4	No		n/a	n/a	n/a	n/a
2020-08-27 20:35:10	Yes	FC Path(SA) Chem Part II	Cape Town	5	3	Too short	Too short	2	3	3	Yes	Data was copied from a table in MS Word to a spreadsheet in MS Excel. The data was formatted at text instead of numbers so I wasn't able to do calculations. I managed to solve the problem after a few minutes and was allowed extra time but, for this particular paper, there was actually plenty of time, so I didn't need to use it.	4	5	1	5	Yes	5	5	5	5	5	5	No		I wasn't actually told I had to have the examiners' video visible, so I switched it off and found this a much more pleasant experience than what I had been expecting based on colleagues' related experiences of previous examinations.	Really enjoyed that we avoided the Spanish Inquisition in the oral.	None. I think it went well.	There isn't an appropriate place for this info, as it is regarding the computer-based written exams. FC Path (SA) Chem exams are quite different than the clinical specialties. Written exams (clinical cases, OSPE, calculations) POSITIVES It was good that there were two screens. It was also good that we were allowed to answer our written papers in books as we had to do calculations and write out fo…
2020-08-27 23:32:41	Yes	FCNP(SA) Part II	Durban	5	5	Appropriate	Appropriate	5	5	1	No		4	5	4	1	Yes	5	4	5	5	5	5	No		There should be provision to clarify answers from previous sessions because exam anxiety results in forgetting what you know only to realise when you are doing another case.	Having many cases allows for recovery even shen 1 doesn't go well and it's a better way of showcasing knowledge.	Not being able to comment on previous sessions because each session had different examiners.	This is a brilliant setup.
2020-08-28 14:15:25	Yes	FCPHM(SA)	Bloemfontein	4	4	Too short	Much too short	4	5	2	No		4	5	2	4	No	5	5	5	5	4	5	No		Clear instruction before the exams; Bigger screen and adequate ventilated facilities	It was a real unnerving experience but the friendly examiners made it easy.The assistance of ICT closeby and friendly examiner helped ease the anxiety	The stations were really very short especially because I did not what to expect. The gesture of some examiners were a real distraction	Clear instructions before exams, if possible a dry run
2020-08-31 10:36:04	Yes	FC Neurol(SA) Part II	Johannesburg	4	4	Appropriate	Appropriate	2	3	1	Yes	Videos were playing in slow motion	4	5	1	5	No	5	2	5	5	5	5	No		Have clearer videos	Examiners were very fair	none	no
2020-08-31 10:45:49	Yes	FC Neurol(SA) Part II	Cape Town	3	3	Appropriate	Too short	2	4	4	Yes	The Cape Town Examiners kept breaking up - freezing the screen - very difficult to see videos as well - especially my first case	3	4	4	3	No	2	2	5	5	4	2	Yes	Cape Town Examiners kept breaking up	They could maybe have had videos on the computers for the participant to play and avoid poor quality and lagging	I am grateful for the chance to have had an examination at all	It was difficult to be rushed for time and not have a patient where I could elicit signs and think about it to have an appropriate differential diagnosis. The cases were also not all quite clinical - for example one would not expect to have a headache patient in the exam.	It think this was well organized on short-notice. The only way to perfect this is by trial and error - see my previous comment on the videos.
2020-08-31 12:21:36	Yes	FC Neurol(SA) Part II	Johannesburg	4	4	Appropriate	Appropriate	5	3	3	No		5	5	1	5	No	5	5	4	4	5	4	No		nil	range of cases	-	-
2020-09-02 08:35:36	Yes	FC Ophth(SA) Final	Cape Town	5	5	Appropriate	Appropriate	4	5	1	No		4	5	1	5	No	5	5	5	5	5	5	Yes	for about 30 seconds there was a bit of an audio problem but it resolved itself.	Possibly include special investigations like OCT/Pentacam/	The fact that all candidates are on the same footing. The home cadites have a clear advantage when it comes to clinical osce with patients. Those travelling to other provinces do so at great cost and emotional stress. The examination as it was done now should be the way forward.	None	For a first run this was an excellent experience.
2020-09-02 09:04:33	Yes	FC Ophth(SA) Final	Cape Town	5	4	Appropriate	Appropriate	4	4	1	No		5	5	4	4	No	4	1	5	5	5	5	Yes	Just for few seconds, the video jammed and had to ask the examiner to repeat the question	This was perfect and less intimidating. Please keep it this way	Examiners were friendly and asked fair questions	Nothing much except for the minor screen freeze	No
2020-09-02 12:35:09	Yes	FC Ophth(SA) Final	Bloemfontein	5	5	Appropriate	Appropriate	5	5	3	No		4	5	1	5	No	5	5	5	5	5	5	No		NOTHING	NO TRAVEL	WAITING TIMES AFTER THE EXAM	NO
2020-09-02 12:38:23	Yes	FC Ophth(SA) Final	Bloemfontein	5	5	Appropriate	Appropriate	5	5	3	No		5	5	2	5	No	5	4	5	5	5	5	No		none	the organization was good	none	no
2020-09-02 13:44:58	Yes	FC Ophth(SA) Final	Durban	5	5	Appropriate	Appropriate	5	4	4	No		5	5	1	5	No	5	4	3	3	5	2	No		Larger screen	Friendliness of examiners	small screen to look down to	camera and laptop should be bigger and elevated
2020-09-02 14:15:40	Yes	FC Ophth(SA) Final	Durban	4	4	Appropriate	Appropriate	4	5	3	No		4	5	1	5	No	5	3	5	5	5	5	No		I was happy	the exam was fair	i was nervous	I was happy. i think it saves a lot of time having it on zoom. Its more efficient.
2020-09-02 15:00:01	Yes	FC Ophth(SA) Final	Durban	3	4	Appropriate	Appropriate	4	4	2	No		4	4	1	4	No	4	4	5	5	5	5	Yes	Electricity loadshedding ocurred with the generator being switched on at the venue. The volume of the speaker was low and the invigilator increased the volume.	Ensure that photos are a clear depiction of the pathology	The ability to have the examination in your home city and not having to travel and seek accomodation in a foreign place especially during a pandemic. This resulted in less stress, in an already stressful period, and a cost saving.	nil	The two screens worked well in answering questions in the OSCE.
2020-09-02 15:55:45	Yes	FC Ophth(SA) Final	Johannesburg	5	5	Appropriate	Appropriate	4	5	3	No		4	4	3	3	Yes	3	3	5	5	4	4	No		faster internet connection	typing answers, online format	none	nil
2020-09-02 16:21:29	Yes	FC Ophth(SA) Final	Johannesburg	4	5	Appropriate	Appropriate	4	4	2	Yes	Sound cut in and out	4	4	3	4	No	2	3	1	1	3	3	Yes	sound cut in and out	better sound	invigilators were nice	sound	no
2020-09-02 16:58:34	Yes	FC Ophth(SA) Final	Johannesburg	3	4	Too long	Appropriate	4	4	5	No		4	5	2	5	No	5	5	3	4	4	3	No		very poor lighting in the cmsa office where the call was conducted	being able to drive in from home	long waiting time to do the oral and also now anticipated long waiting times for results	none
2020-09-02 17:26:36	Yes	FC Ophth(SA) Final	Johannesburg	3	3	Too long	Too short	3	3	2	No		4	5	2	5	Yes	5	5	5	5	5	5	No		NONE	Pleasant	Anxiety	NONE
2020-09-02 18:01:27	Yes	FC Ophth(SA) Final	Johannesburg	4	4	Appropriate	Appropriate	4	4	3	No		4	4	2	4	Yes	4	3	5	5	5	4	No		allow use of headphones with speakers for candidates	well organised	very long day to accomodate all candidates	none
2020-09-07 13:28:52	Yes	Cert Rheumatology(SA) Phys	Cape Town	5	5	Appropriate	Too short	5	5	3	No		5	5	2	4	No	5	4	4	4	5	5	No		just be sure of the time to be ppropriate to the candidates	less stress and able to be asked by many questions and many cases fro examination	first experience no previous information	No
2020-09-07 13:34:26	Yes	FC Path(SA) Micro Part II	Johannesburg	4	4	Too short	Too short	3	4	1	No		4	4	2	4	No	4	4	4	4	3	4	No		By allocating more time to zoom oral exam	answering osce/spots on a computer, the time allocated for the number of questions was too much though	The cases where too many and the time allocated for day 1 was too short	no
2020-09-08 10:13:23	Yes	FC Plast Surg(SA) Final	Cape Town	4	5	Appropriate	Too short	4	4	5	No		4	4	4	4	No	4	4	5	4	4	4	Yes	Loss of voice for 10 seconds from one of the examiners	None	Great examiners, well organized, great quality zoom	Not being able to examine the patient	Great job done in these difficult times!
2020-09-08 10:22:42	Yes	FC Plast Surg(SA) Final	Cape Town	5	5	Appropriate	Appropriate	5	5	3	No		5	5	1	5	No	5	5	5	5	5	5	No		landscape orientation of some of the picture drawings	warm and professional examiners and fair air to the examination process	one of the label diagrams was in landscape when I think potrait would have allowed for more space for labelling	no
2020-09-08 10:26:15	Yes	FC Plast Surg(SA) Final	Cape Town	5	5	Appropriate	Appropriate	4	5	2	Yes	Loss of signal. Had to change computers mid exam	5	5	2	5	No	4	4	5	5	5	5	Yes	Loss of computer signal. I was moved to another room/computer	Obviously a few hiccups with the first attempt that can me improved in subsequent exams	The decreased personal financial cost. L	The fact that the oral exam date was postponed significantly	Maybe do a test run with the examiners and the ground staff at the college before to allow it run a bit smoother. But all in all very well done.
2020-09-08 12:29:28	Yes	FC Plast Surg(SA) Final	Cape Town	4	4	Appropriate	Appropriate	4	4	2	No		3	5	3	4	Yes	4	4	4	4	4	5	No		nothing to suggest	most examiners were clear	some examiners were unclear with their line of questioning	none
2020-09-09 10:13:13	Yes	FC Plast Surg(SA) Final	Cape Town	4	4	Appropriate	Appropriate	4	5	5	No		4	4	3	5	No	5	4	4	4	4	4	No		None	Great examiners, great cases, flawless experience	None	Excellent
2020-09-09 10:16:27	Yes	FC Plast Surg(SA) Final	Cape Town	5	5	Appropriate	Appropriate	5	5	2	No		4	5	5	5	No	5	4	5	5	5	5	No		today very good	cost saving	none	none
2020-09-09 10:22:30	Yes	FC Plast Surg(SA) Final	Cape Town	5	5	Appropriate	Appropriate	5	5	1	No		5	5	1	5	No	4	5	5	5	5	5	Yes	loss of voice from examiners occurred a number of times, video of examiners was static with one set of examiners	Nil	good and clear communication	being unaware of how many questions were structured for the individual stations can be unnerving as one does not know if they have managed to answer the required questions or if there are some that were not asked	nil
2020-09-09 12:28:08	Yes	FC Plast Surg(SA) Final	Cape Town	3	4	Appropriate	Appropriate	3	3	3	No		3	4	4	4	Yes	4	3	3	4	4	4	No		N/A	N/A	N/A	N/A
2020-09-09 12:33:58	Yes	FC Plast Surg(SA) Final	Johannesburg	5	3	Appropriate	Much too long	3	3	1	Yes	sound	3	4	1	4	No	4	4	5	5	5	5	No		better sound quality	very well organised	nil	nil
2020-09-09 12:34:14	Yes	FC Plast Surg(SA) Final	Durban	3	3	Appropriate	Appropriate	3	4	3	No		3	4	4	5	No	3	3	5	5	4	4	No		Better quality images	less pressure from lack of face to face contact	stress	no
2020-09-09 14:58:06	Yes	FC Plast Surg(SA) Final	Johannesburg	4	3	Appropriate	Appropriate	4	3	4	No		3	4	2	4	No	5	5	5	5	4	4	No		n/a	n/a	n/a	no
2020-09-10 14:46:07	Yes	FC Cardio(SA) Final	Cape Town	3	4	Much too long	Too short	1	3	1	Yes	Could not display the cursor on the screen, could not had over the mouse even though all steps were followed. Angiograms should be candidate operated so we can regulate the speed.	3	5	5	4	No	5	2	5	5	5	5	Yes	Displaying images and running angiograms	I think it would be better if the images and media is loaded up on a server at the CSMA and have it controlled from this side by the local examiner himself, so that it is more controlled and regulated.	It was good to have short scenarios to show scope of practice. And the fact that the time schedule, though to long was stuck to was good.	The long waiting periods between sessions, would advice each candidate having the full session while the others wait, if imaging could be better organised it would run faster more smoothly and far less time	All mentioned above. Please try to have the media not be run from remote sites. It already is a very stressful situation to attend an oral examination and if you struggling to see imaging it totally throws one off balance.
2020-09-10 15:48:13	Yes	FC Cardio(SA) Final	Johannesburg	4	4	Appropriate	Appropriate	4	4	4	Yes	microphone went off	4	4	4	4	No	4	4	4	4	4	4	Yes	microphone went off	reduce duration of exam time	fair organised	some images were mot too clear	yes
2020-09-11 10:19:14	Yes	Dip Allerg(SA)	Cape Town	3	2	Appropriate	Appropriate	4	3	4	No		3	4	4	4	Yes	4	4	5	4	3	2	No		I so appreciate the opportunity to complete this diploma exam given the current COVID climate. Although a clinical case would be best - this is definitely a close second. No technical issues were experienced during the exam	Close to home - huge cost savings for me!	Loss of face to face interaction makes it difficult to interoperate the examiners.	Worked well!
2020-09-11 10:37:35	Yes	Dip Allerg(SA)	Johannesburg	4	3	Appropriate	Appropriate	3	2	3	No		3	3	4	5	No	5	4	5	5	3	3	No		I would recommend a mock exams as I was initially under the impression we may interview an examiner for history.	It was convenient.	Nil	no
2020-09-11 12:03:28	Yes	Dip Allerg(SA)	Cape Town	4	4	Appropriate	Appropriate	4	5	2	No		4	4	2	5	No	5	5	5	5	4	4	No		Being the first time for me, I'd say it went well.	There was no tension of examiners physically in front of you	The waiting period between candidates	No
2020-09-11 13:54:02	Yes	Dip Allerg(SA)	Johannesburg	4	4	Appropriate	Appropriate	4	4	4	No		4	4	3	4	Yes	4	4	4	4	4	3	No		Not sure	Waiting time	No actual patient	none
2020-09-14 11:50:09	Yes	Dip Allerg(SA)	Johannesburg	2	2	Too short	Too short	2	3	4	Yes	Sound occasionally didn't work mid-sentence for a second or so	2	2	4	4	Yes	3	3	2	2	2	2	No		Previous examination formats, and what happens in 'real-life' patient-doctor consultations outside of examinations in order to come to a conclusion (having that time alone with a patient, to talk and process ones thoughts/information) I feel is a far better clinical representation of ones ability than a a very high pressured, time-limited and case-limited examination via zoom. I feel it would be …	The CMSA assistants on the day were lovely. They were helpful, friendly and eager to help calm the nerves where they could.	Not having time to think through the case without the pressure of the examiners looking at you and waiting for an answer. ***Please see detailed explanation above.*** Also, having to wait for over 4hrs on one chair placed in the middle of an entry way/room could possibly be better accommodated.	I also feel it's important to be assessed while training for the exams, in the hospital/clinics with ones supervisor, which is a non-pressured more natural environment with 'real-life' cases and interactions with patients being assessed. A once off high-pressured examination via zoom, versus a daily/weekly observation of ones ability, ones growth in their knowledge and ability as well as ones eag…
2020-09-14 14:04:47	Yes	FC Neurol(SA) Part II	Cape Town	4	4	Too short	Too short	4	5	3	Yes	Videos slow	4	4	2	4	No	4	4	5	5	4	4	No		More time for discussion. Preloaded videos	Kind examiners. Felt comfortable presenting virtually	Slow videos	No
2020-09-14 14:37:53	Yes	FCORL(SA) Final	Johannesburg	5	5	Appropriate	Appropriate	5	5	3	No		4	5	3	5	No	5	5	5	5	5	4	No		Nil	The examiners were very pleasant	Long wait for results	Nil
2020-09-15 08:56:32	Yes	FCP(SA) Part II	Cape Town	4	4	Appropriate	Appropriate	4	4	4	No		4	4	4	4	No	4	4	4	4	4	4	No		Exam is well run. No suggestions	Professional environment. Relaxed.	None	No
2020-09-15 11:32:35	Yes	FCP(SA) Part II	Cape Town	4	4	Appropriate	Appropriate	4	4	4	No		4	4	4	4	No	4	4	4	4	3	3	No		None	professional and relaxed atmosphere	It takes too long	No
2020-09-15 11:32:42	Yes	FCP(SA) Part II	Durban	4	2	Appropriate	Appropriate	4	4	3	No		5	3	4	5	Yes	5	4	5	5	5	5	No		increase number of cases	less stressful	the tine to run through cases is short especially when there is more than two cases per session	no
2020-09-15 11:33:08	Yes	FCP(SA) Part II	Johannesburg	3	3	Appropriate	Appropriate	5	4	5	Yes	in the first exam my examiner was logged out	4	4	1	1	No	5	5	4	4	4	3	Yes	First examiner got logged out during my exam	More time for the candidate to read the question	The exam moved quickly	not enough time to read the question	increase the time for prep to 7 minutes
2020-09-15 11:34:58	Yes	FCP(SA) Part II	Cape Town	4	4	Appropriate	Appropriate	4	5	3	No		5	5	3	5	No	5	5	5	5	5	5	No		i think it was prefect how was it done	having the exam locally	being new format otherwise nothing to mention	no
2020-09-15 12:09:12	Yes	FCP(SA) Part II	Cape Town	3	3	Appropriate	Too long	4	4	5	Yes	One occasion of slides not moving but was quickly resolved and not a big issue	4	2	1	3	No	5	2	3	5	3	1	No		Images should be larger - ecg's especially	Given the complexities of this exam I found it a pleasant experience.	The delay in getting finally of the formal and the date. The length in terms of time from written to clinical to orals - its a long time to have an exam hanging over your head.	-
2020-09-15 12:11:41	Yes	FCP(SA) Part II	Durban	4	4	Too short	Too short	4	4	3	No		3	3	3	3	No	3	3	3	3	3	3	No		it was run well	it was run well	long exam process	no
2020-09-15 12:11:51	Yes	FCP(SA) Part II	Johannesburg	4	4	Appropriate	Appropriate	4	5	2	No		5	5	1	5	No	5	3	5	5	5	5	No	.	.	.	.	.
2020-09-15 12:15:17	Yes	FCP(SA) Part II	Johannesburg	4	4	Appropriate	Appropriate	4	4	5	Yes	For the case of SACD, we should have been prompted specifically that it was a neuro case. It was my first case and at that point I wasnt sure wwhether this was diabetes case, haematology case or neurology.	4	4	3	4	No	5	5	4	4	3	3	No		More prompting from the examiners in case you are going in a wrong tangent.	More cases to show broad knowledge	Finding out in the middle of my case what specialty I was being examined on	No
2020-09-15 12:15:34	Yes	FCP(SA) Part II	Johannesburg	3	4	Appropriate	Appropriate	4	3	4	No		4	4	3	4	No	5	4	4	4	4	4	No		give the questions before hand with the reading material	first group to ever have done this exam	Examiners should be allowed to direct or redirect or ask questions as well.	none
2020-09-15 12:28:36	Yes	FCP(SA) Part II	Durban	5	5	Appropriate	Appropriate	5	4	1	No		5	5	1	5	No	5	2	5	5	4	4	No		it was good, I cannot complain	The fact that the examiner is not with me in the room made me comfortable. The questions were appropriate for us and were the usual cases we see in the wards. So it was fair.	The fact that we had more examinations than usual, I was very exhausted. But otherwise the examination itself was fair. In some of the cases I did not know if I have said enough, or too much, or if they expected me to say anything more.	Exam was fair in terms of the cases. But if they would prob the candidate especially if they are going the wrong direction. The candidate never knows if what they have said is enough and sometimes it is difficult to know what is being asked exactly.
2020-09-15 12:30:39	Yes	FCP(SA) Part II	Johannesburg	5	5	Appropriate	Appropriate	4	5	2	No		4	5	2	5	Yes	5	3	5	5	5	5	No		for a first time it was so well done	the exam was done very well	the images like chest xray were not clear	provide images like ecg and xray
2020-09-15 12:49:22	Yes	FCP(SA) Part II	Johannesburg	5	5	Appropriate	Appropriate	4	1	3	No		4	5	3	4	Yes	4	5	4	4	4	4	No		nil	kindness	stress	no
2020-09-15 15:47:27	Yes	FCP(SA) Part II	Durban	4	4	Appropriate	Appropriate	4	4	4	No		5	4	2	4	No	4	4	3	3	4	2	No		More interaction between candidate and examiner	Very smooth process, lovely ushers, kept to time	n/a	Well structured and organised exam. Given the new format there was Reduced stress having it run so smoothly.
2020-09-15 15:51:39	Yes	FCP(SA) Part II	Johannesburg	2	4	Appropriate	Appropriate	5	5	3	Yes	Second examiner was unable to join call. Significant delay in finding second examiner.	3	4	2	5	Yes	5	2	4	4	2	4	Yes	Second examiner eventually joined. Time was extended	No suggestion	Real time marking	Time in between each station	The fact that the examiners could ask no questions and therefore there was no real interaction or discussion suggests this exam could more easily have been conducted as a written paper. Doing it via Zoom seemed completely unnecessary.
2020-09-15 15:52:20	Yes	FCP(SA) Part II	Durban	3	5	Appropriate	Appropriate	5	2	5	No		3	5	4	1	No	5	5	4	4	2	3	No		Currently it is working well, having an examiner at place would help	It was well done	Having no real patient to discuss around	no
2020-09-15 15:57:29	Yes	FCP(SA) Part II	Johannesburg	4	4	Too long	Appropriate	5	3	4	No		4	5	2	5	No	5	5	3	3	3	2	No		If more examiners simulataneously examine, less waiting time between cases	.	Delay with announcing schedule for examinations & candidates allocations	no
2020-09-15 16:32:21	Yes	FCP(SA) Part II	Johannesburg	4	4	Appropriate	Appropriate	4	4	2	No		4	4	3	4	No	5	5	4	4	4	3	No		Ensure no technical hitches	Ability to discuss around more cases	Not being able to narrow down on specific answers sometimes due to minimal information	No
2020-09-15 16:34:17	Yes	FCP(SA) Part II	Johannesburg	4	5	Too long	Too short	5	4	3	No		4	3	3	2	No	5	5	5	5	2	3	No		reduce time spent between cases	lovely staff at cmsa	waiting betwwen cases	no
2020-09-15 16:35:08	Yes	FCP(SA) Part II	Johannesburg	4	4	Appropriate	Appropriate	4	4	2	No		4	4	2	4	Yes	5	4	4	4	4	4	No		Shorten the waiting time between cases	Johannesburg Office staff was very accommodating	Long waiting time between cases	Shorten the waiting time between cases
2020-09-15 16:38:42	Yes	FCP(SA) Part II	Cape Town	5	5	Appropriate	Appropriate	4	4	3	Yes	The call was dropped on 2 occasions unclear why as the power was on.	4	4	2	1	No	4	2	4	4	3	3	Yes	Call was dropped twice but came back again without any intervention	don't know	well despite it being the exam i learn from seeing different cases.	we had to wait a long time before we knew the exam dates and venues. sometimes it was unclear as to how we were going to be examined.	it can be a way of assessing candidates in future provided minimal technical glitches.
2020-09-15 16:41:51	Yes	FCP(SA) Part II	Durban	5	5	Appropriate	Appropriate	5	5	4	No		4	4	2	4	Yes	5	5	5	4	4	3	No		The exam was well prepared and good	This exam showed that we can conduct future exams in this way; locally and nationally	None regarding the exam. The waiting area at the venue needs to be improved.	No
2020-09-15 16:48:12	Yes	FCP(SA) Part II	Cape Town	4	4	Appropriate	Appropriate	5	5	1	Yes	No 5 minute warning was given, and the examiners were controlling the time so could not finish last part question	5	5	1	1	Yes	5	5	5	5	5	5	No	N/A	all was good	Friendly environment and invigillators	questions with long stems chew our time eg in thyroid each subsection had a story	nil
2020-09-16 11:27:44	Yes	FCP(SA) Part II	Cape Town	4	4	Appropriate	Appropriate	3	3	4	No		4	4	3	5	No	5	5	5	5	5	5	No		There needs to be more interactions during the question between the examiner and candidate . I felt like I was talking to myself , with no indication of whether I was doing well, no guidance in the cases which I was doing badly	It was a very well run exam , with no technical problems	none	none
2020-09-16 11:28:45	Yes	FCP(SA) Part II	Johannesburg	5	5	Appropriate	Appropriate	5	5	3	No		4	5	5	5	Yes	5	1	5	5	5	5	No		ok	fair	none	fair
2020-09-16 11:29:09	Yes	FCP(SA) Part II	Cape Town	2	3	Appropriate	Appropriate	2	4	5	No		2	3	5	2	Yes	5	2	1	1	4	3	No		I think that the cases can be unrealistic in the order in which information is presented - In my case today I had a CT before having basic blood results, If I had seen the results first I would have been able to demonstrate to the examiners how I would now view the case. In the reality of practice one is constantly evolving ones diagnosis - including and excluding differentials as the information…	I could park inside the college, that was nice	The inability to talk freely throughout the case - I would prefer to speak (uninterrupted) for 5 minutes to bring together all aspects of the case so the examiners can see the insight. I do not think it is fair to answer one aspect of care in isolation especially when it impacts other aspects of patient care. (The case I refer to is the 67 year old DM with a recent DES for NSTEMI). I was asked ju…	I support the idea for a final exam being conducted as a post intake ward round. Examiners can join candidates after an intake (even on Zoom), to get a better impression of a candidates ability, reasoning and judgment as well as time management and their ability to triage and prioritize patients that come into our care overnight
2020-09-16 11:29:37	Yes	FCP(SA) Part II	Durban	4	3	Appropriate	Too short	3	5	3	No		4	4	3	4	Yes	4	4	4	4	4	4	No		increase number of cases	1st time with zoom model exam.	there is long case with multiple pages and no one instructed to read the whole pages or at lest written on the front page to go through the whole pages	no
2020-09-16 11:35:22	Yes	FCP(SA) Part II	Johannesburg	5	5	Appropriate	Too short	4	3	4	No		3	3	4	3	Yes	4	4	3	3	3	3	No		give time between cases	punctuality	time management, 2 cases in10 min was too little	no
2020-09-16 11:35:46	Yes	FCP(SA) Part II	Johannesburg	5	5	Appropriate	Appropriate	5	5	1	No		5	5	1	5	No	5	5	5	5	5	5	No		improve the sounding system	it was less stressful than one would have expected	nothing at this stage	probably to run it on 2 days
2020-09-16 11:38:21	Yes	FCP(SA) Part II	Bloemfontein	3	4	Appropriate	Appropriate	2	2	1	Yes	I got the one page for the instead of 3 pages (investigations)	3	3	4	5	Yes	5	5	5	5	5	5	No		Give us the questions before hand. We were not if we were allowed to change our answer once the case continued	Nothing positive. Fatigue from all the COVID patients we treat and yet be expected to do so many examinations. It is very exhausting.	Too much stress. Prolonged examination preparations.	It is a good exam. We are not sure how it differs from the objective assessment.
2020-09-16 11:55:10	Yes	FCA(SA) Part II	Umtata	4	4	Appropriate	Too short	3	3	2	No		3	3	4	4	Yes	3	3	4	4	3	3	No		all was ok	cost saving	none	it was ok
2020-09-16 12:00:28	Yes	FCP(SA) Part II	Johannesburg	4	3	Appropriate	Appropriate	5	4	3	No		5	4	3	5	No	5	5	5	5	4	3	No		timing	short questions and precise	cant think of any	it was new experience
2020-09-16 12:02:11	Yes	FCP(SA) Part II	Cape Town	4	4	Appropriate	Appropriate	2	4	3	No		4	2	5	4	No	4	2	5	5	4	4	No		The ecg on one of the cases was of poor quality and it was difficult to see	Quick and fair, much less expensive	I have no real negative remarks	none
2020-09-16 12:05:45	Yes	FCP(SA) Part II	Durban	3	3	Appropriate	Appropriate	2	1	5	No		2	3	4	3	Yes	4	3	2	2	3	3	No		Examiners can ask questions cause some questions were not clear.	None	waiting in-between cases was too long	N/A
2020-09-16 12:05:55	Yes	FCP(SA) Part II	Cape Town	4	5	Appropriate	Appropriate	4	5	3	Yes	During my first case the sound was interrupted but fortunately it did not cause a major disruption	4	5	3	4	No	5	5	5	5	5	5	Yes	as mentioned before	I felt the exam was well executed	All the candidates recieved the same questions therefore not examiner bias. The examiners did not interupt.	none experienced	no
2020-09-16 12:07:23	Yes	FCP(SA) Part II	Johannesburg	3	3	Appropriate	Appropriate	4	4	4	No		4	3	3	3	Yes	3	3	3	3	3	3	No		good overall	efficient staff	waiting times	no
2020-09-16 12:08:26	Yes	FCP(SA) Part II	Johannesburg	4	3	Too long	Appropriate	3	4	1	Yes	freezing	3	4	1	4	No	3	3	5	5	5	5	No		more time to read scenario	being at home	freezing screen	no
2020-09-16 12:13:57	Yes	FCP(SA) Part II	Durban	4	5	Too long	Appropriate	5	4	5	No		3	4	3	5	No	5	5	4	3	4	3	No		time between cases was too long. not allowing examiners to add on or probe made it more difficult, minimal discussion would have helped	the exam was well organised	examination took very long.	no
2020-09-16 12:16:27	Yes	FCP(SA) Part II	Bloemfontein	5	5	Appropriate	Appropriate	3	5	2	No		5	5	3	5	No	5	5	5	5	5	5	No		its adequate nothing to improve	I didn't examiners in the same room with me and it helped to ease the anxiety	Did not see the need for this exam after we had written and 3 short cases. Any candidate that fail the Zoom exam will be severely affected mentally.	CMSA should decide on Zoom or short oral cases not both after candidates have passed the written component
2020-09-16 15:50:16	Yes	FCP(SA) Part II	Cape Town	3	4	Appropriate	Appropriate	3	5	2	No		4	5	1	5	Yes	5	4	5	5	5	5	No		less time between stations	not having to look my examiner in the eye	none	none
2020-09-16 15:50:52	Yes	FCP(SA) Part II	Cape Town	5	5	Appropriate	Appropriate	4	5	1	No		4	5	2	5	Yes	5	5	5	5	5	5	No		More time for the case prep	Not being in front of examiners	Duration of waiting	This exam is more objective than the previous style of exams
2020-09-16 15:55:20	Yes	FCP(SA) Part II	Cape Town	5	5	Appropriate	Appropriate	5	3	1	No		5	5	3	3	Yes	4	5	5	5	5	5	No		I think it was great, the only issue was with the last case with the one examiners line not being very clear	great exam	none	I believe the setup to be fair, well run. the time between cases felt a bit long. i had 30 mins plus between
2020-09-16 16:33:25	Yes	FCP(SA) Part II	Cape Town	5	5	Appropriate	Appropriate	5	5	3	No		5	5	1	5	No	5	5	5	5	5	4	No		Increase stem preparation time(20min)	fair exam; well organized and fair examiner	Nil	Yes
2020-09-16 16:35:47	Yes	FCP(SA) Part II	Cape Town	2	3	Too long	Appropriate	3	3	3	No		3	4	2	2	No	5	2	5	4	3	3	No		Longer preparation time for the cases. Providing more mock cases to show the variability in the questions	The invigilators were lovely and supportive, IT on site	Initially very poor communication from the CMSA: waiting months for results, lack of clarity regarding the exam format and initially poor communication (this did improve towards the exam), delayed release of the programme for the exam so that I was unable to plan when to put in leave for the exam or arrange my on-call day/night so as not to be post call on the exam day	Nil. Worked well
2020-09-16 16:38:12	Yes	FCP(SA) Part II	Cape Town	4	5	Too short	Appropriate	5	5	1	No		3	4	4	4	No	5	3	5	4	5	5	No		clear information in side exam about time	near home	time sometimes i rush to second question	no thanks
2020-09-17 11:22:46	Yes	FCP(SA) Part II	Johannesburg	4	5	Much too long	Appropriate	5	4	5	No		4	3	4	2	Yes	5	5	3	1	1	1	No		decrease time between cases	real time assessment	there was no conversation with the examiners. this therefore was a regurgitation of the written exam. A conversation with the examiners would help in assessing the thought process of the candidate.	no
2020-09-17 11:23:48	Yes	FCP(SA) Part II	Cape Town	3	3	Appropriate	Appropriate	4	5	3	No		4	5	3	2	No	5	3	3	3	3	2	No		video was not always switched on, making it difficult to discuss findings to a screen. Oral examinations to be done closer to after written and theory knowledge is optimal around that time.	sufficient time allocated to go through cases and then answer	none	well conducted generally. perhaps timing of the exam moved closer to after the written component.
2020-09-17 11:24:35	Yes	FCP(SA) Part II	Cape Town	4	4	Appropriate	Appropriate	4	5	2	No		5	5	1	4	No	5	4	5	5	5	5	No		The time between stations was too long. 15 minutes break is more than enough between each station.	Very well planned and efficient.	None.	None
2020-09-17 11:26:09	Yes	FCP(SA) Part II	Johannesburg	5	5	Appropriate	Appropriate	5	5	5	No		5	5	5	5	No	5	5	5	5	5	5	No		everything was conducted well	it was interesting to have the exam this way	none	no
2020-09-17 11:26:28	Yes	FCP(SA) Part II	Johannesburg	4	3	Appropriate	Appropriate	3	3	5	No		4	4	5	4	No	4	4	2	2	2	1	No		Allowing for more of a discussion with examiners around topics	Centre was well run. Was organized.	I found the exam very rigid. It did not allow for clarification around aspects of questions and did not allow for discussions around topics with the examiners which I feel is a better means of assessing a candidates competency.	No
2020-09-17 11:26:51	Yes	FCP(SA) Part II	Bloemfontein	1	2	Appropriate	Appropriate	3	3	5	Yes	examiner struggled to log in	1	1	5	1	Yes	2	5	1	1	1	1	Yes	examiners struggled to log in	more interactive	nil	inpersonal	more interaction from examiners
2020-09-17 11:37:13	Yes	FCP(SA) Part II	East London	5	5	Appropriate	Appropriate	5	4	2	No		5	5	1	5	Yes	5	5	5	5	5	5	No		started on a good note ,	it minimise the fear and pressure of exams	nil	no
2020-09-17 12:01:58	Yes	FCP(SA) Part II	Johannesburg	5	5	Appropriate	Appropriate	5	4	4	No		4	4	5	5	No	5	5	3	3	4	3	No		less time between cases	fair questions, examiners pleasant	not have a question-discussion from the examiners	no
2020-09-17 12:03:12	Yes	FCP(SA) Part II	Johannesburg	4	5	Appropriate	Appropriate	5	4	3	No		5	5	3	4	No	4	1	4	4	5	2	No		give more training and mock questions with possible mock videos	very organised, low stress	there is no feedback from examiners, no prompting etc. we might as well have had a written exam	allow the examiners to discuss with you and have a productive interaction
2020-09-17 12:06:31	Yes	FCP(SA) Part II	Bloemfontein	3	5	Appropriate	Appropriate	4	4	4	No		4	3	5	4	No	4	4	4	4	4	3	No		Give the questions as well during the preparation time	Locality, no travelling.	Examiners only asked if the case was seen before, it should rather be read to us by the examiners or vice versa at the exam sitting.	case must be read during the exam session as well during the preparation
2020-09-17 12:12:10	Yes	FCP(SA) Part II	Cape Town	1	1	Appropriate	Too short	1	3	3	No		2	4	2	5	Yes	5	5	5	5	5	3	No		nil	The friendly CMSA staff	Some of the questions were too obscure, and not specific enough. When questions are not clear, one tends to ramble. The examiners cannot offer further clarification on these questions when asked	Questions must be more clear and specific about what information is needed from the candidate
2020-09-17 12:13:26	Yes	FCP(SA) Part II	Cape Town	4	5	Appropriate	Appropriate	5	5	3	No		4	4	1	4	Yes	5	5	5	4	4	4	No		So far so good	scope of exam was wide	forgot to say simple stuff that i could have easily talked about	Looks good
2020-09-17 12:16:51	Yes	FCP(SA) Part II	Polokwane	5	4	Appropriate	Appropriate	4	5	4	No		4	5	2	5	No	5	5	5	5	5	3	No		By conducting Mock exams to help candidates to become familiar with technology	Embracing technology and going ahead with Exam during Covid times	The breaks in between cases were long	no
2020-09-17 16:21:48	Yes	FCP(SA) Part II	Durban	5	4	Appropriate	Appropriate	4	4	3	No		3	4	2	4	Yes	5	3	5	5	5	5	Yes	Laptop battery died. Easily managed by obtaining charger.	Allow you to have blank paper with you during the question session to better structure your thoughts	No travel. No need to adjust to unknown environment and clinical setting. Costs saved.	I didn't realise the initial case scenarios would be taking away from me. I thought I would have them available throughout.	Outcomes should be set per year of study and exams set over a longer period of time, for example yearly. This will allow for struggling candidates to be identified earlier
2020-09-30 06:15:28	Yes	FC Derm(SA) Part II	Cape Town	4	5	Appropriate	Too short	3	5	3	No		5	4	2	4	No	4	4	5	5	5	5	No		The quality of our histology slides were inadequate. The cmsa should moderate this	The cmsa staff were helpful and professional	The quality ofthe histology slides were inadequate. The medicine long case had 22 slides to read through in 20 min. This should have been moderated by the cmsa	Cmsa Cape Town branch was exceptional in their support on the day!
2020-09-30 10:10:23	Yes	FC For Path(SA) Part II	Durban	5	5	Appropriate	Appropriate	5	5	1	No		5	5	1	5	No	5	5	5	5	5	5	No		N/A	Finally getting the opportunity to finish what I started, and potentially realise a dream come true	None	No
2020-09-30 10:15:26	Yes	FC For Path(SA) Part II	Johannesburg	5	5	Appropriate	Appropriate	5	3	1	No		5	5	1	5	No	4	5	5	5	5	5	No		Maybe try and reduce the slight delay in audio. Although it was not a significant challenge	It was mice to not have to travel to another province and incur the costs associated with it, whilst still being examined fairly.	Lacking positive reassurance from visual cues given by examiner in a normal setting. Although it is not a given that you would receive that even in a face to face oral.	none
2020-10-05 13:41:43	Yes	FCS(SA) Final	Cape Town	5	5	Appropriate	Appropriate	5	5	3	Yes	The zoom calls were not stable and I found out the second clinical case also had answers in the questions	5	3	5	5	No	4	4	5	3	5	4	Yes	Internet connectivity	Improve internet speed	Fairness	That the clinical case 2 was cancelled	Please work on internet connection
2020-10-05 13:43:20	Yes	FCS(SA) Final	Cape Town	3	3	Too long	Appropriate	3	2	3	Yes	post pone the 1st clinical case	3	4	5	4	Yes	4	3	4	4	4	4	No		exams should be at the hospitals with our consultants who know there candidate well	zoom	missed the 1st case because of technical error	no
2020-10-05 13:50:06	Yes	FCS(SA) Final	Cape Town	3	4	Appropriate	Appropriate	4	4	5	Yes	I have the paper case1 first instead of clinical case connection was poor and couldn't her the examiners and have to restart the call many times	3	1	5	3	No	1	4	2	2	2	2	Yes	couldn't her the examiners clearly screen kept frizzing may times technician have to start new call and change the place of exam to another office	need to have a good plane, strong connection, more technicians	less moving	stressful process with connection issue	was an error to provide a clinical scenario with answers, which caused me a lot of anxiety
2020-10-05 15:35:44	Yes	FCS(SA) Final	Cape Town	3	4	Appropriate	Appropriate	4	4	5	Yes	I have the paper case1 first instead of clinical case connection was poor and couldn't her the examiners and have to restart the call many times	3	1	5	3	No	1	4	2	2	2	2	Yes	couldn't her the examiners clearly screen kept frizzing may times technician have to start new call and change the place of exam to another office	need to have a good plane, strong connection, more technicians	less moving	stressful process with connection issue	was an error to provide a clinical scenario with answers, which caused me a lot of anxiety
2020-10-05 15:42:53	Yes	FCS(SA) Final	Cape Town	4	4	Appropriate	Appropriate	3	4	3	Yes	internet connection delay	3	4	4	4	No	3	4	4	3	4	3	Yes	internet delay, interrupted voice	better internet/ computer	no need to travel	internet connection instability	no
2020-10-05 15:48:27	Yes	FCS(SA) Final	Cape Town	3	3	Too long	Appropriate	4	4	3	Yes	session terminated, examiners were logged out automatically mid sentence	3	4	2	1	No	3	3	4	4	4	4	Yes	session logged out	Consider having examiners in one area as well, multiple tech or internet issues	Every effort was made not for us to have the stress of zoom	cancellation of examination	structured based seems to be working well. also good that examiners are not expert in the field they asking on
2020-10-05 15:50:30	Yes	FCS(SA) Final	Cape Town	5	4	Appropriate	Appropriate	2	4	3	Yes	Poor network and audio. There was a room that was disconnected several times. it just made everything worse. Radiology pictures not clearly and scrolling skipping.	3	4	3	2	No	3	2	5	4	3	3	Yes	2nd exam. the pictures on the screen, obliterating the question. Slides presentation was not timed adequately in terms of showing a picture and asking a question.	1 technical centre for the examiners as well. Not sure if that will help so IT can resolve things quicker on their side.	Stayed local. Travelling could have added more stress to the process.	Technical glitches. led to @ clinical case being cancelled. Waiting period in between too long.	1st try. they will be mistakes. Maybe a clinical person (colleague) also available to facilitate some of the admin issues.
2020-10-05 16:29:23	Yes	FCS(SA) Final	Cape Town	3	3	Too long	Too short	2	3	3	No		3	5	1	5	Yes	4	3	4	4	4	4	No		shorter time between cases	local examination, no travelling	not being able to read body language	shorter days, less waiting time, more time in the examination
2020-10-05 16:29:41	Yes	FCS(SA) Final	Cape Town	3	3	Appropriate	Appropriate	3	3	2	Yes	disconnection	3	3	5	3	No	3	2	5	5	5	5	Yes	disconnection	improve internet speed	i didnt have to travel	long waiting time get me tired and lost concentration	Thank you
2020-10-05 16:38:26	Yes	FCS(SA) Final	Cape Town	3	3	Too long	Too short	2	3	3	No		3	5	1	5	Yes	4	3	4	4	4	4	No		shorter time between cases	local examination, no travelling	not being able to read body language	shorter days, less waiting time, more time in the examination
2020-10-05 16:38:32	Yes	FCS(SA) Final	Cape Town	3	3	Too long	Too short	2	3	3	No		3	5	1	5	Yes	4	3	4	4	4	4	No		shorter time between cases	local examination, no travelling	not being able to read body language	shorter days, less waiting time, more time in the examination
2020-10-05 16:47:08	Yes	FCS(SA) Final	Cape Town	4	4	Appropriate	Appropriate	4	4	3	Yes	Candidate 3201983 : I had about 4 disconnections (together with lag, sound quality few seconds prior to disconnection etc) during my clinical case that was really disruptive. I had to call the invigilator several times and the IT technician also came in. Part of the examination was done with me standing. I hope that I have done enough to pass this station considering the multiple disruptions	3	4	5	3	Yes	3	3	5	5	5	5	Yes	I have already alluded to the multiple disconnections during my clinical case that were majorly disruptive. Please refer to my previous statement	Make sure the lines/wifi are high speed and that there is good connectivity	Having stayed locally to do the examination. CMSA is quite familiar now and I enjoyed having done the exams in Cape Town	The fact that we had to wait without knowing what was happening with Clinical case 2. Also the whole '' exam mood"was somewhat spoilt	An institution based mark must come from the hospital/university that counts a good proportion towards the board exams because '' how good a surgeon is practically"' has not been examined by the current examinations
2020-10-05 17:16:19	Yes	FCS(SA) Final	Cape Town	3	5	Too short	Too short	5	5	1	Yes	I found the interpretation of imaging difficult to manage when not in control of the images. The CT images did not portray well via the online platform for more focused detail	5	5	4	3	No	4	2	5	5	5	5	No		The imaging needs to be reviewed on a local station. The images that are shared from one screen over the zoom platform are not of adequate quality to define smaller details	To be based locally in a huge relief. It alleviates a lot of the stress during an already very stressful time	Examination problem leading to the cancellation of a case on Day 1 with major waiting period between the first and second oral of the day	No
2020-10-05 17:20:35	Yes	FCS(SA) Final	Cape Town	3	4	Much too long	Appropriate	4	4	3	Yes	one Zoom Disconnection.	4	4	1	3	No	4	3	5	5	4	4	Yes	disconnection.	may be by inviting the examiners to set and doing the zoom from the CMSA offices rather than to do it from their own offices.	not to travel far to do the exam.	long waiting time.	no
2020-10-05 17:20:42	Yes	FCS(SA) Final	Cape Town	4	4	Appropriate	Appropriate	4	3	1	Yes	weak connection. difficult to hear the examiner	5	5	3	4	No	3	4	5	5	5	5	Yes	weak connection and difficult to hear the examiner sometimes	better connection	doing the exam in the same city	waiting time between the each season	I think it should be the default
2020-10-05 17:22:57	Yes	FCS(SA) Final	Cape Town	4	5	Appropriate	Appropriate	5	1	1	Yes		3	4	2	4	Yes	3	3	3	3	3	3	Yes		improve internet	have examiner far away from patient	bad quality of sounds	no
2020-10-05 17:28:51	Yes	FCS(SA) Final	Cape Town	3	5	Too short	Too short	4	3	2	Yes	speaker sound quality was not great	2	5	5	5	Yes	2	3	5	2	5	5	No		avoid delaying .. make another plan b for cases what happen today make all of us nervous	easier quicker fair less stressfull	nothing	good idea but need lot of care full and serious action
2020-10-06 14:29:51	Yes	FCS(SA) Final	Cape Town	4	4	Appropriate	Appropriate	3	3	3	No		3	3	3	3	No	3	4	5	4	5	5	No		.	n	n	no
2020-10-06 14:34:37	Yes	FCS(SA) Final	Cape Town	2	3	Appropriate	Appropriate	3	3	3	No		2	3	3	3	No	3	3	3	3	3	3	No		improving connection	time saving	stressful	no
2020-10-06 14:41:19	Yes	FCS(SA) Final	Cape Town	5	5	Appropriate	Appropriate	5	5	3	No		5	5	3	5	No	4	4	5	4	4	4	No		Improve internet	Cost	Internet supply	Yes
2020-10-06 15:13:19	Yes	FCS(SA) Final	Cape Town	4	4	Too long	Appropriate	4	3	2	No		3	4	2	3	Yes	4	3	4	4	4	4	No		Improve planning of the stations, long delays. Not able to leave the site, hinder time to read and revise	Home, familiar surrounding and staff very helpful	Long delays waiting	Nil
2020-10-06 15:14:49	Yes	FCS(SA) Final	Cape Town	4	4	Appropriate	Appropriate	4	4	2	No		4	4	3	3	No	5	3	4	4	4	4	No		internet connectivity	transparency of the exam	connection problem	no
2020-10-06 15:18:07	Yes	FCS(SA) Final	Cape Town	3	3	Too long	Too long	3	5	2	Yes	internet unstable	3	3	3	4	No	2	3	5	5	4	4	Yes	Connection problems, voices of the examiners were cutting	better internet connection	Less anxiety not facing the examiners directly	Waiting periods in between	No
2020-10-06 15:55:38	Yes	FCS(SA) Final	Cape Town	4	4	Too long	Appropriate	4	3	2	No		3	4	2	3	Yes	4	3	4	4	4	4	No		Improve planning of the stations, long delays. Not able to leave the site, hinder time to read and revise	Home, familiar surrounding and staff very helpful	Long delays waiting	Nil
2020-10-06 15:59:46	Yes	FCS(SA) Final	Cape Town	5	5	Much too long	Appropriate	5	5	2	Yes	dissconnection	3	5	5	3	No	3	3	3	3	3	3	Yes	disconnection	better connection	not travel	long waiting time	thank you
2020-10-06 16:00:13	Yes	FCS(SA) Final	Cape Town	3	2	Too long	Too short	3	4	1	No		3	4	3	3	No	4	4	4	4	4	4	No		longer time in the exam	lots of examiners,	stress	very good strategy in covid
2020-10-06 16:44:09	Yes	FCS(SA) Final	Cape Town	5	5	Much too long	Appropriate	5	4	1	No		5	5	4	4	No	4	4	5	5	5	5	No		shortening the waiting time between te cases	doing the exam in the same city	waiting time between each session	shortening the waiting time between every session
2020-10-06 16:45:12	Yes	FCS(SA) Final	Cape Town	4	4	Too long	Appropriate	4	5	3	Yes	frizzing	4	3	3	3	Yes	4	3	4	4	4	4	Yes	frizzing in someway	if moderatar or one if CMSA present at the exam	no need to travel	long waiting time	no
2020-10-07 09:00:36	Yes	FCS(SA) Final	Durban	5	5	Appropriate	Appropriate	5	5	5	No		4	5	3	5	No	5	4	5	5	5	5	No		Allow the candidates to be able to control the viewing of the images	Having the exam locally and not having to travel to another province. Examiners were fair in their questions. The invigilators were very pleasant and accommodating.	None.	No
2020-10-07 09:26:28	Yes	FCS(SA) Final	Durban	4	4	Appropriate	Appropriate	3	4	2	Yes	Internet connectivity problems	4	4	3	3	No	3	3	5	5	4	5	Yes	Internet connectivity problems, reconnected	Improved imaging on the CT scan resolution and candidates able to control CT viewing	No need to travel out of Province for exam	Long waits between cases	No
2020-10-07 09:56:51	Yes	FCS(SA) Final	Durban	4	2	Appropriate	Appropriate	5	5	3	No		3	5	3	5	No	4	5	5	5	5	5	Yes	Some issues with connectivity in one station. Was quickly resolved and other examiner took over questions so i dont feel disadvantaged due to it	The time waiting between each exam is awful, although that is a function of the number of candidates and not the Zoom platform	The examiners were generally fair and reasonable	The examination itself!	N/A
2020-10-07 13:51:38	Yes	FCS(SA) Final	Johannesburg	4	3	Appropriate	Appropriate	4	4	3	Yes	poor audio and slow feedback	4	5	2	5	No	4	4	5	5	4	5	No		allow for candidates to control the images if they would like to	the exam was fair and explored different topics	the waiting time between cases was very long,	no
2020-10-07 13:51:50	Yes	FCS(SA) Final	Johannesburg	3	4	Much too long	Much too long	3	4	1	Yes	Loss of examiner audio, imaging not projecting	3	5	3	5	No	5	5	5	5	5	5	Yes	loss of ec=xaminer audio and loss of imagimg imvestigation projection	shorter exams	no patient contact with all subjectivity it comes with ; ie poor historian patients and exhausted patients	the lenghth of the exam. its unreasonable to perform at peak over 3 days. the exam is too long.	We could have said what we typed to the examiner like we did with cases. There is no reason for a written osce.
2020-10-07 13:53:15	Yes	FCS(SA) Final	Johannesburg	3	4	Appropriate	Appropriate	4	3	2	No		4	4	4	5	No	3	4	2	2	4	2	No		None	Variable examiners	Unable to control imaging myself to make an assessment. Structured format of paper cases to not allow discussion, immediate short answers are required which do not reflect candidates insight.	No
2020-10-07 13:54:59	Yes	FCS(SA) Final	Johannesburg	3	5	Too short	Too short	3	3	3	No		4	4	4	4	No	4	4	3	3	3	3	No		i think osc must be done on zoom life meeting	clinical cases and oral	osc	no
2020-10-07 13:55:52	Yes	FCS(SA) Final	Johannesburg	3	3	Much too long	Appropriate	4	4	3	No		3	4	2	5	No	4	5	5	5	4	4	Yes	disconnected due to weather- reconnected	They were fine	The intimidation is slightly reduced	The examiner interrupting me	no
2020-10-07 13:57:04	Yes	FCS(SA) Final	Johannesburg	4	4	Too long	Appropriate	4	4	2	No		4	4	1	5	Yes	4	3	4	4	4	5	No		Not sure	Thank you organizing an exam for us even this challenging times	it was exhausting	No
2020-10-07 13:58:17	Yes	FCS(SA) Final	Johannesburg	3	2	Appropriate	Too short	3	4	4	No		3	3	2	3	No	2	3	3	3	3	3	Yes	at times difficult to hear	better audio equipment	didnt have to travel for exam	long wait periods, mentally exhausting to wait the whole day, not having your phone meant you could not talk to your family or google information you wanted to read	nil
2020-10-07 13:58:41	Yes	FCS(SA) Final	Johannesburg	4	4	Too long	Appropriate	5	5	4	Yes	Problems with Zoom connection	4	4	3	4	No	4	4	4	4	4	3	Yes	Zoom connection problems	Not able to comment	When the examiners are friendly, it is much easier to perform well	Hostile examiners	No thank you
2020-10-07 13:59:00	Yes	FCS(SA) Final	Johannesburg	3	4	Too long	Appropriate	3	4	5	No		5	5	3	5	No	5	5	5	4	4	3	No		The OSCE is unfair for long answers. should be yes no answers or "list"answers, or be done via zoom as well.	the zoom call exams were fair	the OSCE	Please have a look at the osce again
2020-10-07 13:59:15	Yes	FCS(SA) Final	Johannesburg	4	4	Appropriate	Appropriate	2	3	3	No		4	4	4	4	No	4	2	4	3	4	4	No	some time the sound not clear	image to be loaded on candidate computer for better interpretation	using new technology	waiting time	no
2020-10-07 13:59:37	Yes	FCS(SA) Final	Johannesburg	5	5	Too long	Appropriate	4	5	2	Yes	multiple failures with zoom	4	4	2	2	No	2	4	4	4	4	5	Yes	unstable network	have fewer osce stations	an opportunity to demonstrate what you know and learn about what i dont know	having to do the second clinical case on day 3 of the exam	no
2020-10-07 13:59:37	Yes	FCS(SA) Final	Johannesburg	4	4	Too long	Appropriate	4	4	3	Yes	occassional breaks in reception or internet connection during the oral sessions	4	5	2	3	No	4	5	4	4	4	2	Yes	as stated previously	the OSCE component required typed answers which requires far more time than usual as well as disadvantages certain candidates over others as all have different typing skill and speed	most zoom calls worked well without compromising the questioning	time during the osce component as well as uncertainty as this is a new format being used. Long waiting times between cases and the disruption due to the case that needed to be thrown out	non
2020-10-07 14:00:17	Yes	FCS(SA) Final	Johannesburg	3	4	Too long	Appropriate	3	3	3	Yes	cut off line during exam	3	4	3	4	Yes	3	2	4	4	3	4	Yes	cut off connection during exam.	to improve connection	to do your exam locally	cut the line during exam	no. thank you
2020-10-07 14:00:18	Yes	FCS(SA) Final	Johannesburg	4	4	Much too long	Appropriate	5	4	2	Yes	zoom interupeted and audio quality was sometimes poor	3	4	3	4	No	4	4	3	4	4	3	Yes	audio and visual cuts	provision of 2 days for examination	fair and standardized questions and scenario	the exam was long 3 days of examination incomprehensible blander of the second clinical case	-
2020-10-07 14:07:47	Yes	FCS(SA) Final	Johannesburg	3	4	Too short	Too short	5	4	5	Yes	In the last exam/OSCE-USING 2 MONITORS ENDED ME WRITING ANSWERS IN WRONG ENTRY!!!!!!!!!!!!!!!right answers in wrong space/answer space1	3	4	4	2	No	3	3	1	2	3	3	Yes	Couldnt hear well in one of Pathology station-examiner was blocked,not on video	Need to allocate more time	Fair treatment	OSCE:My answer sheet was misytakenly done for different questions	This was good
2020-10-07 14:11:15	Yes	FCS(SA) Final	Johannesburg	3	3	Too short	Too short	4	4	5	No		3	3	4	4	No	4	3	3	1	3	3	No		This was well run	Well run	No comment	Good
2020-10-07 15:07:07	Yes	Cert Gastroenterology(SA) Surg	Johannesburg	4	5	Appropriate	Appropriate	5	5	2	No		5	5	1	5	No	5	5	5	5	5	5	No		better way in displaying the CT scans and MRI	TO BE assessed by examiners from different training centres	nothing to recall	no
2020-10-07 18:58:34	Yes	Cert Gastroenterology(SA) Surg	Durban	3	4	Appropriate	Appropriate	2	4	1	Yes	Noise from the road. And the paper cases missed the history part.	3	4	1	4	No	1	3	4	4	4	4	No		Ensure that glitches like missing components of the exam are avoided	Breaks between the eaminations	the breaks were too long	no
2020-10-07 19:08:05	Yes	Cert Gastroenterology(SA) Surg	Bloemfontein	4	3	Appropriate	Appropriate	4	5	3	Yes	mixed up of case 1 and and imaging	5	4	3	5	No	5	5	4	4	4	2	No		happy with exam	not having to travel	initial panic but later calmed	none
2020-10-08 14:10:42	Yes	Cert Critical Care(SA) Anaes	Johannesburg	4	4	Appropriate	Appropriate	3	5	5	Yes	The information on the screen for the clinical case could be available on a paper format in addition so we can refer to the data.	4	4	4	5	No	4	4	3	3	3	2	Yes	no sound on the beginning of one case	Data sheet available	well runned	the waiting	no
2020-10-08 14:17:44	Yes	Cert Critical Care(SA) Anaes	Johannesburg	2	3	Appropriate	Too short	4	3	3	Yes	Speakers soft	3	4	3	4	No	3	5	5	5	4	5	No		bigger more clear speakers	not being in the same room as the examiners	to many short questions, chasing memorandum answers	don't stick too much to the memorandum answers, let it be open ended and make overall impression
2020-10-08 15:34:04	Yes	Cert Critical Care(SA) Emerg Med	Johannesburg	4	5	Appropriate	Appropriate	5	4	3	Yes	Screen Flickering initially. Audio sometime would cut out and I'd need the question repeated	4	5	2	4	No	3	4	5	5	5	5	Yes	Screen flickering was a loose wire resolved by the invidulator. Audio was resolved by me asking the examiner to repeat the question	Put everything on one screen?	Felt comfortable	Time in between but it cant be helped. Personal issue.	NO
2020-10-08 15:42:00	Yes	Cert Critical Care(SA) O&G	Johannesburg	3	3	Too long	Too long	5	3	5	Yes	could see shared screen but not examiners video	4	5	2	4	No	5	5	5	5	4	5	No		lt was well done	The invigulators were very helpful	The one examiner did not use the time allocation fairly and did not ask me the last question when there was still 5 minutes left	I would have liked the questions printed to be able to refer to them esp in the preparation questions-as sometimes when the screen changes you lose some vital information
2020-10-08 16:47:30	Yes	Cert Critical Care(SA) O&G	Johannesburg	4	3	Much too long	Too short	3	3	4	Yes	it was difficult to tell what the examiners wanted	3	4	3	4	No	4	3	4	4	4	4	No		not sure	overall examiners friendly	not knowing the answer	not sure
2020-10-08 16:52:19	Yes	Cert Critical Care(SA) Phys	Johannesburg	3	3	Much too long	Too short	4	2	5	No		3	3	5	3	No	4	4	3	3	2	2	No		Local examiner present	Excellent support from CMSA staff	long wait between examinations... exceeding 2hrs in the beginning and 3hrs at the end	No
2020-10-13 12:33:43	Yes	FCEM(SA) Part II	Cape Town	4	4	Appropriate	Appropriate	2	3	5	Yes	Sound and technical difficulties	4	5	3	2	Yes	1	3	4	4	4	4	Yes	Sound was cutting out	Mitigate technical issues	Local Structured	Technical difficulties	No
2020-10-13 12:37:31	Yes	FCEM(SA) Part II	Johannesburg	5	5	Appropriate	Appropriate	5	4	2	No		5	5	2	4	No	4	4	4	4	4	4	Yes	examiner froze for a few seconds, resolved spontaneously	exams were well run	cmsa staff very friendly	long wait between stations	no
2020-10-13 12:39:05	Yes	FCEM(SA) Part II	Johannesburg	3	3	Appropriate	Appropriate	3	3	3	No		3	4	2	5	No	5	3	4	4	4	4	No		well conducted	well organised	none	no
2020-10-13 12:48:14	Yes	FCEM(SA) Part II	Johannesburg	5	5	Appropriate	Appropriate	5	4	5	No		5	5	1	5	No	5	5	5	5	5	4	No		The CBA could be 100% interactive, meaning including the prep session	The ingenuity of the College to ensure the exam is conducted	I wish the CBA was more interactive and stepwise to simulate in-person kind of	I thank everyone involved in making this happen. God bless the College and Team
2020-10-13 13:03:16	Yes	FCEM(SA) Part II	Johannesburg	3	3	Appropriate	Appropriate	3	3	2	Yes	multiple delays and screens that froze mid quistions	3	3	5	3	No	2	3	2	2	3	2	Yes	multiple delays and screens froze mid question from the examiners	avoid bad connections	it was a shorter day	the delays and to keep asking to repeat the question	no
2020-10-13 13:09:31	Yes	FCEM(SA) Part II	Johannesburg	5	4	Appropriate	Appropriate	4	5	3	No		4	4	3	3	No	3	4	5	4	4	4	Yes	some audio disturbance, and can hear the exam next door is a bit distraction	sound proof the rooms	good instruction by the examination personal, good structure	audio disturbance and room is not sound proof	No
2020-10-13 13:19:58	Yes	FCEM(SA) Part II	Johannesburg	4	4	Appropriate	Appropriate	4	3	3	Yes	Connection , laging, had to move closer to the screen at times due to unfamiliarity of examination system	4	3	3	3	No	3	3	3	3	3	3	Yes	Connectivity, sound and having to move closer to the screen - probably due to unfamiliarity with the system of examination, delayed	Ensuring connectivity is pristine on the side of the candidate and examiners	The venue at the college, the waiting time inbetween stations and the staff at the coolege	None xperienced	No
2020-10-13 14:19:27	Yes	FCEM(SA) Part II	Johannesburg	5	5	Appropriate	Appropriate	5	5	5	No		5	5	3	5	Yes	5	5	5	5	5	5	No		Use external speaker for the sound instead of the laptop speaker	Not moving from computer to the other, being stationed on one computer station	Long waiting waiting periods	None
2020-10-13 14:21:46	Yes	FCEM(SA) Part II	Durban	4	5	Appropriate	Appropriate	5	4	2	No		5	5	3	5	No	5	4	5	5	5	5	No		setup was appropriate	Time given to real exam was appropriate	time for the preparation for the CBD and Critical Appraisal was a bit short	I think its huge step that is appreciated in this critical time and I think it will be good idea if its maintained for upcoming exams
2020-10-13 14:27:48	Yes	FCEM(SA) Part II	Cape Town	5	5	Appropriate	Appropriate	5	4	2	No		5	5	2	5	No	5	5	5	5	4	5	No		so far so good	was quick and cost saving.	unsure how i appeared before the examiners because i needed to face camera several times	so far so good
2020-10-13 14:30:56	Yes	FCEM(SA) Part II	Durban	3	3	Much too short	Much too short	4	3	1	Yes	The zoom call kept getting disconnected and I could not hear the examiners clearly	3	5	1	5	No	3	3	3	3	3	4	Yes	Zoom calls kept getting cut, but the connection was fixed	Arrange for a stable connection throughout	Less anxiety	The short time and contact with the examiner	No
2020-10-13 15:36:25	Yes	FCEM(SA) Part II	Cape Town	2	4	Appropriate	Appropriate	5	3	2	No		4	5	2	5	No	5	5	5	5	4	4	No		Set a uniform background behind examiners. Some had a "business'" location and other seemed in a domestic environment. It makes a difference in how "threatening"the session appeared.	Being able to conduct each station in the same room.	Long waiting periods which bred anxiety	Develop similar training platforms to allow candidates to gain familiarity with the format.
2020-10-13 15:41:21	Yes	FCEM(SA) Part II	Johannesburg	3	3	Too short	Too short	3	3	2	No		3	3	4	5	No	5	4	4	2	3	3	No		Not have to stay the whole day to only do the exam at the very end. Very tiring	Well organized, flowed well with on the spot problem solving, excellently managed	VERY long time to wait from morning as only did the exam late afternoon	Clearer directives concerning the prep questions. More emergency medicine orientated questions in the orals
2020-10-14 10:15:49	Yes	FC Psych(SA) Part II	Cape Town	4	4	Appropriate	Appropriate	3	4	2	Yes	Slight line lag at one point. Provided with material at the outset relevant to one station that the significance of which was not made clear.	4	4	2	5	No	4	4	4	4	4	4	Yes	Slight lag time during one interview, brief, self corrected.	Examiners could be grouped (at one or more local sites) where the internet connection is stable to prevent lag.	Well organised, friendly efficient staff at examination centre.	Handed a page to use in one station but the significance of the page was not clearly communicated at the outset.	Clearly explain what hand outs are for and to what station they are relevant.
2020-10-14 10:19:35	Yes	FC Psych(SA) Part II	Cape Town	4	5	Appropriate	Appropriate	5	5	3	No		5	5	2	4	No	5	5	5	5	4	4	No		Nothing that I can think of at this stage.	It was really well organised and I felt at ease, considering it was a completely new experience. I found it less anxiety-provoking than prior format.	Less able to elicit nonverbal communication/feedback with mock patient and examiner, but this was not a major factor.	No, just to say thank you for your innovation in planning and executing this exam under these unusual circumstances.
2020-10-14 11:29:57	Yes	FC Psych(SA) Part II	Durban	3	3	Appropriate	Appropriate	4	3	4	Yes	I lost time while there were technical challenges	3	3	5	4	No	5	3	5	5	3	3	Yes		Minimize technical glitches as they cause distress	Friendly examiners	Technical aspects	Please assist with technical problems
2020-10-14 11:37:49	Yes	FC Psych(SA) Part II	Durban	4	4	Appropriate	Appropriate	4	4	3	No		5	4	3	4	No	5	4	5	5	4	4	No		I liked the structure of the examination	I had time to plan my responses	None	No
2020-10-14 11:40:43	Yes	FC Psych(SA) Part II	Durban	4	4	Appropriate	Appropriate	3	3	2	No		3	4	2	5	No	4	4	4	4	4	4	No		separate preparation time to before each station	clear audio and videos	preparation time short	no
2020-10-14 12:33:51	Yes	FC Psych(SA) Part II	Cape Town	4	5	Appropriate	Appropriate	5	5	3	No		5	5	2	4	No	5	5	5	5	4	4	No		Nothing that I can think of at this stage.	It was really well organised and I felt at ease, considering it was a completely new experience. I found it less anxiety-provoking than prior format.	Less able to elicit nonverbal communication/feedback with mock patient and examiner, but this was not a major factor.	No, just to say thank you for your innovation in planning and executing this exam under these unusual circumstances.
2020-10-14 12:37:55	Yes	FC Psych(SA) Part II	Durban	5	5	Appropriate	Appropriate	4	4	3	No		4	5	3	5	No	5	5	3	2	4	5	No		since, It was a first time examinations, more practice is needed in this field.	the cost of not having to travel to a different examination site.	The problem of travelling abroad from another country due the Covid 19 pandemic.	no
2020-10-14 12:40:44	Yes	FC Psych(SA) Part II	Cape Town	4	5	Appropriate	Too short	4	4	1	Yes	I would have preferred the case scenarios to be printed out.	5	5	5	4	No	3	4	4	5	5	5	Yes	the video froze for sometime and the audio faltered also	please print out the case scenario's	not travelling far distances to the exam venue	having too many observers in one station there were 5 people in the one station	no
2020-10-14 12:40:45	Yes	FC Psych(SA) Part II	Cape Town	4	4	Appropriate	Appropriate	3	5	3	Yes	Signal was lost for a few seconds at a time in one station.	4	4	2	4	No	3	3	4	4	4	3	Yes	Signal was lost for a few seconds at a time in one station	no answer	well organised	anxiety about technical problems	No
2020-10-14 12:41:04	Yes	FC Psych(SA) Part II	Cape Town	5	5	Appropriate	Appropriate	5	5	2	Yes	for a few seconds, image froze	5	5	1	5	No	5	5	5	5	5	5	Yes	video came back on in few seconds	Have half people write written first and others do video first	I liked that it started later, reduced anxiety of traffic and allowed me to sleep better	Anxiety of having technical glitch or dropout	Nil
2020-10-14 21:38:19	Yes	FC Psych(SA) Part II	Bloemfontein	5	4	Too short	Too short	4	4	4	Yes	The time allocated for the written Stations was too short especially for the approach requested. There was no time to go back to recheck answers.	4	5	5	5	No	5	5	5	5	5	5	Yes		The written Stations were not allocated enough time.	The Zoom stations were well organized and less intimidating.	Limited time for the written Stations. There wasn’t enough time for the approach required to answer questions (Having to type it) and Still to go back and recheck answers before submitting.	The Oral Zoom was perfectly structured and ran smoothly.
2020-10-15 00:41:28	Yes	FC Psych(SA) Part II	Port Elizabeth	2	3	Too long	Too short	1	3	2	Yes	I never got the instruction that I was supposed to go through all stations at the beginning. At the beginning of my second and 3rd station, I had the examiners read the scenario for me because I still had the scenario for the 1st Station on the computer. This means no time for me to go through the scenario and have few minutes to prepare and organize myself.	3	3	5	5	No	5	5	5	5	5	5	Yes	As indicated above.	More training for invigilators	The examiners were kind and patient	The instruction not communicated which meant no preparation time	No
2020-10-15 05:08:12	Yes	FC Psych(SA) Part II	Johannesburg	5	4	Much too long	Too long	3	5	2	Yes	The instructions at the beginning of the exam were not clear to the candidates as a results most of us struggle with our first cases	3	5	1	5	No	5	5	5	5	5	5	No		We had three stations to go through before starting the zoom meeting,because instructions to the candidates were not clear people only prepared for one station and they were shocked to be assessed on the other two stations	Trying new things	The exam was too long The exam was nothing close to what we were told in the workshop,short answers	Typing stations must be short answers responses Give clear instructions at the beginning of zoom meetings
2020-10-15 11:17:47	Yes	FC Psych(SA) Part II	Umtata	4	4	Appropriate	Too short	3	4	3	No		4	5	4	5	No	4	3	5	5	5	5	No		No comment	Less anxiety	Typing speed	No
2020-10-15 11:45:59	Yes	FCFP(SA) Final Part A	Johannesburg	5	5	Appropriate	Appropriate	5	5	1	No		5	5	1	5	No	5	5	5	5	5	5	No		More questions needed	Cases were straight to the point	None	none at present
2020-10-15 11:47:13	Yes	FCFP(SA) Final Part A	Johannesburg	5	5	Too short	Too short	5	4	5	No		4	5	5	5	Yes	5	5	5	5	5	5	No		Improve timing, add more time	preparation stations	time allocation	no
2020-10-15 11:50:55	Yes	FCFP(SA) Final Part A	Johannesburg	3	4	Too short	Too short	4	5	4	No		3	3	4	5	No	5	4	4	4	3	2	No		more case scenarios	less anxious but time conscious	time factor for some questions	sticking to a very strict time allocation per question might be helpful
2020-10-15 11:58:02	Yes	FCFP(SA) Final Part A	Durban	5	5	Appropriate	Appropriate	5	5	5	No		5	5	5	5	No	5	5	5	5	5	5	No		This zoom exam was acceptable	I was happy to be far from the examiners because they stress us. It will also be easy to claim when I disagree with the marks.	None	I request CMSA to continue with zoom exams. It is not good when the examiners are together in the same room as it is easy for them to influence each other and fail the candidate.
2020-10-15 13:28:06	Yes	FCFP(SA) Final Part A	Bloemfontein	5	5	Appropriate	Appropriate	4	5	1	No		4	4	2	5	No	5	4	5	5	5	4	No		Clear time for reading the question. I didn't have 5 minutes to read first question but got it for the other questions	Cost saving on transport, Talking without someone looking at you.	Its difficult to time yourself when answering questions.	I was impressed. The venue was quite.
2020-10-15 13:28:56	Yes	FCFP(SA) Final Part A	Johannesburg	5	5	Appropriate	Appropriate	5	3	3	Yes	freezing of zoom call	3	4	1	5	Yes	5	4	5	5	4	4	Yes	freezing during zoom call from examiners side	N/A	being able to make notes and have prep time	N/A	well organized
2020-10-15 13:29:09	Yes	FCFP(SA) Final Part A	Johannesburg	5	5	Appropriate	Appropriate	5	5	1	No		5	5	1	4	No	5	4	5	5	5	5	No		as usual	all	nil	well done
2020-10-15 13:35:04	Yes	FCFP(SA) Final Part A	Johannesburg	5	5	Appropriate	Too short	2	4	3	Yes		3	5	4	2	No	5	4	2	3	3	4	Yes		Inform the candidates how the eamination will be conducted	not meeting the examiners to reduce tension	vague experience	educate the candidates before time
2020-10-15 13:36:10	Yes	FCFP(SA) Final Part A	Cape Town	2	3	Too long	Too short	3	3	3	No		3	3	4	4	No	4	4	3	4	3	3	No		give for time for preparation prior to questions from examiner	didnt have to travel	Time factor to prep for question	no
2020-10-15 13:37:33	Yes	FCFP(SA) Final Part A	Umtata	2	3	Appropriate	Too short	3	2	4	Yes	TIME DIFFICULTIES BETWEEN CASES, INITIALLY SLIDES PRESENTED WAS TO SMALL AND COULD NOT READ THE QUESTIONS	3	4	5	5	No	3	4	4	4	4	3	No		For the FCFP exam if is difficult to express the holistic approach on zoom if your can't elicit it on a patient, and this is not evaluated	Easy access to facility and less time consuming with less traveling	Unclear preparation for the exam as the format had changed	6 Questions was answered and when you express an answer in a previous question you expect this is now covered, but then another question gets asked where you already incorporated some of the answer in the previous question. Also due to the format change, the preparation for this exam was very unclear and what to be expected during the oral
2020-10-15 14:08:06	Yes	FCFP(SA) Final Part A	Johannesburg	5	5	Appropriate	Too short	4	3	3	Yes	Scheduling of my slot	4	4	3	4	No	4	4	4	4	4	3	Yes	My first station was postponed till after the exams	Timing	Access and cost	Schedule interruption	If able to
2020-10-15 15:02:18	Yes	FCFP(SA) Final Part A	Durban	4	4	Appropriate	Appropriate	3	4	5	No		3	2	5	5	Yes	5	5	5	5	3	1	No		i think face to face examinations are better	not having to leave the province for exams	Not understanding the questions quite clearly, i was not sure of what was expected of me	no
2020-10-15 15:15:35	Yes	FC Psych(SA) Part II	Bloemfontein	5	4	Too short	Too short	4	4	4	Yes	The time allocated for the written Stations was too short especially for the approach requested. There was no time to go back to recheck answers.	4	5	5	5	No	5	5	5	5	5	5	Yes		The written Stations were not allocated enough time.	The Zoom stations were well organized and less intimidating.	Limited time for the written Stations. There wasn’t enough time for the approach required to answer questions (Having to type it) and Still to go back and recheck answers before submitting.	The Oral Zoom was perfectly structured and ran smoothly.
2020-10-15 21:38:42	Yes	FC Psych(SA) Part II	Port Elizabeth	4	4	Appropriate	Appropriate	2	4	2	Yes	The cases and questions were quite long. It felt very rushed to read it all on a laptop. Would have been easier if it was just printed. The laptops were placed outside the exam room for internet access. Could hear the other candidates inside - very distracting when you only have 15mins to prep	4	4	2	4	No	4	3	5	5	4	4	No		Print the cases and let us make notes on the physical paper. The day was very long with a lot of waiting. Not sure what would be a better option	No need for travel, knowing the venue and my colleagues well	Unknown format. Having to read of a screen and not being able to highlight and make notes and focus. The long wait periods	No
2020-10-16 09:33:38	Yes	FC Psych(SA) Part II	Johannesburg	3	2	Too short	Too short	2	2	4	Yes		3	3	3	3	No	4	3	3	3	3	3	No		It would have been easier to get each scenario per station instead of getting all the scenario in one go. Initially I expected for my first station to start with scenario 1 and I was taken by surprise when I started with scenario 3 while I had walked in expecting scenario 1.	The new arrangement was convenient (less traveling and I didn't have to arrange accommodation because the venue was nearby.	The structure was confusing: they gave us all 3 scenarios in one go. I was under the impression that the first station would be scenario 1,however, I was confused when my first station was scenario 3 instead of 1.	Please improve on the structure : clearer instructions will be appreciated. Thank you.
2020-10-16 14:40:05	Yes	FC Psych(SA) Part II	Bloemfontein	2	3	Too long	Too short	4	3	4	No		2	3	3	5	No	3	4	3	3	2	2	No		More cases on zoom then written cases	Safety. And not travelling	The time was too short	None
2020-10-16 14:40:07	Yes	FC Psych(SA) Part II	Port Elizabeth	3	4	Appropriate	Appropriate	3	3	1	Yes	Sound was not clear throughout the exam. Concern about whether my sound was being received properly aswell?	4	4	3	5	No	2	3	5	5	4	4	Yes	Audio. Examiner repeated himself	Allow more time between stations. It felt rushed. Limited the amount of time available to sort out technical issues.	I could be in a familiar environment during the exam, surrounded by less people. As a anxious person this helped me.	The overall length of the exam for the day. Would have preferred having the exam over 2 days	No
2020-10-16 14:54:42	Yes	Cert Gastroenterology(SA) Surg	Johannesburg	5	5	Appropriate	Appropriate	5	4	1	No		5	5	1	5	No	4	4	5	5	5	5	No		I believe it was well orchestrated, only the rescheduling 48hrs before was unpleasant.	It was very well organised and constructed	The rescheduling	No
2020-10-16 15:45:15	Yes	FC Psych(SA) Part II	Johannesburg	2	3	Much too long	Much too short	2	2	4	Yes	I accidentally pressed a key that froze and restarted my online examination. I had to wait for the invigilator to call IT to retrieve my information. The whole experience was quite traumatizing.	1	4	2	5	No	5	3	4	4	4	5	No		Each zoom station should have a separate preparation period, rather than having 15 mintes to prepare all the zoom stations at once.	None	One of the invigilators was extremely rude, and went as far as telling us that we deserve to fail for not listening during the zoom exams. Exams are anxiety provoking and having an invigilator tell candidates that they deserve to fail is highly inappropriate. The written component was far too long because we were expected to answer questions in a script format as if we were speaking to the patien…	The instructions and case scenarios need to be placed outside each station.
2020-10-16 19:25:57	Yes	Cert Gastroenterology(SA) Surg	Bloemfontein	4	4	Appropriate	Appropriate	2	4	3	Yes	Problems were only with my clinical cases part. My observers were not sure and trying to match clinical case to correct images. When asked if I can figure them out I felt it will waiste the time I am given. And ultimately before the starting time I was informed the match is correct and when I took my position I was shown how they are matched. But the clinical scenarios of case 2 and 3 were not sh…	5	4	4	5	No	4	5	5	5	3	2	No		Ensuring correct information is received in all sectors	Mentioned in initial assessment filled	Exiety in the clinical cases	No. I am happy the rest was good. Thanks
2020-10-19 10:52:14	Yes	FC Psych(SA) Part II	Johannesburg	4	4	Much too long	Much too long	2	4	4	Yes	The font was way too small The answer boxes were too compact The article should have been a pdf not jpg The exam was an oral exam directly expected to be a written exam Psychiatry is about communication and relationships Which cannot be assessed on a written exam Didn’t seem like much thought was put into the exam Felt like was a last minute decision To soften the blow extra time was given which …	1	3	3	1	Yes	3	1	4	4	3	3	Yes	The examiners, the candidates and the organizers were not on the same page I personally found myself disoriented as I was not clear which case was first or next Found myself having prepared thoroughly the first case and having to start at third case It’s not a train reck but I feel could have performed better had the Once off training on the 4th was anything to go by	More training for all involved For teaching to be geared towards new way of doing things For one massage same massage to be communicated to all For no special information for special candidates It’s demoralizing to work hard and unfairly compete with candidates who already know what to expect	Honestly besides saving money for travel and accommodation , nothing It was stressful as information was not flowing as it should have been Yes the exam was new to all of us examiners included, but communication was bad	Poor communication Lack of organization	More training for all involved
2020-10-26 14:49:59	Yes	FC Paed Surg(SA) Final	Johannesburg	4	4	Appropriate	Appropriate	4	5	4	No		4	5	3	5	No	5	3	5	5	5	5	No		By not postponing	It felt more relaxed	Nothing more than exam jitters	No
2020-10-26 14:57:30	Yes	FC Paed Surg(SA) Final	Johannesburg	5	5	Appropriate	Appropriate	5	4	3	Yes	Sound issues initially	5	5	3	5	No	5	5	3	5	5	4	Yes	Sound problem initially	External microphone	Quality of visual materials	None	No
2020-10-26 15:03:19	Yes	FC Paed Surg(SA) Final	Durban	4	4	Much too long	Appropriate	3	4	2	Yes	Most examiners had their cameras switched off; one of the examiners struggled to present the case based slideshow.	4	4	3	1	No	5	4	5	5	4	4	Yes	An Examiner struggled to load slideshow presentation; many of the participating examiners / moderators had their cameras switched off - it's a bit offputting to be fair.	All examiners must be visible during the exam. A straightforward guide for examiners so there are no technical glitches.	Typing answers in the exam was easy; a drop down box method or multiple choice would be even easier of course within limitation of giving the answers away...	It can feel a bit lonely, and of course it is stressful.	I think it is a very good platform for examination.
2020-10-27 14:27:32	Yes	FC Paed(SA) Part II	Bloemfontein	5	5	Too short	Too short	4	2	5	Yes	difficult to hear the examiner at times	4	4	2	4	Yes	3	4	4	4	2	1	No		not applicable	Short cases much more organized than local long cases	poor delayed communication by CMSA	no
2020-10-28 14:33:49	Yes	FC Paed(SA) Part II	Umtata	5	5	Too short	Too short	5	5	4	No		5	5	3	5	No	5	5	5	5	5	5	No		To have examiners show more reactions, so that one knows when he's offramp	less anxiety for not having face to face and possible difficult crying baby,	fear of the unknown and general anxiety.	zoom seems very nice and fair especially for candidates like me who struggle with anxiety and get very helpless and dissorganised in the presence of triggers life an unhappy examiner and restless child
2020-10-29 09:04:32	Yes	FC Paed(SA) Part II	Durban	3	3	Too short	Too short	2	3	3	No		3	3	1	4	No	4	3	3	3	3	4	No		maybe having many computers ,because thw waiting time was too long between the exams	the level of anxiety was less, compared to face to face	worrying about not projecting well / being audible to the other side also it limited interation especially with counselling and history taking stations	no
2020-10-29 09:09:24	Yes	FC Paed(SA) Part II	Durban	5	5	Appropriate	Appropriate	3	5	2	Yes	developmental station video - proble,s with viewing video initially, thereafter video froze in between as it was playing	5	5	1	5	No	5	1	5	5	4	3	Yes	developmental station video - took a while to get started and had difficulty viewing the video - problem seemed to be on side of examiner	have the video saved on the hard drive/preloaded on the candidate side	the examiners were amazing and very understanding to this new format and made me feel as comfortable as possible	the glitche in the video - which was an integral part of my assessment in the developmental sation	no
2020-10-29 09:37:46	Yes	FC Paed(SA) Part II	Durban	5	5	Too long	Appropriate	5	5	4	No		5	5	2	4	No	5	5	5	5	4	4	No		it was good organization. only the exam took long time , required 3 days	all the candidate were having same scenario , it is fair for all	waiting time , either before or after exam	no
2020-10-29 10:02:14	Yes	FCP(SA) Part II	Durban	4	4	Appropriate	Appropriate	5	5	4	No		4	5	5	4	No	5	5	5	5	5	4	No		well organised exam	in Covid situation , this way of exam is very nice to decrease risk of transmission	in some station which need to speak to Role player , i found difficult to keep look to camera and to the role player on same time , because if i keep look to role player it looks that i look down	Thank you for your organisation
2020-10-29 11:43:46	Yes	FC Paed(SA) Part II	Durban	5	5	Too long	Appropriate	5	5	4	No		5	5	1	5	No	5	5	5	5	5	5	No		Instead of having the exam over 3 days, have it over 2 days	I was comfortable and at ease knowing that my examiner is not with me physically. Sometimes examiners can be very intimidating.	Time factor. Waiting for too long before being allowed to go home.	Excellent, organised service. Friendly invigilators. Keep up the good work. I am impressed.
2020-10-29 11:44:28	Yes	FC Paed(SA) Part II	Durban	3	4	Much too long	Appropriate	5	3	5	No		3	4	1	5	No	5	3	5	5	3	3	No		Better quality of photos of signs provided. Better details given with regard to patient information on cases	Not having to travel. Less intimidating over zoom as opposed to face to face with examiner.	Some photos of patient signs were not clear. Inadequate patient information in some stations.	Nothing else
2020-10-29 12:06:41	Yes	FC Paed(SA) Part II	Durban	3	3	Appropriate	Appropriate	3	2	4	No		2	2	5	4	Yes	5	5	5	5	5	5	No		no comment	no comment	no comment	no
2020-10-29 12:30:51	Yes	FC Paed(SA) Part II	Durban	4	3	Too long	Appropriate	5	4	3	No		4	5	2	5	No	5	5	5	5	4	5	No		Nil	Amazing staff - we were well looked after	Nil	Nil
2020-10-29 12:38:45	Yes	FC Paed(SA) Part II	Polokwane	5	4	Appropriate	Appropriate	5	5	2	No		5	5	3	5	No	4	4	5	5	5	5	No		run a full mock exam on different dates for different centres, to give an idea prior to the exam	the examiners were audible and able to give guidance and clarity when needed	nothing much.	keep up the good work in making sure the college produces candudates that are ready to be specialists in the field
2020-10-29 12:41:36	Yes	FC Paed(SA) Part II	Polokwane	4	4	Too long	Appropriate	2	4	3	No		3	4	3	4	No	4	4	4	4	3	3	No		lessen the number of days waiting period is long bigger screens	cost and time saving	waiting period before and in between the stations	none
2020-10-29 12:42:22	Yes	FC Paed(SA) Part II	Polokwane	3	3	Too long	Appropriate	5	4	2	No		4	4	1	5	No	5	5	5	5	4	5	No		cut short the waiting time after exam or prior	1.Being able to see the examiners(person you are talking to) 2. Cost efficient	none	this is worth exploring
2020-10-29 12:43:10	Yes	FC Paed(SA) Part II	Polokwane	5	4	Appropriate	Appropriate	5	5	4	No		5	4	1	5	No	5	5	5	5	4	4	No		Show us papers on zoom with vital signs and anthropometry plotted,when asked by candidate. Pictures should be clearl and system specific for guidance	cost-effective,less anxiety compared to face to face,we were given enough time	we might need more practice on virtual exam and mock exams to be done continously via zoom	No
2020-10-29 13:10:20	Yes	FC Paed(SA) Part II	Cape Town	4	4	Much too long	Too short	2	2	4	No		4	4	3	4	No	2	4	4	2	4	4	No		reduce the number of days. was exhausting to do it over 3days	the invigilators were amazing. the role plyaers amazing	unclear questions from examiners	some questions and scenarios were not clear to the candidate.
2020-10-29 13:12:19	Yes	FC Paed(SA) Part II	Cape Town	4	4	Much too long	Appropriate	3	3	4	Yes	slight delay in the history station. Video developmental station was not filmed in order to maximise ability to make clinical judgement,	4	4	3	2	No	4	1	4	4	4	3	Yes	Slight freeze/ delay during history station. obstructed view of video with zoom screen of moderator, candidate and examiner visible.	5 hours of waiting time for 40 minutes of exams over 3 days is very drawn out. Perhaps less waiting time in between stations and fewer fays of exams.	staff very friendly and acocmodating. exam process ran smoothly.	very long waiting hours pre and post exam was exahusting. especailly after almost a year of waiting for the clinical post written. whole process was very very drawn out. Video of developmental station was not ideal quality and visability of patient was not possible throughtout the video.	none- thank you.
2020-10-29 13:12:29	Yes	FC Paed(SA) Part II	Cape Town	4	4	Much too long	Too short	3	3	4	Yes	the video in the developmental station was not clear, some examiners were not familiar with zoom, technical delays in starting the examination	4	3	4	2	No	2	2	4	4	3	3	Yes	As above	make sure that everyone has formal zoom teaching, better quality videos	the staff at CMSA were friendly, welcoming and the set up was very well run	the entire exam process was lengthy and exhausting and the wait post exam was excruciating	no
2020-10-29 13:12:39	Yes	FC Paed(SA) Part II	Cape Town	5	5	Appropriate	Too short	5	3	1	Yes	i did not getthe history on the history taking station.The developmental video sound was interrupted	5	5	1	1	No	5	5	5	5	5	5	No		can give the case snarios on hard copy to save time during the 5 minutes prep time	i was more calm	they could have provide us with lunch and tea	no
2020-10-29 13:13:05	Yes	FC Paed(SA) Part II	Cape Town	4	4	Appropriate	Appropriate	3	3	3	Yes	Video was unclear, and did not run smoothly	3	3	4	2	No	2	2	4	4	3	3	Yes	Some delays with starting the exams	Examiners were not clearly visible on the screen and volume was not loud enough at times.	Exams done locally, no travel required	Over three days, long waiting periods	Video stations should be clearer. The emergency station for short case needed to be constructed more in an APLS manner, with feedback provided as an intervention is done.
2020-10-29 13:14:18	Yes	FC Paed(SA) Part II	Cape Town	5	5	Appropriate	Much too short	4	5	5	No		5	5	3	5	No	5	5	5	5	5	5	Yes	the exam material that was supposed to be visible for me during the preparation time was not available (i.e not shared by the examiner), so i started my examination ( the 10 minutes whilst simultaneously reading the case. I feel this impacted on the way I would have performed in the case (ie seeing the case during the 5 minutes preparation time as i was informed instead of only seeing it during t…	brief all the examiners on what is expected as in examination technique and sharing of screens so that both the candidate and the examiners have the same expectations .	yes, the questions were fair, the experience although new and daunting made me feel as if it was fair and of the appropriate level for a newly qualified paediatrician	As above ( not sharing the screen with the case during the 5 min prep time)	No. well done considering that this is the first attempt. The staff at CMSA cape town were so friendly, competent and made this experience so enjoyable and less stressful. Well done to all involved in this process!!!
2020-10-29 13:15:49	Yes	FC Paed(SA) Part II	Cape Town	5	5	Much too long	Too short	5	3	5	Yes	neuro video was glitching and dragged. difficult to see if the child was ataxic or not	4	5	5	5	Yes	5	5	5	5	1	5	Yes	the video exam has a lag time when the child was walking. the resolution was low on the video.	have more clarity on the structured oral examination. it is not clear if it is another short case or not.	was good clear cases. was also well organised.	not understanding what the examiner wants specifically.	vague questions in the discussion period. also to ask for history in the short case is a bit confusing and should ideally be removed. it made it look like a mini long case when its an emergency station
2020-10-29 13:16:37	Yes	FC Paed(SA) Part II	Cape Town	5	5	Appropriate	Too short	5	5	5	No		5	5	3	4	No	5	3	5	5	3	1	Yes	in one station, my photo was obscuring the vignette given. The video didn't play well and we didn't have a clear view of the patient.	For the video station, to have an option of watching the video twice if you would like to do so because in a real case scenario when examining a patient, you can repeatedly ask the person to do something. Some of the stations should be made realistic, like the emergency station, in a real life situation, the patient comes in , you don't get history first the ask to see the patient	The fact that it was a uniform examination in terms of scenarios. we al got the same scenario so that made it a very fair examination. It was a smoothly run process considering it was a pilot exam.	The waiting in anticipation and not knowing the results immediately.	No
2020-10-29 13:21:12	Yes	FC Paed(SA) Part II	Cape Town	3	4	Too long	Too short	2	4	3	Yes	1)The video for the developmental station froze at some points . 2)Loss of sound/Audio 3)The history for the emergency scenario was a bit vague, and it would have been better to show the candidate the image of how the child looks upon arrival in the emergency room as the extra clinical details are given. 4)warning message for time remaining eg..would should be less distracting ..a pop up message …	3	4	3	2	No	4	3	5	5	4	5	Yes	audio froze but returned spontaneously	N/A	Having a person assigned to me	The long wait	Thank you for assigning a person specifically for each candidate
2020-10-29 13:22:06	Yes	FC Paed(SA) Part II	Cape Town	4	5	Much too short	Too short	4	5	5	Yes	Developmental station: the video kept freezing and could not assess certain sections properly.	4	4	5	4	No	3	3	1	1	2	2	Yes	developmental station - video froze at some point, interview was conducted mainly in Afrikaans. History station: I did not get the 5 min to read the scenario and prepare, as a result I was reading the scenario and conducting the interview at the same time. I brought it up with the invigilator and they were not sure....at the end of the exam while sitting with the other candidates, a couple of can…	try and make it as real as possible	The lady who acted as the mother is the history and communication station was excellent. allocating an same invigilator to each candidate really helped me calm down begore the station. overall all the staff were friendly and accomodating .	the time was too short	a
2020-10-29 14:21:27	Yes	FC Paed(SA) Part II	Cape Town	4	5	Much too short	Too short	4	5	5	Yes	Developmental station: the video kept freezing and could not assess certain sections properly.	4	4	5	4	No	3	3	1	1	2	2	Yes	developmental station - video froze at some point, interview was conducted mainly in Afrikaans. History station: I did not get the 5 min to read the scenario and prepare, as a result I was reading the scenario and conducting the interview at the same time. I brought it up with the invigilator and they were not sure....at the end of the exam while sitting with the other candidates, a couple of can…	try and make it as real as possible	The lady who acted as the mother is the history and communication station was excellent. allocating an same invigilator to each candidate really helped me calm down begore the station. overall all the staff were friendly and accomodating .	the time was too short	a
2020-10-29 14:27:22	Yes	FC Paed(SA) Part II	Cape Town	5	5	Much too long	Appropriate	5	5	4	No		5	3	1	5	No	5	5	4	3	3	1	No		i thought i good job was done, no critism	well thought out	unfortunely the duration of the examination process is tedious. I understand that we are walking in uncharted land and really appreciate all the effort and time that went into organising these exams so thank you to everyone. if this platform goes ahead it would be preferable to have wrapped up the exams in a shortest time frame although i totally understand that the logistics behind the scenes mu…	thanks to everyone i know it has been tough times and you have pulled off a fair and comprehensive exams.
2020-10-29 14:30:44	Yes	FC Paed(SA) Part II	Bloemfontein	4	4	Too short	Too short	3	2	4	Yes	1) There were technical audible issues with cases on day 1 2) The video quality was extremely poor - not certain if it is due to streaming or quality of video itself. Video would freeze when patient was walking and freeze when patient was drawing shapes which made it difficult to make crucial assessments - this was mentioned to the examiner during the session	4	3	1	4	Yes	4	1	3	3	3	2	Yes	Video quality for developmental assessment extremely poor - not adequate enough for proper assessment. Having a narrator speak over the patient when they are speaking and then trying to assess the child's speech was impossible. Videos perhaps should be in English should this continue to be the language medium for the exams	Better Video quality - candidates are now left feeling disadvantaged regarding final assessment Time before the case commences so to introduce oneself and for the examiners to introduce themselves would have been preferable	Well organized. Invigilators were great. The exams are far more fair not having consultants from the department present at the examination	Local examinations - long cases - were disorganized and candidates were only informed 10 days before the exam when it would take place. During local examinations - 4 Consultants present at the examination feedback station. This seemed unfair and intimidating	None
2020-10-29 14:41:24	Yes	FC Paed(SA) Part II	Cape Town	5	5	Too short	Too short	4	5	4	Yes	the last case it washard to hear however most station went well	5	4	2	4	Yes	4	5	5	5	5	5	Yes	could not hear properly, was short lived, examiner spoke into mic and i repeated back the question for clarity. All other sessions were ok	1. put timer on the screen 2. Reduce the number of days to 1 day only (I do understand it was the first one)	1. Invigilators were very supportive and accommodating, they gave us 5 star treatment, Thank you very much. 2. Examiners were very empathetic 3. The Zoom Mock exam was reassuring, thank you for giving us clarity 4. Though it was unpleasant to wait for 2 hours before exams starts, I did appreciate the session slots 5. It was very organized, I commend the team	The uncertainty of when the Orals are scheduled, The Surprised long cases that had no definite date either. Waiting for session to start	Thank you for standardizing it and making it fair. However maybe use the approach of the clinicals of dividing candidate into different days instate of same days different session. Its exhausting and we risk accidents on the road. I know it has been a difficult time for all of us, I do appreciate all the effort that went into this exams. be blessed
2020-10-29 14:44:48	Yes	FC Paed(SA) Part II	Bloemfontein	5	5	Appropriate	Appropriate	4	5	1	Yes	video quality	5	5	1	5	No	5	4	4	1	5	3	Yes	video quality	more cases on the same day	being able to show what i know	nil	no
2020-10-29 14:52:22	Yes	FC Paed(SA) Part II	Cape Town	4	4	Appropriate	Appropriate	4	4	3	No		4	4	1	4	Yes	3	4	3	3	4	3	No		Have exams on one day only	Being able to illustrate my knowledge	Stretching the exam over 3 days.	Yes
2020-10-29 14:52:27	Yes	FC Paed(SA) Part II	Durban	4	5	Much too long	Appropriate	5	4	3	No		4	4	2	5	No	5	4	5	5	3	1	Yes	Just a minor case of not hearing the examiner for 5 seconds but it was corrected	I think it was reasonable, I don't see any other way to improve thus far	Examining locally	Prolonged fragmented exam due to the Corona virus pandemic	No
2020-10-29 14:57:28	Yes	FC Paed(SA) Part II	Cape Town	5	5	Appropriate	Too short	4	5	3	No		5	5	1	5	No	4	4	5	5	3	2	No		Perhaps more seamless transition between cases, there was occasionally some confusion although it was not significant enough to affect the flow of the examination	Consistency (exam in same room, same invigilator, same structure, consistent and predictable format)	Difficult to conduct communications via zoom, interpersonal aspects compromised by screen set up	No
2020-10-29 15:15:28	Yes	FC Paed(SA) Part II	Cape Town	4	4	Appropriate	Too short	5	4	5	No		4	4	2	5	No	4	4	5	5	4	3	No		To do more stations on one day if possible	It was a very well run and organised exam. It also helped that it was local and there was no travelling involved.	Having to wait so long after orals to complete it but understandably that was COVID's fault	No
2020-10-29 15:17:12	Yes	FC Paed(SA) Part II	Bloemfontein	5	5	Appropriate	Appropriate	5	5	3	Yes	video station sound but was sorted	5	5	3	5	No	5	5	5	5	5	5	Yes	video station but it was sorted (sound)	it was fine	help to lower the anxiety and stress	none	no
2020-10-29 15:19:16	Yes	FC Paed(SA) Part II	Durban	5	5	Too long	Appropriate	5	5	4	No		5	5	2	5	No	5	4	5	5	4	4	No		To ensure good internet at all examiners areas	It was slightly less intimidating as examiner was not next to you. Exam ran very smoothly and was a pleasant experience.	None as my slot had not too much waiting time.	No
2020-10-29 15:19:24	Yes	FC Paed(SA) Part II	Cape Town	5	5	Much too long	Appropriate	5	3	3	No		5	5	3	5	No	5	5	5	5	4	3	No		The time in between the actual exam and time you wait was too long. Some of us waited for up to 4 hours before we can go home and that with having to come back the next day.	Excellent, appreciate the work that went into putting all this together.	The time in between the actual exam and time you wait was too long. Some of us waited for up to 4 hours before we can go home and that with having to come back the next day.	None
2020-10-29 16:45:53	Yes	FC Paed(SA) Part II	Cape Town	5	5	Too long	Appropriate	5	4	4	No		5	5	2	5	No	5	5	5	5	5	5	No		the examination could be done in 1 day over zoom.	i did not have to travel to an unknown city during a very stressful time	the fact that it was over 3 days instead of 1	no
2020-10-29 17:12:18	Yes	FC Paed(SA) Part II	Durban	4	4	Much too long	Appropriate	3	3	2	Yes	The playback for the video in developmental station was not very clear at times	3	4	2	5	No	5	3	5	5	4	3	Yes	The examiner disconnected twice, but on reconnecting to the zoom platform I was given sufficient time to complete the station	The time interval between cases and waiting time after arrival for the exam	The examiners were all very encouraging and patient	Difficulty with showing empathy during the counselling stations over the zoom platform as well as being unsure whether to focus on looking at the examiner or the camera	Being the first of such exams, I would like to commend the CMSA on running the exam very well overall
2020-10-29 17:14:50	Yes	FC Paed(SA) Part II	Durban	3	3	Much too long	Much too long	3	3	4	Yes	Developmental station - video buffering, unable to completely assess	3	4	3	4	No	4	1	3	3	3	3	No		Shorter waiting times, stronger wifi	Yes	Waiting times of the examination	Thank you to all that participated in preparation for this exam. The emotional toll of the year 2020 was very extensive, and with the exams being so long and drawn out had a significant bearing on the emotions as well as exam preparation. All in all we hope for the best.
2020-10-29 17:32:47	Yes	FC Paed(SA) Part II	Durban	5	5	Much too long	Appropriate	3	3	3	Yes	The developement video was buffering and not clear	4	4	3	4	No	4	1	4	1	3	1	No		Enhance network connectivity at the examiners site	Exposure to virtual exams	Time waiting each day	No
2020-10-29 17:35:40	Yes	FC Paed(SA) Part II	Cape Town	5	5	Too long	Appropriate	5	4	4	No		5	5	2	4	No	5	3	5	5	3	3	No		developmental video very broken up and fragmented, too quick	examiners were lovely and engaging and supportive	the long waiting period from arrival to time of exam	improving developmental video via zoom
2020-10-29 17:35:52	Yes	FC Paed(SA) Part II	Cape Town	5	5	Appropriate	Appropriate	5	4	4	Yes	just a small glitch with sound during developmental video, but quickly overcome. all other stations were smooth.	5	4	2	5	No	5	5	4	4	4	3	Yes	explained previously. mostly smooth. small glitch with sound during developmental video.	it would really help if its not so dragged out.	well organised, well run. friendly invigilators.	that everything was so dragged out, over many days, and hours.	firstly I would like to say a huge thank you! I realise this has taken tremendous planning and late nights to organise. Really thankful we were able to do this exam still in this year. Many many thanks!!
2020-10-29 17:45:55	Yes	FC Paed(SA) Part II	Durban	4	4	Much too long	Appropriate	3	3	3	Yes	Only with the video station	3	4	2	4	No	3	2	5	5	4	4	Yes	only with the video but not major problems	Not to have the invigilator knocking at the door to notify about time left but rather have a bell or the examiner to monitor the time	relaxed environment and highly efficient process	finding parking at the venue or to access the venue was challenging	to be allowed to read from our hard copies/notes whilst we wait for exams as waiting times were about 3hrs before the first session.
2020-10-29 17:54:50	Yes	FC Paed(SA) Part II	Johannesburg	4	3	Appropriate	Appropriate	2	3	4	Yes	The development video quality was poor I couldn't see gait well. Couldn't see the square and triangle well the language interpreter on background was destructive	3	3	4	4	No	3	3	3	2	2	2	No		Video quality avoid other people who are not examiners on the screen not to appear its alittle disturbing	Not much I feel it took to long to get to do zoom exam an I felt 3 days was exhausting emotionally and physically	The quality of videos	Not at the moment
2020-10-29 17:56:27	Yes	FC Paed(SA) Part II	Johannesburg	3	3	Too long	Appropriate	4	3	3	No		3	4	2	2	No	4	5	3	3	5	5	No		Decrease waiting times and provide tables for all candidates while waiting.	None	The long wait.	No
2020-10-29 18:00:48	Yes	FC Paed(SA) Part II	Johannesburg	5	5	Much too long	Too short	4	4	5	Yes	Poor signal at times. Poor sound qaulity at times	5	3	5	4	No	3	4	4	4	3	3	Yes	Examiner signal lost and call had to be restarted. Signal interruption and poor sound qaulity	Using earphones might assist with sound qaulity, have a buzzer or bell in the exam room to enable you to ask for assistance if signal is lost. Or having a technical person in the room while you are busy	Friendly and kind CMSA staff.	The long duration of the exam. Not being able to see a physical patuent or video of the pasient from the start. Havimg to constantly ask for more information where you would have been able to see it at a glance if you saw a real patient	No
2020-10-29 18:07:25	Yes	FC Paed(SA) Part II	Johannesburg	5	5	Too short	Too short	5	5	5	No		5	5	3	5	No	5	5	5	5	5	5	No		The quality of the format used, in my opinion, was excellent at our examination center. So, objectively, there is not much to be improved.	Not having to travel long distance.	The time spent waiting in the foyer, 4 hours, before one could be called in.	Perhaps organizing it closer to the long cases exams.
2020-10-29 18:40:31	Yes	FC Paed(SA) Part II	Johannesburg	4	5	Much too long	Appropriate	4	3	3	Yes	The development station had a video, the video was not very clear. It was recorded in africans and since the language of instruction is english i thought this to be inappropriate. I strugfled to concentrate on the interpretter as well as watch whats happening in the video	4	5	2	4	No	5	3	5	1	3	3	Yes	The video quality was poor for the development station	Clearer images and videos	Not having to travel far for the exam	Waiting times to be examined were extensive. Being examined everyday for 3days was exhausting If it can all be done in 1 day tgat would be better	No
2020-10-29 18:44:45	Yes	FC Paed(SA) Part II	Johannesburg	5	4	Appropriate	Appropriate	5	5	2	No		5	5	2	5	No	5	4	5	5	5	3	No		The exam process was smooth for me	The spread of the cases over 3 days made the process less stressful	nil	nil
2020-10-29 19:48:37	Yes	FC Paed(SA) Part II	Johannesburg	4	3	Too long	Appropriate	4	3	3	Yes	Blurry video	4	4	2	4	No	4	3	1	1	3	4	Yes	Video not clear.but examiner re-played the part	Have all six stations in one day	Fair cases	On day 1 there was no warning regarding time left	Reduce the number of hours one waits to be called in for a case
2020-10-29 21:47:51	Yes	FC Paed(SA) Part II	Johannesburg	3	3	Much too long	Too short	3	4	5	No		3	3	5	5	No	5	3	3	3	2	2	No		Give pictures for shirt questions Be patient	Distance	Doing exam at night was tiring , mind blocking. I would have preferred 2 centres and exams finished by 5pm	Adequate time should be given toimagine scenario especially in short questions or rather put a video of the scenario
2020-10-29 23:37:39	Yes	FC Paed(SA) Part II	Johannesburg	2	5	Much too long	Much too short	3	3	4	Yes	The viewing of 2 screens was confusing especially when a role player scenario was invloved-to make eye contact one had to look at a blank homepage screen and could not gauge non verbal ques from the role player	3	2	4	3	No	5	4	2	1	2	2	No		All stations should be done on one day and lengthy waiting times should be reduced as it is not conducive to enhancing the candidates optimal performance. This is particularly disadvantageous to candidates who have their exams at the end of the day when fatigue and anticipation compromises clinical judgement. The logistics also need to be refined- the timing of the stations were not fair and some…	Nothing	The long waiting period of 5 hours each day. No desks to read while waiting. The prolonged period over which the examination took place. The delay with the results. The lack of communication regarding the format - we were told 5 days before the exam what the format of the short case would be-this is unfair in terms of allowing us adequate preparation time.	While zoom is convenient for the examiners and cost saving to the candidates the logistics compromises candidates performance
2020-10-30 02:20:59	Yes	FC Paed(SA) Part II	Johannesburg	3	4	Appropriate	Appropriate	2	3	5	Yes	The two minute warning before end of my station was never heard/ clear coming from the examiners	3	2	5	3	No	3	4	4	3	2	2	Yes	Communication station, The screen showing the face is on a computer diff from the camera you are supposed to address/ look. So you focus keeps changing	The old system is the best	Didn't need to travel far.No expenses.	Having to come at 11am and getting in your first examination station at 3pm and last one by 5pm.	Time waiting for your the starting of exams for the afternoon candidates was too long.
2020-10-30 05:48:32	Yes	FC Paed(SA) Part II	Johannesburg	4	4	Appropriate	Appropriate	4	3	3	Yes	Blurry video at certain points	4	4	3	4	No	4	4	4	4	4	4	Yes	Lost audio	Test run all stations every morning before the start of the exam	Besides the glitches... The exam still ran quiet smoothly	Inadequate history given on a case that it a real patient was present, it would be an obvious diagnosis	No
2020-10-30 17:45:30	Yes	FC Paed(SA) Part II	Johannesburg	3	4	Much too long	Appropriate	2	3	3	Yes	Did not know which questions to ask in the short cases. How many pictures I was supposed to have been shown.	3	4	2	4	No	4	2	5	3	3	4	No		Be clear with how the short cases should run, candidates need to know what to expect/ what to ask the examiners. Examiners need to be clear and forth coming with giving information to candidates.	Saved money, travelled from home. Being in familiar surroundings.	Waiting period too long. Was very tired by the time are started the exam	Show the pictures to the candidates, or show a realistic video.
2020-10-30 22:17:27	Yes	FC Paed(SA) Part II	Johannesburg	4	3	Too long	Appropriate	4	3	4	Yes	Developmental video had glitches	4	3	4	5	No	4	4	3	3	3	2	No		Whatever is in place is ok	The exam was fun	Waiting 4 hrs after exam to go home	No
2020-11-02 06:36:15	Yes	FC Paed(SA) Part II	Johannesburg	1	2	Much too short	Much too short	1	3	5	Yes	See next comment section	1	2	5	4	No	4	1	1	2	1	1	Yes	This exam should never be conducted via zoom. Even though the CMSA bandwidth is good, the examiners bandwidth may not be that fast. A lot of candidates struggled with the developmental video which kept on skipping sections of the video. Several people had technical issues with their other stations too.	Do live stations...Zoom does not work well and just adds unnecessary stress to the candidate	None at all	We were locked up (initially planned until 7pm i.e. almost 13 hrs for some ppl), you took our phones/electronic devices away, made us sit on the most uncomfortable chairs in a large hall and told us to keep quiet for upto 4 or 5 hrs. Thats really inhumane! I think this whole format was planned based on examiner convenience and not candidate convenience. To have people fly twice (long cases then s…	Dont do it. Stick to doing all cases (long and short) live and not on zoom on 1 day please. Its been a difficult year and to think that one could fail after all this torture is really heartbreaking. I hope u will be lenient with the marking.
2020-11-03 16:00:50	Yes	FC Ophth(SA) Final	Cape Town	4	5	Appropriate	Too short	4	5	1	No		5	5	1	5	Yes	5	5	5	5	5	5	No		No improvement needed	Everything	Nothing	No
2020-11-03 16:43:48	Yes	FC Paed(SA) Part II	Johannesburg	5	3	Much too long	Appropriate	5	3	5	Yes	At some point i could not hear the role player well.	4	5	5	5	No	5	5	5	5	5	5	No		The timing was a problem. The waiting time for exam was so long.	covid 19 safety measures were outstanding	Waiting time was too long	Shortning of the exam time will be great
2020-11-03 16:47:01	Yes	FC Path(SA) Anat Part II	Johannesburg	3	2	Much too long	Too short	2	3	4	No		2	3	4	5	Yes	4	2	3	3	2	4	No		Clearer pictures	Short answers were required	Many Cytology cases	Less cytology cases. Clear pictures.
2020-11-03 17:15:26	Yes	FC Path(SA) Anat Part II	Johannesburg	3	2	Much too long	Too short	2	3	3	Yes	Unclear images	2	3	3	3	No	3	3	3	3	3	3	No		.	.	Unfair exam, time allocation for cases, level of questions inappropriate.	No
2020-11-03 17:16:22	Yes	Cert Pulmonology(SA) Phys	Johannesburg	5	5	Too long	Appropriate	5	4	2	No		5	5	1	4	Yes	5	5	5	5	5	5	No		It was fair	I didn’t have to travel	The exam was long	No
2020-11-03 17:56:20	Yes	FC Paed(SA) Part II	Johannesburg	3	3	Too short	Too short	3	5	5	Yes	The examinar puctur was in computer, and my camer was on other computer , make eye to eye contact defficult	3	5	5	5	No	5	4	5	5	5	5	Yes		An IT should attend in the room	New rxperience	NAD	NO
2020-11-03 18:07:02	Yes	FC Paed(SA) Part II	Polokwane	5	5	Too long	Appropriate	4	5	1	No		5	5	3	5	Yes	5	5	5	4	5	5	No		Run a full mock exam for candidates per province before the real exam dates	It was fair and has not much clinical difference with physical exams	Nil	To at least bring refreshments for candidates
2020-11-03 18:19:28	Yes	Cert Pulmonology(SA) Phys	Johannesburg	5	5	Too long	Appropriate	5	4	2	No		5	5	1	4	Yes	5	5	5	5	5	5	No		It was fair	I didn’t have to travel	The exam was long	No
2020-11-03 18:47:45	Yes	FC Ophth(SA) Final	Bloemfontein	5	5	Appropriate	Appropriate	5	3	5	No		5	5	1	5	No	5	5	5	5	5	5	No		Nil	Nil	Nil	Nil
2020-11-03 18:50:52	Yes	Cert Trauma Surgery(SA)	Johannesburg	5	5	Appropriate	Too short	4	3	1	No		5	5	3	5	No	5	5	5	5	4	3	No		More time	Not intimidated by examiners presence	Time was short for the examiner to read the main questions and still asks the questions	More time
2020-11-03 20:15:06	Yes	FC Paed(SA) Part II	Johannesburg	2	2	Much too long	Too short	2	2	4	Yes		3	2	3	2	No	2	3	1	1	2	1	Yes		All stations on one day	Nil	18 hours of solitary confinement	No
2020-11-03 20:15:09	Yes	FC Paed(SA) Part II	Johannesburg	2	2	Much too long	Too short	2	2	4	Yes		3	2	3	2	No	2	3	1	1	2	1	Yes		All stations on one day	Nil	18 hours of solitary confinement	No
2020-11-04 06:10:08	Yes	FC Paed(SA) Part II	Johannesburg	3	4	Much too long	Too short	3	3	3	Yes	The development video was unclear and the translation to English was delayed.	3	3	3	2	No	3	2	3	2	3	3	Yes	The video would not play, IT sorted it out. There was a delay in the translation in the video.	Maybe have the case presented with a visual image of the the child from the start to simulate an actual patient. This would create a more real scenario as you would be able to visualize the patient.	The cases ran smoothly except for the technical glitch.	It was a very long drawn out exam.	No
2020-11-04 06:48:30	Yes	FC Paed(SA) Part II	Johannesburg	5	5	Appropriate	Appropriate	5	5	5	No		5	5	1	5	No	5	4	5	5	5	4	No		Please Cut out the history part of the short case, it made tine available for the short case unmanageable.	Less anxiety with the zoom examinations, and the cases were fair	Doing the exam over 3 days, perhaps 2 daya would work better	No
2020-11-04 06:52:28	Yes	FC Paed(SA) Part II	Cape Town	4	4	Appropriate	Appropriate	4	3	3	No		3	4	1	4	No	5	4	4	4	3	2	No		the time we spent in the holding rooms is too long	it was well organized	the waiting time	it was well organized,keep it up
2020-11-04 10:59:54	Yes	FC Paed(SA) Part II	Johannesburg	2	3	Appropriate	Appropriate	3	1	5	Yes	No sound for video and video flickering during developmental station	3	1	3	1	No	5	1	1	1	1	1	Yes	Go check video ws recorded urself	Go back to original way of exams	My examiners where nice with exception of one person with big hair and head phones	Whole experience	Zoom oral exams a no no for me
2020-11-04 13:21:44	Yes	FC Paed(SA) Part II	Bloemfontein	5	5	Appropriate	Appropriate	3	5	3	Yes	Video freezing	5	5	1	5	No	5	4	1	1	5	1	Yes	Video freezing	Ensure videos don’t freeze prior to choosing them	It was ran very smoothly	The number of days , one day would be better .	Excellent exam
2020-11-04 13:22:05	Yes	FC Paed(SA) Part II	Bloemfontein	5	5	Appropriate	Appropriate	3	5	3	Yes	Video freezing	5	5	1	5	No	5	4	1	1	5	1	Yes	Video freezing	Ensure videos don’t freeze prior to choosing them	It was ran very smoothly	The number of days , one day would be better .	Excellent exam
2020-11-04 13:58:09	Yes	FC Path(SA) Anat Part II	Johannesburg	4	4	Appropriate	Too short	4	4	1	No		4	4	1	4	Yes	4	4	4	4	4	4	No		It was perfect	The exam was fair	None	None
2020-11-04 14:17:55	Yes	FC Path(SA) Anat Part II	Johannesburg	3	2	Much too long	Too short	2	3	3	Yes	Unclear images	2	3	3	3	No	3	3	3	3	3	3	No		.	.	Unfair exam, time allocation for cases, level of questions inappropriate.	No
2020-11-04 18:53:04	Yes	FC Paed(SA) Part II	Johannesburg	4	4	Too long	Appropriate	4	4	5	No		3	3	4	3	No	4	4	2	2	3	1	No		None applicable	Equality in types of cases across many candidates	The extended periods of waiting before cases and having the spread over 3 days. I think virtual cases allow for more cases therefore candidates could have their exam in one day	It can form part of clinical exams but live patients still form a critical role
2020-11-05 08:41:37	Yes	FC Psych(SA) Part II	East London	5	5	Appropriate	Appropriate	5	5	2	Yes	To read and prepare for all 3 interactive Zoom stations at the beginning and thewn come in and remember what I have prepared for each station.	4	4	2	5	No	5	5	5	5	5	5	Yes	Instruction that I could scroll the scenarios myself was not clarified at the beginning. One time I was trying to respond to scenarion 2 while the screen showed scenario 3. This should be clearly stated to future candidates.	Nil to add at this stage	Nil to add	Nil to add	Nil to add
2020-11-05 17:16:34	Yes	FC Ophth(SA) Final	Bloemfontein	5	5	Appropriate	Appropriate	5	3	5	No		5	5	1	5	No	5	5	5	5	5	5	No		Nil	Nil	Nil	Nil
2020-11-05 21:19:14	Yes	FC Paed(SA) Part II	Johannesburg	3	4	Much too short	Much too short	1	3	4	No		3	3	4	4	Yes	5	5	5	5	3	3	No		None	Time saving and no travelling expenses	Spent a long time waiting to do the exam	Increase time
2020-11-12 10:53:07	Yes	Cert Vascular Surgery(SA)	Durban	5	5	Appropriate	Appropriate	4	2	3	No		5	5	1	5	No	5	4	5	5	5	5	No		it was fair	saved money	not having the time to scroll through images myself	no
2020-11-17 18:30:37	Yes	FC Psych(SA) Part II	Johannesburg	3	3	Too long	Too long	3	3	3	No		3	3	3	3	No	3	3	3	3	3	3	No		shorten the duration of exams	less anxiety provoking	long case scenarios	no
